# Supplementary material
Source: publisher figshare collection journal article supplement (https://acs.figshare.com/ndownloader/files/3855826)
Supplement: Supplementary file 1 [file 3855826]

 
data_10mz505_0m
 
_audit_creation_method            SHELXL-2013
_chemical_name_systematic
;
 ?
;
_chemical_name_common             ?
_chemical_melting_point           ?
_chemical_formula_moiety          ?
_chemical_formula_sum
 'C44 H26 N6 O' 
_chemical_formula_weight          654.71

loop_
 _atom_type_symbol
 _atom_type_description
 _atom_type_scat_dispersion_real
 _atom_type_scat_dispersion_imag
 _atom_type_scat_source
 'C'  'C'   0.0033   0.0016
 'International Tables Vol C Tables 4.2.6.8 and 6.1.1.4'
 'H'  'H'   0.0000   0.0000
 'International Tables Vol C Tables 4.2.6.8 and 6.1.1.4'
 'N'  'N'   0.0061   0.0033
 'International Tables Vol C Tables 4.2.6.8 and 6.1.1.4'
 'O'  'O'   0.0106   0.0060
 'International Tables Vol C Tables 4.2.6.8 and 6.1.1.4'
 
_space_group_crystal_system       monoclinic
_space_group_IT_number            14
_space_group_name_H-M_alt         'P 21/c'
_space_group_name_Hall            '-P 2ybc'
 
_shelx_space_group_comment
;
The symmetry employed for this shelxl refinement is uniquely defined
by the following loop, which should always be used as a source of
symmetry information in preference to the above space-group names.
They are only intended as comments.
;
 
loop_
 _space_group_symop_operation_xyz
 'x, y, z'
 '-x, y+1/2, -z+1/2'
 '-x, -y, -z'
 'x, -y-1/2, z-1/2'
 
_cell_length_a                    25.595(6)
_cell_length_b                    9.572(2)
_cell_length_c                    25.369(6)
_cell_angle_alpha                 90
_cell_angle_beta                  97.710(4)
_cell_angle_gamma                 90
_cell_volume                      6159(2)
_cell_formula_units_Z             8
_cell_measurement_temperature     100(2)
_cell_measurement_reflns_used     2479 
_cell_measurement_theta_min       2.2800
_cell_measurement_theta_max       20.9877 
 
_exptl_crystal_description        plate 
_exptl_crystal_colour             black
_exptl_crystal_density_meas       ? 
_exptl_crystal_density_method     ?              
_exptl_crystal_density_diffrn     1.412          
_exptl_crystal_F_000              2720
_exptl_transmission_factor_min    ?                                             
_exptl_transmission_factor_max    ?                                             
_exptl_crystal_size_max           0.25 
_exptl_crystal_size_mid           0.21
_exptl_crystal_size_min           0.09
_exptl_absorpt_coefficient_mu     0.087
_shelx_estimated_absorpt_T_min    ? 
_shelx_estimated_absorpt_T_max    ? 
_exptl_absorpt_correction_type    'multi-scan'
_exptl_absorpt_correction_T_min   0.6554 
_exptl_absorpt_correction_T_max   0.7461
_exptl_absorpt_process_details    'Apex2  v2009.7-0 (Bruker, 2009)'
 
_exptl_special_details
;
Two crystallographically independent molecules are both flip disordered 
with the main difference being the position of the oxygen atom, being 
bonded to one or the other pyridyl N atom. In one of the two molecule 
sites the disorder also affects about half of the remainder of the 
molecule, and restraints and constraints were used in the refinement.
The occupancy ratios are 0.266(5) to 0.734(5) for the two disordered 
oxygen atoms O1A and O1B, and 0.522(3) to 0.478(3) for the two 
disordered fragments. Equivalent bond distances in the two fragments 
were restraint to be similar, and overlapping atoms were constrained to 
have identical ADPs. The atoms C4C, C18C, C20C, N4C and C16C were also 
restrained to be approximately isotropic. 

Reflection 1 0 0 was affected by the beam stop and was omitted from the 
refinement. 
;
 
_diffrn_ambient_temperature       100(2)
_diffrn_radiation_wavelength      0.71073
_diffrn_radiation_type            MoK\a
_diffrn_source                    'fine-focus sealed tube' 
_diffrn_radiation_monochromator   graphite 
_diffrn_measurement_device_type   'Bruker AXS SMART APEX CCD diffractometer'  
_diffrn_measurement_method        '\w scans' 
_diffrn_detector_area_resol_mean  ? 
_diffrn_reflns_number             36349
_diffrn_reflns_av_unetI/netI      0.1229
_diffrn_reflns_av_R_equivalents   0.0729
_diffrn_reflns_limit_h_min        -34
_diffrn_reflns_limit_h_max        27
_diffrn_reflns_limit_k_min        -12
_diffrn_reflns_limit_k_max        11
_diffrn_reflns_limit_l_min        -33
_diffrn_reflns_limit_l_max        28
_diffrn_reflns_theta_min          1.902
_diffrn_reflns_theta_max          28.282
_diffrn_reflns_theta_full         25.242
_diffrn_measured_fraction_theta_max   0.981
_diffrn_measured_fraction_theta_full  0.995
_diffrn_reflns_Laue_measured_fraction_max    0.981
_diffrn_reflns_Laue_measured_fraction_full   0.995
_diffrn_reflns_point_group_measured_fraction_max   0.981
_diffrn_reflns_point_group_measured_fraction_full  0.995
_reflns_number_total              15005
_reflns_number_gt                 7660
_reflns_threshold_expression      'I > 2\s(I)'
_reflns_Friedel_coverage          0.000
_reflns_Friedel_fraction_max      .
_reflns_Friedel_fraction_full     .
 
_reflns_special_details
;
 Reflections were merged by SHELXL according to the crystal
 class for the calculation of statistics and refinement.
 
 _reflns_Friedel_fraction is defined as the number of unique
 Friedel pairs measured divided by the number that would be
 possible theoretically, ignoring centric projections and
 systematic absences.
;
 
_computing_data_collection        'Apex2  v2009.7-0 (Bruker, 2009)' 
_computing_cell_refinement        'SAINT V7.66A (Bruker, 2010)' 
_computing_data_reduction         'SAINT V7.66A (Bruker, 2010)'
_computing_structure_solution     'SHELXS-97 (Sheldrick, 2008)' 
_computing_structure_refinement   
;  
SHELXL-2013 (Sheldrick, 2013), 
SHELXLE Rev645 (H\"ubschle et al., 2011)
; 
_computing_molecular_graphics     ? 
_computing_publication_material   ?
 
_refine_special_details
;
 ?
;
_refine_ls_structure_factor_coef  Fsqd
_refine_ls_matrix_type            full
_refine_ls_weighting_scheme       calc
_refine_ls_weighting_details
'w=1/[\s^2^(Fo^2^)+(0.0462P)^2^+2.4062P] where P=(Fo^2^+2Fc^2^)/3'
_atom_sites_solution_primary      direct 
_atom_sites_solution_secondary    difmap
_atom_sites_solution_hydrogens    geom
_refine_ls_hydrogen_treatment     constr
_refine_ls_extinction_method      none
_refine_ls_extinction_coef        .
_refine_ls_number_reflns          15005
_refine_ls_number_parameters      1017
_refine_ls_number_restraints      91
_refine_ls_R_factor_all           0.1525
_refine_ls_R_factor_gt            0.0688
_refine_ls_wR_factor_ref          0.1560
_refine_ls_wR_factor_gt           0.1327
_refine_ls_goodness_of_fit_ref    1.017
_refine_ls_restrained_S_all       1.015
_refine_ls_shift/su_max           0.000
_refine_ls_shift/su_mean          0.000
 
loop_
 _atom_site_label
 _atom_site_type_symbol
 _atom_site_fract_x
 _atom_site_fract_y
 _atom_site_fract_z
 _atom_site_U_iso_or_equiv
 _atom_site_adp_type
 _atom_site_occupancy
 _atom_site_site_symmetry_order  
 _atom_site_calc_flag
 _atom_site_refinement_flags_posn
 _atom_site_refinement_flags_adp
 _atom_site_refinement_flags_occupancy
 _atom_site_disorder_assembly
 _atom_site_disorder_group
C1A C 0.10326(11) 0.2323(3) 0.49284(11) 0.0328(7) Uani 1 1 d . . . . .
C2A C 0.04823(11) 0.2202(3) 0.49673(11) 0.0383(8) Uani 1 1 d . . . . .
H2A H 0.0294 0.2705 0.5204 0.046 Uiso 1 1 calc R U . . .
C3A C 0.02780(11) 0.1235(3) 0.46026(10) 0.0351(7) Uani 1 1 d . . . . .
H3A H -0.0080 0.0946 0.4540 0.042 Uiso 1 1 calc R U . . .
C4A C 0.06916(10) 0.0729(3) 0.43310(10) 0.0315(7) Uani 1 1 d . . . . .
C5A C 0.06457(10) -0.0287(3) 0.39380(10) 0.0328(7) Uani 1 1 d . . . . .
C6A C 0.10737(11) -0.0904(3) 0.37162(11) 0.0353(7) Uani 1 1 d . . . . .
C7A C 0.10141(11) -0.1836(4) 0.32687(11) 0.0450(9) Uani 1 1 d . . . . .
H7A H 0.0691 -0.2159 0.3080 0.054 Uiso 1 1 calc R U . . .
C8A C 0.15022(11) -0.2168(3) 0.31675(11) 0.0427(8) Uani 1 1 d . . . . .
H8A H 0.1590 -0.2762 0.2892 0.051 Uiso 1 1 calc R U . . .
C9A C 0.18646(10) -0.1450(3) 0.35566(10) 0.0318(7) Uani 1 1 d . . . . .
C10A C 0.24162(10) -0.1589(3) 0.36028(10) 0.0287(6) Uani 1 1 d . . . . .
C11A C 0.27744(10) -0.1100(3) 0.40274(10) 0.0269(6) Uani 1 1 d . . . . .
C12A C 0.33332(10) -0.1241(3) 0.41041(11) 0.0299(6) Uani 1 1 d . . . . .
H12A H 0.3540 -0.1639 0.3859 0.036 Uiso 1 1 calc R U . . .
C13A C 0.35194(10) -0.0707(3) 0.45897(11) 0.0299(6) Uani 1 1 d . . . . .
H13A H 0.3878 -0.0678 0.4746 0.036 Uiso 1 1 calc R U . . .
C14A C 0.30801(10) -0.0199(3) 0.48211(10) 0.0270(6) Uani 1 1 d . . . . .
C15A C 0.30774(10) 0.0517(3) 0.53165(10) 0.0258(6) Uani 1 1 d . . . . .
C16A C 0.26791(10) 0.1438(3) 0.54118(10) 0.0258(6) Uani 1 1 d . . . . .
C17A C 0.27404(10) 0.2275(3) 0.58904(10) 0.0260(6) Uani 1 1 d . . . . .
C18A C 0.22682(10) 0.3100(3) 0.58538(10) 0.0267(6) Uani 1 1 d . . . . .
C19A C 0.19456(10) 0.2653(3) 0.53729(10) 0.0266(6) Uani 1 1 d . . . . .
C20A C 0.14194(10) 0.3084(3) 0.52720(10) 0.0305(7) Uani 1 1 d . . . . .
C21A C 0.01012(10) -0.0769(3) 0.37324(10) 0.0338(7) Uani 1 1 d . . . . .
C22A C -0.02796(10) 0.0197(3) 0.35229(10) 0.0372(7) Uani 1 1 d . . . . .
H22A H -0.0192 0.1160 0.3516 0.045 Uiso 1 1 calc R U . . .
C23A C -0.07877(11) -0.0240(4) 0.33241(12) 0.0451(9) Uani 1 1 d . . . . .
H23A H -0.1044 0.0421 0.3178 0.054 Uiso 1 1 calc R U . . .
C24A C -0.09163(12) -0.1634(4) 0.33412(12) 0.0482(9) Uani 1 1 d . . . . .
H24A H -0.1264 -0.1934 0.3211 0.058 Uiso 1 1 calc R U . . .
C25A C -0.05433(11) -0.2592(4) 0.35463(11) 0.0424(8) Uani 1 1 d . . . . .
H25A H -0.0634 -0.3554 0.3555 0.051 Uiso 1 1 calc R U . . .
C26A C -0.00347(11) -0.2169(3) 0.37409(11) 0.0384(7) Uani 1 1 d . . . . .
H26A H 0.0220 -0.2841 0.3880 0.046 Uiso 1 1 calc R U . . .
C27A C 0.26337(10) -0.2362(3) 0.31694(11) 0.0297(6) Uani 1 1 d . . . . .
C28A C 0.25518(11) -0.1826(3) 0.26512(11) 0.0344(7) Uani 1 1 d . . . . .
H28A H 0.2363 -0.0976 0.2582 0.041 Uiso 1 1 calc R U . . .
C29A C 0.27422(12) -0.2520(3) 0.22405(12) 0.0413(8) Uani 1 1 d . . . . .
H29A H 0.2689 -0.2143 0.1891 0.050 Uiso 1 1 calc R U . . .
C30A C 0.30087(12) -0.3761(4) 0.23377(14) 0.0508(9) Uani 1 1 d . . . . .
H30A H 0.3136 -0.4243 0.2053 0.061 Uiso 1 1 calc R U . . .
C31A C 0.30927(12) -0.4312(3) 0.28466(14) 0.0475(9) Uani 1 1 d . . . . .
H31A H 0.3278 -0.5168 0.2912 0.057 Uiso 1 1 calc R U . . .
C32A C 0.29043(11) -0.3609(3) 0.32618(12) 0.0373(7) Uani 1 1 d . . . . .
H32A H 0.2962 -0.3986 0.3611 0.045 Uiso 1 1 calc R U . . .
C33A C 0.34779(10) 0.0277(3) 0.57705(10) 0.0274(6) Uani 1 1 d . . . . .
C34A C 0.38238(10) -0.0888(3) 0.58065(11) 0.0335(7) Uani 1 1 d . . . . .
H34A H 0.3809 -0.1519 0.5516 0.040 Uiso 1 1 calc R U . . .
C35A C 0.41813(11) -0.1123(3) 0.62557(12) 0.0385(8) Uani 1 1 d . . . . .
H35A H 0.4404 -0.1922 0.6274 0.046 Uiso 1 1 calc R U . . .
C36A C 0.42177(11) -0.0190(3) 0.66847(12) 0.0399(8) Uani 1 1 d . . . . .
H36A H 0.4478 -0.0327 0.6984 0.048 Uiso 1 1 calc R U . . .
C37A C 0.38807(11) 0.0914(3) 0.66722(11) 0.0363(7) Uani 1 1 d . . . . .
H37A H 0.3903 0.1536 0.6966 0.044 Uiso 1 1 calc R U . . .
C38A C 0.34997(11) 0.1140(3) 0.62274(10) 0.0307(7) Uani 1 1 d . . . . .
C39A C 0.12693(11) 0.4199(3) 0.56076(11) 0.0340(7) Uani 1 1 d . . . . .
C40A C 0.16095(11) 0.4619(3) 0.60661(11) 0.0322(7) Uani 1 1 d . . . . .
C41A C 0.14626(12) 0.5641(3) 0.64150(12) 0.0388(7) Uani 1 1 d . . . . .
H41A H 0.1696 0.5888 0.6724 0.047 Uiso 1 1 calc R U . . .
C42A C 0.09840(13) 0.6278(3) 0.63075(13) 0.0465(8) Uani 1 1 d . . . . .
H42A H 0.0876 0.6941 0.6550 0.056 Uiso 1 1 calc R U . . .
C43A C 0.06542(13) 0.5958(4) 0.58439(13) 0.0492(9) Uani 1 1 d . . . . .
H43A H 0.0327 0.6431 0.5763 0.059 Uiso 1 1 calc R U . . .
C44A C 0.07959(12) 0.4962(3) 0.55000(12) 0.0423(8) Uani 1 1 d . . . . .
H44A H 0.0568 0.4782 0.5180 0.051 Uiso 1 1 calc R U . . .
C5C C 0.36759(10) 0.1757(3) 0.33996(10) 0.0284(6) Uani 1 1 d D . . . .
C6C C 0.39483(10) 0.2031(3) 0.39097(10) 0.0237(6) Uani 1 1 d . . . . .
C7C C 0.44789(10) 0.1585(3) 0.40884(10) 0.0258(6) Uani 1 1 d . . . . .
H7C H 0.4702 0.1076 0.3887 0.031 Uiso 1 1 calc R U . . .
C8C C 0.45988(10) 0.2023(3) 0.45932(10) 0.0241(6) Uani 1 1 d . . . . .
H8C H 0.4921 0.1875 0.4819 0.029 Uiso 1 1 calc R U . . .
C9C C 0.41410(9) 0.2764(3) 0.47246(10) 0.0239(6) Uani 1 1 d . . . . .
C10C C 0.41257(10) 0.3486(3) 0.52067(10) 0.0235(6) Uani 1 1 d . . . . .
C11C C 0.37141(10) 0.4303(3) 0.53421(10) 0.0262(6) Uani 1 1 d . . . . .
C12C C 0.36785(10) 0.4892(3) 0.58498(11) 0.0288(6) Uani 1 1 d . . . . .
H12C H 0.3934 0.4800 0.6156 0.035 Uiso 1 1 calc R U . . .
C13C C 0.32165(11) 0.5611(3) 0.58252(11) 0.0321(7) Uani 1 1 d . . . . .
H13C H 0.3094 0.6096 0.6111 0.038 Uiso 1 1 calc R U . . .
C14C C 0.29499(11) 0.5508(3) 0.52972(11) 0.0334(7) Uani 1 1 d D . . . .
C21C C 0.39796(11) 0.1164(3) 0.29881(10) 0.0300(6) Uani 1 1 d . . . . .
C22C C 0.38437(11) -0.0120(3) 0.27513(10) 0.0350(7) Uani 1 1 d . . . . .
H22C H 0.3561 -0.0641 0.2860 0.042 Uiso 1 1 calc R U . . .
C23C C 0.41170(12) -0.0645(4) 0.23593(11) 0.0428(8) Uani 1 1 d . . . . .
H23C H 0.4023 -0.1526 0.2202 0.051 Uiso 1 1 calc R U . . .
C24C C 0.45272(12) 0.0114(4) 0.21962(11) 0.0463(9) Uani 1 1 d . . . . .
H24C H 0.4714 -0.0245 0.1927 0.056 Uiso 1 1 calc R U . . .
C25C C 0.46650(11) 0.1403(4) 0.24273(11) 0.0409(8) Uani 1 1 d . . . . .
H25C H 0.4942 0.1933 0.2312 0.049 Uiso 1 1 calc R U . . .
C26C C 0.43985(11) 0.1912(3) 0.28245(10) 0.0348(7) Uani 1 1 d . . . . .
H26C H 0.4501 0.2780 0.2989 0.042 Uiso 1 1 calc R U . . .
C27C C 0.46107(9) 0.3431(3) 0.56113(9) 0.0228(6) Uani 1 1 d . . . . .
C28C C 0.47717(10) 0.2190(3) 0.58768(10) 0.0264(6) Uani 1 1 d . . . . .
H28C H 0.4572 0.1360 0.5803 0.032 Uiso 1 1 calc R U . . .
C29C C 0.52218(10) 0.2170(3) 0.62462(10) 0.0297(6) Uani 1 1 d . . . . .
H29C H 0.5323 0.1332 0.6433 0.036 Uiso 1 1 calc R U . . .
C30C C 0.55257(10) 0.3359(3) 0.63459(10) 0.0290(6) Uani 1 1 d . . . . .
H30C H 0.5836 0.3333 0.6597 0.035 Uiso 1 1 calc R U . . .
C31C C 0.53767(10) 0.4582(3) 0.60801(10) 0.0317(7) Uani 1 1 d . . . . .
H31C H 0.5587 0.5398 0.6145 0.038 Uiso 1 1 calc R U . . .
C32C C 0.49149(10) 0.4617(3) 0.57144(10) 0.0289(6) Uani 1 1 d . . . . .
H32C H 0.4810 0.5464 0.5536 0.035 Uiso 1 1 calc R U . . .
O1C O 0.08959(14) 0.7152(5) 0.46318(14) 0.0449(12) Uani 0.522(3) 1 d . . P A 1
C1C C 0.2289(5) 0.268(3) 0.3362(6) 0.025(2) Uani 0.522(3) 1 d D . P A 1
C2C C 0.2327(6) 0.228(3) 0.2829(7) 0.029(3) Uani 0.522(3) 1 d D . P A 1
H2C H 0.2042 0.2260 0.2548 0.035 Uiso 0.522(3) 1 calc R U P A 1
C3C C 0.2832(7) 0.193(3) 0.2783(6) 0.027(2) Uani 0.522(3) 1 d D . P A 1
H3C H 0.2959 0.1615 0.2468 0.033 Uiso 0.522(3) 1 calc R U P A 1
C4C C 0.3139(4) 0.2114(19) 0.3288(5) 0.0211(19) Uani 0.522(3) 1 d D U P A 1
N1C N 0.2789(6) 0.259(3) 0.3621(7) 0.024(2) Uani 0.522(3) 1 d D . P A 1
H1C H 0.2879 0.2809 0.3958 0.029 Uiso 0.522(3) 1 calc R U P A 1
C15C C 0.2465(5) 0.6198(17) 0.5111(7) 0.025(2) Uani 0.522(3) 1 d D . P A 1
C16C C 0.2186(5) 0.5602(12) 0.4658(5) 0.0243(16) Uani 0.522(3) 1 d D U P A 1
C17C C 0.1636(5) 0.596(2) 0.4510(8) 0.032(2) Uani 0.522(3) 1 d D . P A 1
C18C C 0.1449(4) 0.5098(8) 0.4069(4) 0.0292(16) Uani 0.522(3) 1 d D U P A 1
C19C C 0.1902(5) 0.4236(17) 0.3992(6) 0.0252(18) Uani 0.522(3) 1 d D . P A 1
C20C C 0.1844(4) 0.3330(9) 0.3556(4) 0.0247(15) Uani 0.522(3) 1 d D U P A 1
N4C N 0.2347(5) 0.4602(11) 0.4327(5) 0.0244(17) Uani 0.522(3) 1 d D U P A 1
C33C C 0.2216(4) 0.7297(11) 0.5381(5) 0.0228(17) Uani 0.522(3) 1 d D . P A 1
C34C C 0.2461(4) 0.8086(13) 0.5813(4) 0.0237(18) Uani 0.522(3) 1 d D . P A 1
H34C H 0.2817 0.7886 0.5951 0.028 Uiso 0.522(3) 1 calc R U P A 1
C35C C 0.2202(4) 0.9141(12) 0.6044(4) 0.0343(18) Uani 0.522(3) 1 d D . P A 1
H35C H 0.2379 0.9656 0.6335 0.041 Uiso 0.522(3) 1 calc R U P A 1
C36C C 0.1683(4) 0.9446(13) 0.5850(4) 0.040(2) Uani 0.522(3) 1 d D . P A 1
H36C H 0.1505 1.0166 0.6013 0.048 Uiso 0.522(3) 1 calc R U P A 1
C37C C 0.1424(4) 0.8737(12) 0.5432(5) 0.038(2) Uani 0.522(3) 1 d D . P A 1
H37C H 0.1072 0.8977 0.5295 0.045 Uiso 0.522(3) 1 calc R U P A 1
C38C C 0.1683(4) 0.7644(12) 0.5203(4) 0.033(2) Uani 0.522(3) 1 d D . P A 1
N5C N 0.1384(5) 0.6916(13) 0.4773(4) 0.0356(19) Uani 0.522(3) 1 d D . P A 1
N6C N 0.0977(4) 0.5020(9) 0.3811(4) 0.0401(19) Uani 0.522(3) 1 d D . P A 1
C39C C 0.1302(3) 0.3104(9) 0.3298(4) 0.0299(16) Uani 0.522(3) 1 d D . P A 1
C40C C 0.0896(3) 0.4006(9) 0.3422(4) 0.0337(17) Uani 0.522(3) 1 d D . P A 1
C41C C 0.0382(3) 0.3866(9) 0.3159(3) 0.0445(19) Uani 0.522(3) 1 d D . P A 1
H41C H 0.0118 0.4514 0.3226 0.053 Uiso 0.522(3) 1 calc R U P A 1
C42C C 0.0260(3) 0.2808(9) 0.2809(3) 0.0438(18) Uani 0.522(3) 1 d D . P A 1
H42C H -0.0086 0.2752 0.2620 0.053 Uiso 0.522(3) 1 calc R U P A 1
C43C C 0.0634(3) 0.1798(8) 0.2722(3) 0.0359(14) Uani 0.522(3) 1 d D . P A 1
H43C H 0.0536 0.1018 0.2499 0.043 Uiso 0.522(3) 1 calc R U P A 1
C44C C 0.1151(3) 0.1950(10) 0.2965(4) 0.0350(18) Uani 0.522(3) 1 d D . P A 1
H44C H 0.1406 0.1268 0.2905 0.042 Uiso 0.522(3) 1 calc R U P A 1
O1D O 0.0544(2) 0.5065(6) 0.3789(2) 0.0684(17) Uani 0.478(3) 1 d . . P A 2
C1D C 0.2304(6) 0.245(3) 0.3234(7) 0.025(2) Uani 0.478(3) 1 d D . P A 2
C2D C 0.2348(7) 0.205(3) 0.2707(7) 0.029(3) Uani 0.478(3) 1 d D . P A 2
H2D H 0.2066 0.2015 0.2422 0.035 Uiso 0.478(3) 1 calc R U P A 2
C3D C 0.2861(7) 0.174(4) 0.2673(7) 0.027(2) Uani 0.478(3) 1 d D . P A 2
H3D H 0.3002 0.1460 0.2361 0.033 Uiso 0.478(3) 1 calc R U P A 2
C4D C 0.3148(4) 0.190(2) 0.3192(6) 0.0211(19) Uani 0.478(3) 1 d D . P A 2
N1D N 0.2791(7) 0.237(4) 0.3518(8) 0.024(2) Uani 0.478(3) 1 d D . P A 2
H1D H 0.2870 0.2588 0.3856 0.029 Uiso 0.478(3) 1 calc R U P A 2
C15D C 0.2425(6) 0.5856(19) 0.5022(8) 0.025(2) Uani 0.478(3) 1 d D . P A 2
C16D C 0.2152(5) 0.5273(13) 0.4554(5) 0.0243(16) Uani 0.478(3) 1 d D . P A 2
C17D C 0.1601(6) 0.558(2) 0.4397(9) 0.032(2) Uani 0.478(3) 1 d D . P A 2
C18D C 0.1423(4) 0.4599(9) 0.3989(5) 0.0292(16) Uani 0.478(3) 1 d D . P A 2
C19D C 0.1891(5) 0.3864(19) 0.3874(7) 0.0252(18) Uani 0.478(3) 1 d D . P A 2
C20D C 0.1860(4) 0.2908(10) 0.3462(4) 0.0247(15) Uani 0.478(3) 1 d D . P A 2
N4D N 0.2314(5) 0.4261(12) 0.4232(6) 0.0244(17) Uani 0.478(3) 1 d D . P A 2
C33D C 0.2124(4) 0.6962(13) 0.5247(6) 0.0228(17) Uani 0.478(3) 1 d D . P A 2
C34D C 0.2344(4) 0.7882(15) 0.5648(5) 0.0237(18) Uani 0.478(3) 1 d D . P A 2
H34D H 0.2708 0.7790 0.5776 0.028 Uiso 0.478(3) 1 calc R U P A 2
C35D C 0.2063(4) 0.8909(13) 0.5864(4) 0.0343(18) Uani 0.478(3) 1 d D . P A 2
H35D H 0.2230 0.9459 0.6150 0.041 Uiso 0.478(3) 1 calc R U P A 2
C36D C 0.1538(4) 0.9148(15) 0.5668(5) 0.040(2) Uani 0.478(3) 1 d D . P A 2
H36D H 0.1344 0.9864 0.5814 0.048 Uiso 0.478(3) 1 calc R U P A 2
C37D C 0.1306(4) 0.8329(14) 0.5261(5) 0.038(2) Uani 0.478(3) 1 d D . P A 2
H37D H 0.0947 0.8478 0.5124 0.045 Uiso 0.478(3) 1 calc R U P A 2
C38D C 0.1590(4) 0.7271(14) 0.5041(5) 0.033(2) Uani 0.478(3) 1 d D . P A 2
N5D N 0.1325(6) 0.6510(14) 0.4618(4) 0.0356(19) Uani 0.478(3) 1 d D . P A 2
N6D N 0.0949(4) 0.4403(11) 0.3704(5) 0.0401(19) Uani 0.478(3) 1 d D . P A 2
C39D C 0.1335(4) 0.2540(10) 0.3213(5) 0.0299(16) Uani 0.478(3) 1 d D . P A 2
C40D C 0.0895(3) 0.3342(9) 0.3321(4) 0.0337(17) Uani 0.478(3) 1 d D . P A 2
C41D C 0.0389(3) 0.3083(11) 0.3065(4) 0.0445(19) Uani 0.478(3) 1 d D . P A 2
H41D H 0.0103 0.3664 0.3128 0.053 Uiso 0.478(3) 1 calc R U P A 2
C42D C 0.0309(3) 0.1979(10) 0.2721(3) 0.0438(18) Uani 0.478(3) 1 d D . P A 2
H42D H -0.0034 0.1802 0.2541 0.053 Uiso 0.478(3) 1 calc R U P A 2
C43D C 0.0729(3) 0.1107(9) 0.2632(3) 0.0359(14) Uani 0.478(3) 1 d D . P A 2
H43D H 0.0666 0.0315 0.2407 0.043 Uiso 0.478(3) 1 calc R U P A 2
C44D C 0.1234(4) 0.1404(11) 0.2874(5) 0.0350(18) Uani 0.478(3) 1 d D . P A 2
H44D H 0.1518 0.0819 0.2806 0.042 Uiso 0.478(3) 1 calc R U P A 2
N1A N 0.11455(8) 0.1415(2) 0.45459(8) 0.0302(5) Uani 1 1 d . . . . .
H1A H 0.1460 0.1285 0.4450 0.036 Uiso 1 1 calc R U . . .
N2A N 0.15931(8) -0.0676(2) 0.38889(8) 0.0300(5) Uani 1 1 d . . . . .
N3A N 0.26418(8) -0.0420(2) 0.44722(8) 0.0263(5) Uani 1 1 d . . . . .
H3A1 H 0.2321 -0.0170 0.4520 0.032 Uiso 1 1 calc R U . . .
N4A N 0.22036(8) 0.1690(2) 0.51070(8) 0.0277(5) Uani 1 1 d . . . . .
N5A N 0.31322(9) 0.2188(2) 0.62780(9) 0.0296(5) Uani 1 1 d . . . . .
N6A N 0.21105(9) 0.4002(2) 0.61963(8) 0.0290(5) Uani 1 1 d . . . . .
N2C N 0.37443(8) 0.2751(2) 0.43033(8) 0.0254(5) Uani 1 1 d . . . . .
N3C N 0.32559(8) 0.4682(2) 0.50212(9) 0.0294(5) Uani 1 1 d . . . . .
H3C1 H 0.3173 0.4429 0.4687 0.035 Uiso 1 1 calc R U . . .
O1A O 0.3235(3) 0.2901(9) 0.6661(3) 0.050(3) Uani 0.266(5) 1 d . . P B 1
O1B O 0.23859(10) 0.4376(3) 0.66258(10) 0.0350(9) Uani 0.734(5) 1 d . . P B 2
 
loop_
 _atom_site_aniso_label
 _atom_site_aniso_U_11
 _atom_site_aniso_U_22
 _atom_site_aniso_U_33
 _atom_site_aniso_U_23
 _atom_site_aniso_U_13
 _atom_site_aniso_U_12
C1A 0.0268(16) 0.0408(18) 0.0295(15) -0.0009(13) -0.0010(12) 0.0082(13)
C2A 0.0255(16) 0.061(2) 0.0269(15) -0.0089(14) -0.0002(12) 0.0081(15)
C3A 0.0211(15) 0.057(2) 0.0250(15) -0.0049(14) -0.0034(12) 0.0049(14)
C4A 0.0171(14) 0.053(2) 0.0231(14) -0.0017(13) -0.0022(11) 0.0025(13)
C5A 0.0217(15) 0.050(2) 0.0260(15) -0.0041(13) 0.0009(12) 0.0030(13)
C6A 0.0223(15) 0.054(2) 0.0290(15) -0.0056(14) 0.0015(12) 0.0008(14)
C7A 0.0209(16) 0.074(3) 0.0389(18) -0.0226(16) -0.0011(13) -0.0016(16)
C8A 0.0285(17) 0.063(2) 0.0364(17) -0.0214(16) 0.0027(13) 0.0025(15)
C9A 0.0212(15) 0.0440(19) 0.0301(15) -0.0035(13) 0.0029(12) 0.0017(13)
C10A 0.0228(15) 0.0305(16) 0.0328(15) 0.0008(12) 0.0038(12) 0.0032(12)
C11A 0.0201(14) 0.0306(16) 0.0306(15) 0.0025(12) 0.0055(12) 0.0021(12)
C12A 0.0191(14) 0.0320(16) 0.0398(17) 0.0001(13) 0.0077(12) 0.0000(12)
C13A 0.0184(14) 0.0302(16) 0.0405(17) 0.0044(13) 0.0020(12) -0.0028(12)
C14A 0.0196(14) 0.0279(15) 0.0326(15) 0.0071(12) 0.0007(12) -0.0013(12)
C15A 0.0185(14) 0.0258(15) 0.0321(15) 0.0069(12) -0.0003(11) -0.0041(12)
C16A 0.0206(14) 0.0305(16) 0.0250(14) 0.0055(11) -0.0016(11) -0.0031(12)
C17A 0.0236(15) 0.0278(15) 0.0255(14) 0.0031(11) -0.0002(12) -0.0064(12)
C18A 0.0211(14) 0.0318(16) 0.0268(14) 0.0032(12) 0.0020(11) -0.0040(12)
C19A 0.0238(15) 0.0301(16) 0.0257(14) 0.0017(11) 0.0029(12) -0.0011(12)
C20A 0.0254(15) 0.0411(18) 0.0240(14) 0.0005(12) -0.0003(12) 0.0039(13)
C21A 0.0200(15) 0.055(2) 0.0263(15) -0.0117(14) 0.0030(12) 0.0027(14)
C22A 0.0234(15) 0.058(2) 0.0294(15) -0.0161(14) 0.0004(12) 0.0046(15)
C23A 0.0241(16) 0.068(3) 0.0415(18) -0.0243(17) -0.0030(13) 0.0114(16)
C24A 0.0196(16) 0.077(3) 0.047(2) -0.0312(18) 0.0009(14) 0.0018(17)
C25A 0.0284(17) 0.061(2) 0.0384(17) -0.0201(16) 0.0064(14) -0.0044(16)
C26A 0.0279(16) 0.055(2) 0.0324(16) -0.0076(15) 0.0044(13) 0.0007(15)
C27A 0.0195(14) 0.0325(17) 0.0378(16) -0.0061(13) 0.0058(12) 0.0005(12)
C28A 0.0273(16) 0.0385(18) 0.0373(17) -0.0080(14) 0.0045(13) 0.0050(13)
C29A 0.0395(18) 0.045(2) 0.0414(18) -0.0086(15) 0.0122(14) -0.0010(16)
C30A 0.041(2) 0.056(2) 0.058(2) -0.0231(18) 0.0158(17) 0.0062(17)
C31A 0.0358(19) 0.0354(19) 0.072(2) -0.0140(17) 0.0104(17) 0.0075(15)
C32A 0.0300(17) 0.0314(17) 0.0510(19) 0.0008(14) 0.0079(14) -0.0011(14)
C33A 0.0184(14) 0.0291(16) 0.0336(15) 0.0074(12) -0.0008(12) -0.0075(12)
C34A 0.0212(15) 0.0349(17) 0.0434(17) 0.0093(13) 0.0008(13) -0.0041(13)
C35A 0.0206(15) 0.0382(19) 0.054(2) 0.0213(15) -0.0032(14) -0.0040(13)
C36A 0.0237(16) 0.050(2) 0.0423(18) 0.0211(16) -0.0091(13) -0.0114(15)
C37A 0.0267(16) 0.045(2) 0.0340(16) 0.0093(14) -0.0056(13) -0.0118(14)
C38A 0.0267(15) 0.0330(17) 0.0305(15) 0.0105(13) -0.0040(12) -0.0122(13)
C39A 0.0291(16) 0.0432(19) 0.0297(15) 0.0007(13) 0.0038(13) 0.0016(14)
C40A 0.0280(16) 0.0368(17) 0.0322(16) 0.0001(13) 0.0057(13) -0.0011(13)
C41A 0.0380(18) 0.0408(19) 0.0381(17) -0.0070(14) 0.0071(14) -0.0027(15)
C42A 0.044(2) 0.046(2) 0.050(2) -0.0100(16) 0.0106(16) 0.0036(17)
C43A 0.044(2) 0.056(2) 0.048(2) -0.0030(17) 0.0080(16) 0.0153(17)
C44A 0.0376(18) 0.050(2) 0.0377(17) -0.0043(15) 0.0004(14) 0.0125(16)
C5C 0.0272(15) 0.0285(16) 0.0287(15) 0.0058(12) 0.0006(12) -0.0020(12)
C6C 0.0215(14) 0.0235(15) 0.0253(14) 0.0060(11) 0.0001(11) -0.0007(11)
C7C 0.0191(14) 0.0278(15) 0.0303(15) 0.0045(12) 0.0030(11) -0.0014(12)
C8C 0.0167(13) 0.0255(15) 0.0285(15) 0.0034(11) -0.0026(11) 0.0004(11)
C9C 0.0184(14) 0.0268(15) 0.0260(14) 0.0056(11) 0.0008(11) 0.0005(11)
C10C 0.0207(14) 0.0205(14) 0.0288(14) 0.0070(11) 0.0019(11) -0.0034(11)
C11C 0.0227(14) 0.0233(15) 0.0328(15) 0.0042(12) 0.0048(12) -0.0015(12)
C12C 0.0282(15) 0.0214(15) 0.0368(16) 0.0013(12) 0.0047(12) -0.0031(12)
C13C 0.0303(16) 0.0262(16) 0.0422(17) 0.0038(13) 0.0143(13) 0.0013(13)
C14C 0.0263(15) 0.0283(16) 0.0486(18) 0.0140(13) 0.0159(14) 0.0063(13)
C21C 0.0271(15) 0.0367(17) 0.0240(14) 0.0068(12) -0.0047(12) 0.0017(13)
C22C 0.0309(16) 0.0447(19) 0.0280(15) 0.0002(13) -0.0013(13) 0.0003(14)
C23C 0.0403(19) 0.049(2) 0.0363(17) -0.0044(15) -0.0055(15) 0.0077(16)
C24C 0.0359(18) 0.074(3) 0.0278(17) 0.0069(16) 0.0009(14) 0.0162(18)
C25C 0.0285(17) 0.060(2) 0.0339(17) 0.0150(16) 0.0025(13) 0.0049(16)
C26C 0.0300(16) 0.0458(19) 0.0268(15) 0.0110(13) -0.0031(13) 0.0014(14)
C27C 0.0185(13) 0.0262(15) 0.0241(13) 0.0022(11) 0.0048(11) 0.0013(11)
C28C 0.0239(14) 0.0221(15) 0.0319(15) 0.0003(11) -0.0012(12) -0.0038(12)
C29C 0.0287(15) 0.0240(15) 0.0342(16) 0.0024(12) -0.0040(12) 0.0029(12)
C30C 0.0184(14) 0.0398(18) 0.0277(15) -0.0028(12) -0.0011(11) 0.0024(13)
C31C 0.0279(16) 0.0300(17) 0.0371(16) 0.0017(13) 0.0036(13) -0.0082(13)
C32C 0.0313(16) 0.0245(15) 0.0308(15) 0.0030(12) 0.0043(12) -0.0054(12)
O1C 0.018(2) 0.082(3) 0.033(2) 0.008(2) -0.0004(16) 0.028(2)
C1C 0.0267(18) 0.040(7) 0.007(7) -0.003(5) -0.004(3) -0.003(2)
C2C 0.028(2) 0.041(8) 0.015(7) 0.000(5) -0.008(4) -0.002(3)
C3C 0.031(2) 0.036(8) 0.014(5) -0.006(5) 0.000(3) 0.002(2)
C4C 0.0277(15) 0.021(4) 0.013(4) -0.004(3) -0.0009(18) -0.0019(16)
N1C 0.0234(13) 0.037(8) 0.010(6) -0.006(4) -0.005(3) -0.001(2)
C15C 0.028(2) 0.009(7) 0.041(5) 0.004(3) 0.014(2) 0.003(4)
C16C 0.0263(19) 0.026(4) 0.022(4) 0.003(3) 0.008(2) 0.008(3)
C17C 0.029(2) 0.045(10) 0.023(7) 0.003(4) 0.008(3) 0.016(4)
C18C 0.0216(18) 0.035(4) 0.031(3) 0.007(3) 0.0022(18) 0.004(3)
C19C 0.0218(17) 0.039(8) 0.015(6) -0.004(3) 0.001(3) 0.005(3)
C20C 0.0209(16) 0.030(4) 0.022(3) -0.002(3) -0.0010(18) 0.004(3)
N4C 0.0223(17) 0.028(4) 0.022(4) 0.002(3) -0.001(2) 0.002(3)
C33C 0.027(4) 0.014(5) 0.028(6) -0.004(3) 0.006(3) -0.003(3)
C34C 0.027(4) 0.019(4) 0.025(7) 0.003(3) 0.004(3) 0.002(3)
C35C 0.045(5) 0.029(4) 0.032(6) 0.003(3) 0.017(4) -0.003(3)
C36C 0.047(6) 0.041(6) 0.035(7) 0.008(4) 0.014(4) 0.017(4)
C37C 0.030(5) 0.045(7) 0.040(7) 0.008(4) 0.012(4) 0.013(4)
C38C 0.036(4) 0.037(6) 0.027(7) 0.003(3) 0.011(4) 0.010(4)
N5C 0.039(3) 0.050(7) 0.020(6) 0.002(3) 0.012(4) 0.026(4)
N6C 0.0183(19) 0.066(7) 0.036(4) 0.005(4) 0.003(2) 0.011(4)
C39C 0.023(2) 0.038(6) 0.028(4) 0.006(4) 0.000(2) 0.004(4)
C40C 0.025(2) 0.045(6) 0.030(4) 0.010(4) -0.001(2) 0.006(4)
C41C 0.022(2) 0.078(7) 0.032(3) 0.003(4) -0.002(2) 0.010(4)
C42C 0.021(2) 0.073(6) 0.036(3) 0.012(4) -0.003(2) 0.004(4)
C43C 0.028(3) 0.050(5) 0.028(3) 0.001(3) 0.001(2) 0.000(3)
C44C 0.023(3) 0.053(7) 0.028(4) 0.009(4) 0.001(2) 0.003(3)
O1D 0.047(3) 0.076(4) 0.082(4) -0.020(3) 0.011(3) 0.024(3)
C1D 0.0267(18) 0.040(7) 0.007(7) -0.003(5) -0.004(3) -0.003(2)
C2D 0.028(2) 0.041(8) 0.015(7) 0.000(5) -0.008(4) -0.002(3)
C3D 0.031(2) 0.036(8) 0.014(5) -0.006(5) 0.000(3) 0.002(2)
C4D 0.0277(15) 0.021(4) 0.013(4) -0.004(3) -0.0009(18) -0.0019(16)
N1D 0.0234(13) 0.037(8) 0.010(6) -0.006(4) -0.005(3) -0.001(2)
C15D 0.028(2) 0.009(7) 0.041(5) 0.004(3) 0.014(2) 0.003(4)
C16D 0.0263(19) 0.026(4) 0.022(4) 0.003(3) 0.008(2) 0.008(3)
C17D 0.029(2) 0.045(10) 0.023(7) 0.003(4) 0.008(3) 0.016(4)
C18D 0.0216(18) 0.035(4) 0.031(3) 0.007(3) 0.0022(18) 0.004(3)
C19D 0.0218(17) 0.039(8) 0.015(6) -0.004(3) 0.001(3) 0.005(3)
C20D 0.0209(16) 0.030(4) 0.022(3) -0.002(3) -0.0010(18) 0.004(3)
N4D 0.0223(17) 0.028(4) 0.022(4) 0.002(3) -0.001(2) 0.002(3)
C33D 0.027(4) 0.014(5) 0.028(6) -0.004(3) 0.006(3) -0.003(3)
C34D 0.027(4) 0.019(4) 0.025(7) 0.003(3) 0.004(3) 0.002(3)
C35D 0.045(5) 0.029(4) 0.032(6) 0.003(3) 0.017(4) -0.003(3)
C36D 0.047(6) 0.041(6) 0.035(7) 0.008(4) 0.014(4) 0.017(4)
C37D 0.030(5) 0.045(7) 0.040(7) 0.008(4) 0.012(4) 0.013(4)
C38D 0.036(4) 0.037(6) 0.027(7) 0.003(3) 0.011(4) 0.010(4)
N5D 0.039(3) 0.050(7) 0.020(6) 0.002(3) 0.012(4) 0.026(4)
N6D 0.0183(19) 0.066(7) 0.036(4) 0.005(4) 0.003(2) 0.011(4)
C39D 0.023(2) 0.038(6) 0.028(4) 0.006(4) 0.000(2) 0.004(4)
C40D 0.025(2) 0.045(6) 0.030(4) 0.010(4) -0.001(2) 0.006(4)
C41D 0.022(2) 0.078(7) 0.032(3) 0.003(4) -0.002(2) 0.010(4)
C42D 0.021(2) 0.073(6) 0.036(3) 0.012(4) -0.003(2) 0.004(4)
C43D 0.028(3) 0.050(5) 0.028(3) 0.001(3) 0.001(2) 0.000(3)
C44D 0.023(3) 0.053(7) 0.028(4) 0.009(4) 0.001(2) 0.003(3)
N1A 0.0186(12) 0.0425(15) 0.0289(12) -0.0027(11) 0.0008(10) 0.0056(11)
N2A 0.0197(12) 0.0419(15) 0.0292(12) -0.0009(10) 0.0061(10) 0.0023(11)
N3A 0.0166(11) 0.0313(13) 0.0310(12) -0.0013(10) 0.0034(10) 0.0018(10)
N4A 0.0223(12) 0.0312(13) 0.0290(12) 0.0031(10) 0.0009(10) 0.0019(10)
N5A 0.0240(13) 0.0315(14) 0.0312(14) 0.0049(11) -0.0036(11) -0.0065(11)
N6A 0.0281(13) 0.0339(14) 0.0248(12) -0.0004(10) 0.0027(10) -0.0080(11)
N2C 0.0200(12) 0.0266(13) 0.0287(12) 0.0054(10) 0.0007(10) 0.0016(10)
N3C 0.0244(12) 0.0308(14) 0.0333(13) 0.0089(10) 0.0051(10) 0.0059(10)
O1A 0.038(5) 0.070(7) 0.042(5) -0.011(5) 0.000(4) -0.015(4)
O1B 0.0315(16) 0.0429(18) 0.0284(16) -0.0038(12) -0.0043(12) -0.0031(13)
 
_geom_special_details
;
 All esds (except the esd in the dihedral angle between two l.s. planes)
 are estimated using the full covariance matrix.  The cell esds are taken
 into account individually in the estimation of esds in distances, angles
 and torsion angles; correlations between esds in cell parameters are only
 used when they are defined by crystal symmetry.  An approximate (isotropic)
 treatment of cell esds is used for estimating esds involving l.s. planes.
;
 
loop_
 _geom_bond_atom_site_label_1
 _geom_bond_atom_site_label_2
 _geom_bond_distance
 _geom_bond_site_symmetry_2
 _geom_bond_publ_flag
C1A N1A 1.362(3) . ?
C1A C20A 1.428(4) . ?
C1A C2A 1.430(4) . ?
C2A C3A 1.363(4) . ?
C2A H2A 0.9500 . ?
C3A C4A 1.423(4) . ?
C3A H3A 0.9500 . ?
C4A N1A 1.381(3) . ?
C4A C5A 1.387(4) . ?
C5A C6A 1.425(4) . ?
C5A C21A 1.494(4) . ?
C6A N2A 1.360(3) . ?
C6A C7A 1.436(4) . ?
C7A C8A 1.347(4) . ?
C7A H7A 0.9500 . ?
C8A C9A 1.436(4) . ?
C8A H8A 0.9500 . ?
C9A N2A 1.378(3) . ?
C9A C10A 1.407(4) . ?
C10A C11A 1.398(4) . ?
C10A C27A 1.493(4) . ?
C11A N3A 1.384(3) . ?
C11A C12A 1.424(4) . ?
C12A C13A 1.359(4) . ?
C12A H12A 0.9500 . ?
C13A C14A 1.422(4) . ?
C13A H13A 0.9500 . ?
C14A N3A 1.349(3) . ?
C14A C15A 1.433(4) . ?
C15A C16A 1.393(4) . ?
C15A C33A 1.454(4) . ?
C16A N4A 1.373(3) . ?
C16A C17A 1.445(4) . ?
C17A N5A 1.309(3) . ?
C17A C18A 1.436(4) . ?
C18A N6A 1.326(3) . ?
C18A C19A 1.443(4) . ?
C19A N4A 1.364(3) . ?
C19A C20A 1.399(4) . ?
C20A C39A 1.449(4) . ?
C21A C26A 1.386(4) . ?
C21A C22A 1.396(4) . ?
C22A C23A 1.394(4) . ?
C22A H22A 0.9500 . ?
C23A C24A 1.376(5) . ?
C23A H23A 0.9500 . ?
C24A C25A 1.375(4) . ?
C24A H24A 0.9500 . ?
C25A C26A 1.389(4) . ?
C25A H25A 0.9500 . ?
C26A H26A 0.9500 . ?
C27A C32A 1.384(4) . ?
C27A C28A 1.401(4) . ?
C28A C29A 1.379(4) . ?
C28A H28A 0.9500 . ?
C29A C30A 1.375(4) . ?
C29A H29A 0.9500 . ?
C30A C31A 1.385(5) . ?
C30A H30A 0.9500 . ?
C31A C32A 1.390(4) . ?
C31A H31A 0.9500 . ?
C32A H32A 0.9500 . ?
C33A C38A 1.418(4) . ?
C33A C34A 1.419(4) . ?
C34A C35A 1.381(4) . ?
C34A H34A 0.9500 . ?
C35A C36A 1.402(4) . ?
C35A H35A 0.9500 . ?
C36A C37A 1.361(4) . ?
C36A H36A 0.9500 . ?
C37A C38A 1.405(4) . ?
C37A H37A 0.9500 . ?
C38A N5A 1.393(4) . ?
C39A C44A 1.409(4) . ?
C39A C40A 1.415(4) . ?
C40A C41A 1.404(4) . ?
C40A N6A 1.410(3) . ?
C41A C42A 1.363(4) . ?
C41A H41A 0.9500 . ?
C42A C43A 1.387(4) . ?
C42A H42A 0.9500 . ?
C43A C44A 1.373(4) . ?
C43A H43A 0.9500 . ?
C44A H44A 0.9500 . ?
C5C C4D 1.390(10) . ?
C5C C4C 1.408(9) . ?
C5C C6C 1.410(4) . ?
C5C C21C 1.495(4) . ?
C6C N2C 1.372(3) . ?
C6C C7C 1.438(3) . ?
C7C C8C 1.343(3) . ?
C7C H7C 0.9500 . ?
C8C C9C 1.446(3) . ?
C8C H8C 0.9500 . ?
C9C N2C 1.372(3) . ?
C9C C10C 1.410(4) . ?
C10C C11C 1.391(3) . ?
C10C C27C 1.502(3) . ?
C11C N3C 1.383(3) . ?
C11C C12C 1.420(4) . ?
C12C C13C 1.362(4) . ?
C12C H12C 0.9500 . ?
C13C C14C 1.423(4) . ?
C13C H13C 0.9500 . ?
C14C N3C 1.369(3) . ?
C14C C15C 1.428(9) . ?
C14C C15D 1.467(10) . ?
C21C C22C 1.391(4) . ?
C21C C26C 1.398(4) . ?
C22C C23C 1.385(4) . ?
C22C H22C 0.9500 . ?
C23C C24C 1.385(4) . ?
C23C H23C 0.9500 . ?
C24C C25C 1.391(5) . ?
C24C H24C 0.9500 . ?
C25C C26C 1.379(4) . ?
C25C H25C 0.9500 . ?
C26C H26C 0.9500 . ?
C27C C32C 1.382(4) . ?
C27C C28C 1.400(3) . ?
C28C C29C 1.384(3) . ?
C28C H28C 0.9500 . ?
C29C C30C 1.382(4) . ?
C29C H29C 0.9500 . ?
C30C C31C 1.379(4) . ?
C30C H30C 0.9500 . ?
C31C C32C 1.402(4) . ?
C31C H31C 0.9500 . ?
C32C H32C 0.9500 . ?
O1C N5C 1.273(13) . ?
C1C N1C 1.361(10) . ?
C1C C2C 1.421(9) . ?
C1C C20C 1.441(9) . ?
C2C C3C 1.357(10) . ?
C2C H2C 0.9500 . ?
C3C C4C 1.421(10) . ?
C3C H3C 0.9500 . ?
C4C N1C 1.389(10) . ?
N1C H1C 0.8800 . ?
C15C C16C 1.392(9) . ?
C15C C33C 1.448(9) . ?
C16C N4C 1.373(12) . ?
C16C C17C 1.449(10) . ?
C17C N5C 1.348(11) . ?
C17C C18C 1.420(9) . ?
C18C N6C 1.296(12) . ?
C18C C19C 1.457(10) . ?
C19C N4C 1.373(13) . ?
C19C C20C 1.397(8) . ?
C20C C39C 1.468(9) . ?
C33C C34C 1.408(8) . ?
C33C C38C 1.420(9) . ?
C34C C35C 1.380(9) . ?
C34C H34C 0.9500 . ?
C35C C36C 1.384(10) . ?
C35C H35C 0.9500 . ?
C36C C37C 1.355(9) . ?
C36C H36C 0.9500 . ?
C37C C38C 1.405(9) . ?
C37C H37C 0.9500 . ?
C38C N5C 1.426(9) . ?
N6C C40C 1.380(9) . ?
C39C C44C 1.414(9) . ?
C39C C40C 1.419(9) . ?
C40C C41C 1.398(9) . ?
C41C C42C 1.355(10) . ?
C41C H41C 0.9500 . ?
C42C C43C 1.399(9) . ?
C42C H42C 0.9500 . ?
C43C C44C 1.390(9) . ?
C43C H43C 0.9500 . ?
C44C H44C 0.9500 . ?
O1D N6D 1.258(11) . ?
C1D N1D 1.356(11) . ?
C1D C2D 1.409(10) . ?
C1D C20D 1.413(10) . ?
C2D C3D 1.362(11) . ?
C2D H2D 0.9500 . ?
C3D C4D 1.427(11) . ?
C3D H3D 0.9500 . ?
C4D N1D 1.387(11) . ?
N1D H1D 0.8800 . ?
C15D C16D 1.410(10) . ?
C15D C33D 1.469(10) . ?
C16D N4D 1.367(13) . ?
C16D C17D 1.443(10) . ?
C17D N5D 1.308(13) . ?
C17D C18D 1.428(10) . ?
C18D N6D 1.338(13) . ?
C18D C19D 1.452(10) . ?
C19D N4D 1.370(15) . ?
C19D C20D 1.383(9) . ?
C20D C39D 1.450(10) . ?
C33D C34D 1.403(8) . ?
C33D C38D 1.427(10) . ?
C34D C35D 1.375(10) . ?
C34D H34D 0.9500 . ?
C35D C36D 1.388(11) . ?
C35D H35D 0.9500 . ?
C36D C37D 1.367(10) . ?
C36D H36D 0.9500 . ?
C37D C38D 1.405(10) . ?
C37D H37D 0.9500 . ?
C38D N5D 1.395(10) . ?
N6D C40D 1.400(9) . ?
C39D C44D 1.389(9) . ?
C39D C40D 1.420(9) . ?
C40D C41D 1.391(10) . ?
C41D C42D 1.367(11) . ?
C41D H41D 0.9500 . ?
C42D C43D 1.403(9) . ?
C42D H42D 0.9500 . ?
C43D C44D 1.385(10) . ?
C43D H43D 0.9500 . ?
C44D H44D 0.9500 . ?
N1A H1A 0.8800 . ?
N3A H3A1 0.8800 . ?
N5A O1A 1.188(8) . ?
N6A O1B 1.267(3) . ?
N3C H3C1 0.8800 . ?
 
loop_
 _geom_angle_atom_site_label_1
 _geom_angle_atom_site_label_2
 _geom_angle_atom_site_label_3
 _geom_angle
 _geom_angle_site_symmetry_1
 _geom_angle_site_symmetry_3
 _geom_angle_publ_flag
N1A C1A C20A 124.4(2) . . ?
N1A C1A C2A 107.6(2) . . ?
C20A C1A C2A 127.4(3) . . ?
C3A C2A C1A 107.4(2) . . ?
C3A C2A H2A 126.3 . . ?
C1A C2A H2A 126.3 . . ?
C2A C3A C4A 108.5(3) . . ?
C2A C3A H3A 125.8 . . ?
C4A C3A H3A 125.8 . . ?
N1A C4A C5A 127.1(2) . . ?
N1A C4A C3A 106.7(2) . . ?
C5A C4A C3A 126.2(3) . . ?
C4A C5A C6A 125.4(3) . . ?
C4A C5A C21A 116.9(2) . . ?
C6A C5A C21A 117.7(2) . . ?
N2A C6A C5A 125.2(3) . . ?
N2A C6A C7A 110.5(2) . . ?
C5A C6A C7A 124.3(3) . . ?
C8A C7A C6A 107.1(3) . . ?
C8A C7A H7A 126.4 . . ?
C6A C7A H7A 126.4 . . ?
C7A C8A C9A 106.6(3) . . ?
C7A C8A H8A 126.7 . . ?
C9A C8A H8A 126.7 . . ?
N2A C9A C10A 125.6(2) . . ?
N2A C9A C8A 110.2(2) . . ?
C10A C9A C8A 124.1(3) . . ?
C11A C10A C9A 125.4(2) . . ?
C11A C10A C27A 117.5(2) . . ?
C9A C10A C27A 117.0(2) . . ?
N3A C11A C10A 125.3(2) . . ?
N3A C11A C12A 106.5(2) . . ?
C10A C11A C12A 128.1(2) . . ?
C13A C12A C11A 108.2(2) . . ?
C13A C12A H12A 125.9 . . ?
C11A C12A H12A 125.9 . . ?
C12A C13A C14A 107.6(2) . . ?
C12A C13A H13A 126.2 . . ?
C14A C13A H13A 126.2 . . ?
N3A C14A C13A 108.0(2) . . ?
N3A C14A C15A 123.3(2) . . ?
C13A C14A C15A 128.5(2) . . ?
C16A C15A C14A 123.0(2) . . ?
C16A C15A C33A 114.7(2) . . ?
C14A C15A C33A 122.2(2) . . ?
N4A C16A C15A 128.9(2) . . ?
N4A C16A C17A 111.3(2) . . ?
C15A C16A C17A 119.8(2) . . ?
N5A C17A C18A 129.5(2) . . ?
N5A C17A C16A 125.6(2) . . ?
C18A C17A C16A 104.8(2) . . ?
N6A C18A C17A 130.0(2) . . ?
N6A C18A C19A 123.9(2) . . ?
C17A C18A C19A 105.8(2) . . ?
N4A C19A C20A 128.8(2) . . ?
N4A C19A C18A 111.0(2) . . ?
C20A C19A C18A 119.7(2) . . ?
C19A C20A C1A 122.2(3) . . ?
C19A C20A C39A 115.8(2) . . ?
C1A C20A C39A 121.2(2) . . ?
C26A C21A C22A 118.9(3) . . ?
C26A C21A C5A 121.2(3) . . ?
C22A C21A C5A 120.0(3) . . ?
C23A C22A C21A 120.6(3) . . ?
C23A C22A H22A 119.7 . . ?
C21A C22A H22A 119.7 . . ?
C24A C23A C22A 119.7(3) . . ?
C24A C23A H23A 120.2 . . ?
C22A C23A H23A 120.2 . . ?
C25A C24A C23A 120.1(3) . . ?
C25A C24A H24A 119.9 . . ?
C23A C24A H24A 119.9 . . ?
C24A C25A C26A 120.7(3) . . ?
C24A C25A H25A 119.7 . . ?
C26A C25A H25A 119.7 . . ?
C21A C26A C25A 120.1(3) . . ?
C21A C26A H26A 119.9 . . ?
C25A C26A H26A 119.9 . . ?
C32A C27A C28A 118.9(3) . . ?
C32A C27A C10A 122.0(3) . . ?
C28A C27A C10A 119.1(2) . . ?
C29A C28A C27A 120.6(3) . . ?
C29A C28A H28A 119.7 . . ?
C27A C28A H28A 119.7 . . ?
C30A C29A C28A 119.9(3) . . ?
C30A C29A H29A 120.1 . . ?
C28A C29A H29A 120.1 . . ?
C29A C30A C31A 120.5(3) . . ?
C29A C30A H30A 119.7 . . ?
C31A C30A H30A 119.7 . . ?
C30A C31A C32A 119.7(3) . . ?
C30A C31A H31A 120.1 . . ?
C32A C31A H31A 120.1 . . ?
C27A C32A C31A 120.4(3) . . ?
C27A C32A H32A 119.8 . . ?
C31A C32A H32A 119.8 . . ?
C38A C33A C34A 116.7(2) . . ?
C38A C33A C15A 120.1(2) . . ?
C34A C33A C15A 122.9(3) . . ?
C35A C34A C33A 121.3(3) . . ?
C35A C34A H34A 119.3 . . ?
C33A C34A H34A 119.3 . . ?
C34A C35A C36A 120.3(3) . . ?
C34A C35A H35A 119.9 . . ?
C36A C35A H35A 119.9 . . ?
C37A C36A C35A 120.0(3) . . ?
C37A C36A H36A 120.0 . . ?
C35A C36A H36A 120.0 . . ?
C36A C37A C38A 120.5(3) . . ?
C36A C37A H37A 119.8 . . ?
C38A C37A H37A 119.8 . . ?
N5A C38A C37A 116.2(3) . . ?
N5A C38A C33A 122.8(2) . . ?
C37A C38A C33A 120.9(3) . . ?
C44A C39A C40A 115.5(3) . . ?
C44A C39A C20A 123.8(3) . . ?
C40A C39A C20A 120.7(3) . . ?
C41A C40A N6A 117.1(2) . . ?
C41A C40A C39A 121.9(3) . . ?
N6A C40A C39A 120.9(2) . . ?
C42A C41A C40A 119.7(3) . . ?
C42A C41A H41A 120.2 . . ?
C40A C41A H41A 120.2 . . ?
C41A C42A C43A 120.0(3) . . ?
C41A C42A H42A 120.0 . . ?
C43A C42A H42A 120.0 . . ?
C44A C43A C42A 120.6(3) . . ?
C44A C43A H43A 119.7 . . ?
C42A C43A H43A 119.7 . . ?
C43A C44A C39A 122.0(3) . . ?
C43A C44A H44A 119.0 . . ?
C39A C44A H44A 119.0 . . ?
C4D C5C C6C 131.8(6) . . ?
C4C C5C C6C 119.3(5) . . ?
C4D C5C C21C 110.0(6) . . ?
C4C C5C C21C 122.5(5) . . ?
C6C C5C C21C 118.2(2) . . ?
N2C C6C C5C 124.9(2) . . ?
N2C C6C C7C 110.8(2) . . ?
C5C C6C C7C 124.3(2) . . ?
C8C C7C C6C 107.1(2) . . ?
C8C C7C H7C 126.5 . . ?
C6C C7C H7C 126.5 . . ?
C7C C8C C9C 106.5(2) . . ?
C7C C8C H8C 126.7 . . ?
C9C C8C H8C 126.7 . . ?
N2C C9C C10C 125.2(2) . . ?
N2C C9C C8C 110.7(2) . . ?
C10C C9C C8C 123.9(2) . . ?
C11C C10C C9C 126.9(2) . . ?
C11C C10C C27C 115.8(2) . . ?
C9C C10C C27C 117.3(2) . . ?
N3C C11C C10C 127.8(2) . . ?
N3C C11C C12C 106.1(2) . . ?
C10C C11C C12C 126.1(2) . . ?
C13C C12C C11C 108.7(2) . . ?
C13C C12C H12C 125.7 . . ?
C11C C12C H12C 125.7 . . ?
C12C C13C C14C 108.2(2) . . ?
C12C C13C H13C 125.9 . . ?
C14C C13C H13C 125.9 . . ?
N3C C14C C13C 106.6(2) . . ?
N3C C14C C15C 129.0(6) . . ?
C13C C14C C15C 124.4(6) . . ?
N3C C14C C15D 116.0(6) . . ?
C13C C14C C15D 136.5(8) . . ?
C22C C21C C26C 118.8(3) . . ?
C22C C21C C5C 120.9(2) . . ?
C26C C21C C5C 120.3(3) . . ?
C23C C22C C21C 120.6(3) . . ?
C23C C22C H22C 119.7 . . ?
C21C C22C H22C 119.7 . . ?
C22C C23C C24C 120.0(3) . . ?
C22C C23C H23C 120.0 . . ?
C24C C23C H23C 120.0 . . ?
C23C C24C C25C 119.9(3) . . ?
C23C C24C H24C 120.0 . . ?
C25C C24C H24C 120.0 . . ?
C26C C25C C24C 119.9(3) . . ?
C26C C25C H25C 120.0 . . ?
C24C C25C H25C 120.0 . . ?
C25C C26C C21C 120.7(3) . . ?
C25C C26C H26C 119.7 . . ?
C21C C26C H26C 119.7 . . ?
C32C C27C C28C 119.0(2) . . ?
C32C C27C C10C 119.6(2) . . ?
C28C C27C C10C 121.4(2) . . ?
C29C C28C C27C 120.1(2) . . ?
C29C C28C H28C 119.9 . . ?
C27C C28C H28C 119.9 . . ?
C30C C29C C28C 120.6(3) . . ?
C30C C29C H29C 119.7 . . ?
C28C C29C H29C 119.7 . . ?
C31C C30C C29C 119.8(2) . . ?
C31C C30C H30C 120.1 . . ?
C29C C30C H30C 120.1 . . ?
C30C C31C C32C 119.8(3) . . ?
C30C C31C H31C 120.1 . . ?
C32C C31C H31C 120.1 . . ?
C27C C32C C31C 120.6(3) . . ?
C27C C32C H32C 119.7 . . ?
C31C C32C H32C 119.7 . . ?
N1C C1C C2C 105.3(9) . . ?
N1C C1C C20C 126.6(10) . . ?
C2C C1C C20C 126.9(13) . . ?
C3C C2C C1C 109.7(10) . . ?
C3C C2C H2C 125.2 . . ?
C1C C2C H2C 125.2 . . ?
C2C C3C C4C 108.0(9) . . ?
C2C C3C H3C 126.0 . . ?
C4C C3C H3C 126.0 . . ?
N1C C4C C5C 130.5(11) . . ?
N1C C4C C3C 105.5(9) . . ?
C5C C4C C3C 123.9(11) . . ?
C1C N1C C4C 111.5(10) . . ?
C1C N1C H1C 124.2 . . ?
C4C N1C H1C 124.2 . . ?
C16C C15C C14C 114.2(8) . . ?
C16C C15C C33C 118.6(8) . . ?
C14C C15C C33C 126.7(9) . . ?
N4C C16C C15C 128.9(10) . . ?
N4C C16C C17C 111.5(8) . . ?
C15C C16C C17C 119.4(9) . . ?
N5C C17C C18C 130.7(10) . . ?
N5C C17C C16C 123.0(9) . . ?
C18C C17C C16C 106.3(8) . . ?
N6C C18C C17C 128.6(9) . . ?
N6C C18C C19C 127.2(8) . . ?
C17C C18C C19C 104.1(8) . . ?
N4C C19C C20C 129.7(9) . . ?
N4C C19C C18C 112.5(7) . . ?
C20C C19C C18C 117.1(9) . . ?
C19C C20C C1C 122.2(9) . . ?
C19C C20C C39C 116.0(8) . . ?
C1C C20C C39C 121.8(8) . . ?
C19C N4C C16C 105.3(8) . . ?
C34C C33C C38C 115.5(7) . . ?
C34C C33C C15C 125.5(8) . . ?
C38C C33C C15C 119.0(7) . . ?
C35C C34C C33C 122.3(8) . . ?
C35C C34C H34C 118.9 . . ?
C33C C34C H34C 118.9 . . ?
C34C C35C C36C 119.8(7) . . ?
C34C C35C H35C 120.1 . . ?
C36C C35C H35C 120.1 . . ?
C37C C36C C35C 121.2(8) . . ?
C37C C36C H36C 119.4 . . ?
C35C C36C H36C 119.4 . . ?
C36C C37C C38C 119.2(8) . . ?
C36C C37C H37C 120.4 . . ?
C38C C37C H37C 120.4 . . ?
C37C C38C C33C 122.0(7) . . ?
C37C C38C N5C 116.5(8) . . ?
C33C C38C N5C 121.5(8) . . ?
O1C N5C C17C 119.8(8) . . ?
O1C N5C C38C 122.3(8) . . ?
C17C N5C C38C 117.9(10) . . ?
C18C N6C C40C 116.3(8) . . ?
C44C C39C C40C 117.2(7) . . ?
C44C C39C C20C 123.3(6) . . ?
C40C C39C C20C 119.2(6) . . ?
N6C C40C C41C 116.8(8) . . ?
N6C C40C C39C 122.8(8) . . ?
C41C C40C C39C 120.4(7) . . ?
C42C C41C C40C 120.3(7) . . ?
C42C C41C H41C 119.9 . . ?
C40C C41C H41C 119.9 . . ?
C41C C42C C43C 121.2(7) . . ?
C41C C42C H42C 119.4 . . ?
C43C C42C H42C 119.4 . . ?
C44C C43C C42C 119.2(7) . . ?
C44C C43C H43C 120.4 . . ?
C42C C43C H43C 120.4 . . ?
C43C C44C C39C 121.0(7) . . ?
C43C C44C H44C 119.5 . . ?
C39C C44C H44C 119.5 . . ?
N1D C1D C2D 107.8(10) . . ?
N1D C1D C20D 122.1(13) . . ?
C2D C1D C20D 130.0(14) . . ?
C3D C2D C1D 108.6(11) . . ?
C3D C2D H2D 125.7 . . ?
C1D C2D H2D 125.7 . . ?
C2D C3D C4D 107.4(10) . . ?
C2D C3D H3D 126.3 . . ?
C4D C3D H3D 126.3 . . ?
N1D C4D C5C 119.3(12) . . ?
N1D C4D C3D 106.7(10) . . ?
C5C C4D C3D 133.9(12) . . ?
C1D N1D C4D 109.4(11) . . ?
C1D N1D H1D 125.3 . . ?
C4D N1D H1D 125.3 . . ?
C16D C15D C14C 129.0(10) . . ?
C16D C15D C33D 112.7(8) . . ?
C14C C15D C33D 118.2(9) . . ?
N4D C16D C15D 129.0(11) . . ?
N4D C16D C17D 110.1(9) . . ?
C15D C16D C17D 120.4(10) . . ?
N5D C17D C18D 128.3(12) . . ?
N5D C17D C16D 125.8(11) . . ?
C18D C17D C16D 105.7(9) . . ?
N6D C18D C17D 131.4(10) . . ?
N6D C18D C19D 122.5(9) . . ?
C17D C18D C19D 105.8(8) . . ?
N4D C19D C20D 130.0(10) . . ?
N4D C19D C18D 109.5(8) . . ?
C20D C19D C18D 120.5(10) . . ?
C19D C20D C1D 123.2(11) . . ?
C19D C20D C39D 116.4(9) . . ?
C1D C20D C39D 119.7(10) . . ?
C16D N4D C19D 108.4(10) . . ?
C34D C33D C38D 114.0(8) . . ?
C34D C33D C15D 123.6(9) . . ?
C38D C33D C15D 122.2(8) . . ?
C35D C34D C33D 123.9(9) . . ?
C35D C34D H34D 118.0 . . ?
C33D C34D H34D 118.0 . . ?
C34D C35D C36D 120.5(8) . . ?
C34D C35D H35D 119.8 . . ?
C36D C35D H35D 119.8 . . ?
C37D C36D C35D 118.5(9) . . ?
C37D C36D H36D 120.8 . . ?
C35D C36D H36D 120.8 . . ?
C36D C37D C38D 121.3(10) . . ?
C36D C37D H37D 119.4 . . ?
C38D C37D H37D 119.4 . . ?
N5D C38D C37D 117.3(9) . . ?
N5D C38D C33D 121.1(10) . . ?
C37D C38D C33D 121.6(8) . . ?
C17D N5D C38D 116.7(12) . . ?
O1D N6D C18D 123.1(8) . . ?
O1D N6D C40D 118.5(9) . . ?
C18D N6D C40D 118.3(9) . . ?
C44D C39D C40D 117.1(7) . . ?
C44D C39D C20D 123.0(7) . . ?
C40D C39D C20D 119.9(7) . . ?
C41D C40D N6D 116.9(8) . . ?
C41D C40D C39D 121.8(7) . . ?
N6D C40D C39D 121.3(8) . . ?
C42D C41D C40D 119.1(8) . . ?
C42D C41D H41D 120.4 . . ?
C40D C41D H41D 120.4 . . ?
C41D C42D C43D 120.6(7) . . ?
C41D C42D H42D 119.7 . . ?
C43D C42D H42D 119.7 . . ?
C44D C43D C42D 119.8(7) . . ?
C44D C43D H43D 120.1 . . ?
C42D C43D H43D 120.1 . . ?
C43D C44D C39D 121.3(7) . . ?
C43D C44D H44D 119.3 . . ?
C39D C44D H44D 119.3 . . ?
C1A N1A C4A 109.7(2) . . ?
C1A N1A H1A 125.2 . . ?
C4A N1A H1A 125.2 . . ?
C6A N2A C9A 105.6(2) . . ?
C14A N3A C11A 109.6(2) . . ?
C14A N3A H3A1 125.2 . . ?
C11A N3A H3A1 125.2 . . ?
C19A N4A C16A 107.0(2) . . ?
O1A N5A C17A 129.9(5) . . ?
O1A N5A C38A 114.2(5) . . ?
C17A N5A C38A 115.8(2) . . ?
O1B N6A C18A 124.3(2) . . ?
O1B N6A C40A 117.8(2) . . ?
C18A N6A C40A 117.8(2) . . ?
C9C N2C C6C 104.9(2) . . ?
C14C N3C C11C 110.4(2) . . ?
C14C N3C H3C1 124.8 . . ?
C11C N3C H3C1 124.8 . . ?
 
loop_
 _geom_torsion_atom_site_label_1
 _geom_torsion_atom_site_label_2
 _geom_torsion_atom_site_label_3
 _geom_torsion_atom_site_label_4
 _geom_torsion
 _geom_torsion_site_symmetry_1
 _geom_torsion_site_symmetry_2
 _geom_torsion_site_symmetry_3
 _geom_torsion_site_symmetry_4
 _geom_torsion_publ_flag
N1A C1A C2A C3A -0.6(3) . . . . ?
C20A C1A C2A C3A -172.1(3) . . . . ?
C1A C2A C3A C4A 0.2(3) . . . . ?
C2A C3A C4A N1A 0.3(3) . . . . ?
C2A C3A C4A C5A 178.6(3) . . . . ?
N1A C4A C5A C6A 6.0(5) . . . . ?
C3A C4A C5A C6A -171.8(3) . . . . ?
N1A C4A C5A C21A -173.9(3) . . . . ?
C3A C4A C5A C21A 8.2(4) . . . . ?
C4A C5A C6A N2A 6.0(5) . . . . ?
C21A C5A C6A N2A -174.0(3) . . . . ?
C4A C5A C6A C7A -172.6(3) . . . . ?
C21A C5A C6A C7A 7.4(5) . . . . ?
N2A C6A C7A C8A -0.4(4) . . . . ?
C5A C6A C7A C8A 178.4(3) . . . . ?
C6A C7A C8A C9A 0.6(4) . . . . ?
C7A C8A C9A N2A -0.5(4) . . . . ?
C7A C8A C9A C10A 176.4(3) . . . . ?
N2A C9A C10A C11A 7.9(5) . . . . ?
C8A C9A C10A C11A -168.5(3) . . . . ?
N2A C9A C10A C27A -174.1(3) . . . . ?
C8A C9A C10A C27A 9.5(4) . . . . ?
C9A C10A C11A N3A 1.0(5) . . . . ?
C27A C10A C11A N3A -177.0(2) . . . . ?
C9A C10A C11A C12A 178.1(3) . . . . ?
C27A C10A C11A C12A 0.1(4) . . . . ?
N3A C11A C12A C13A 2.3(3) . . . . ?
C10A C11A C12A C13A -175.3(3) . . . . ?
C11A C12A C13A C14A -1.0(3) . . . . ?
C12A C13A C14A N3A -0.6(3) . . . . ?
C12A C13A C14A C15A -176.5(3) . . . . ?
N3A C14A C15A C16A -22.0(4) . . . . ?
C13A C14A C15A C16A 153.3(3) . . . . ?
N3A C14A C15A C33A 154.5(2) . . . . ?
C13A C14A C15A C33A -30.2(4) . . . . ?
C14A C15A C16A N4A 9.6(4) . . . . ?
C33A C15A C16A N4A -167.1(2) . . . . ?
C14A C15A C16A C17A -171.0(2) . . . . ?
C33A C15A C16A C17A 12.2(3) . . . . ?
N4A C16A C17A N5A 174.4(2) . . . . ?
C15A C16A C17A N5A -5.0(4) . . . . ?
N4A C16A C17A C18A -1.4(3) . . . . ?
C15A C16A C17A C18A 179.1(2) . . . . ?
N5A C17A C18A N6A 1.3(5) . . . . ?
C16A C17A C18A N6A 176.9(3) . . . . ?
N5A C17A C18A C19A -172.7(3) . . . . ?
C16A C17A C18A C19A 2.9(3) . . . . ?
N6A C18A C19A N4A -178.1(2) . . . . ?
C17A C18A C19A N4A -3.6(3) . . . . ?
N6A C18A C19A C20A -5.7(4) . . . . ?
C17A C18A C19A C20A 168.8(2) . . . . ?
N4A C19A C20A C1A 14.4(4) . . . . ?
C18A C19A C20A C1A -156.6(3) . . . . ?
N4A C19A C20A C39A -176.3(3) . . . . ?
C18A C19A C20A C39A 12.8(4) . . . . ?
N1A C1A C20A C19A -21.6(4) . . . . ?
C2A C1A C20A C19A 148.5(3) . . . . ?
N1A C1A C20A C39A 169.6(3) . . . . ?
C2A C1A C20A C39A -20.3(5) . . . . ?
C4A C5A C21A C26A -124.3(3) . . . . ?
C6A C5A C21A C26A 55.7(4) . . . . ?
C4A C5A C21A C22A 56.2(4) . . . . ?
C6A C5A C21A C22A -123.8(3) . . . . ?
C26A C21A C22A C23A -0.2(4) . . . . ?
C5A C21A C22A C23A 179.3(2) . . . . ?
C21A C22A C23A C24A 0.8(4) . . . . ?
C22A C23A C24A C25A -0.9(4) . . . . ?
C23A C24A C25A C26A 0.4(4) . . . . ?
C22A C21A C26A C25A -0.4(4) . . . . ?
C5A C21A C26A C25A -179.9(2) . . . . ?
C24A C25A C26A C21A 0.3(4) . . . . ?
C11A C10A C27A C32A 62.4(4) . . . . ?
C9A C10A C27A C32A -115.8(3) . . . . ?
C11A C10A C27A C28A -119.0(3) . . . . ?
C9A C10A C27A C28A 62.8(3) . . . . ?
C32A C27A C28A C29A -0.7(4) . . . . ?
C10A C27A C28A C29A -179.3(3) . . . . ?
C27A C28A C29A C30A 0.9(4) . . . . ?
C28A C29A C30A C31A -0.7(5) . . . . ?
C29A C30A C31A C32A 0.3(5) . . . . ?
C28A C27A C32A C31A 0.2(4) . . . . ?
C10A C27A C32A C31A 178.8(3) . . . . ?
C30A C31A C32A C27A 0.0(4) . . . . ?
C16A C15A C33A C38A -11.6(3) . . . . ?
C14A C15A C33A C38A 171.6(2) . . . . ?
C16A C15A C33A C34A 161.6(2) . . . . ?
C14A C15A C33A C34A -15.2(4) . . . . ?
C38A C33A C34A C35A -3.2(4) . . . . ?
C15A C33A C34A C35A -176.6(2) . . . . ?
C33A C34A C35A C36A -1.4(4) . . . . ?
C34A C35A C36A C37A 3.6(4) . . . . ?
C35A C36A C37A C38A -1.0(4) . . . . ?
C36A C37A C38A N5A 172.3(2) . . . . ?
C36A C37A C38A C33A -3.8(4) . . . . ?
C34A C33A C38A N5A -170.1(2) . . . . ?
C15A C33A C38A N5A 3.5(4) . . . . ?
C34A C33A C38A C37A 5.7(4) . . . . ?
C15A C33A C38A C37A 179.3(2) . . . . ?
C19A C20A C39A C44A 166.6(3) . . . . ?
C1A C20A C39A C44A -23.9(4) . . . . ?
C19A C20A C39A C40A -11.4(4) . . . . ?
C1A C20A C39A C40A 158.1(3) . . . . ?
C44A C39A C40A C41A 5.5(4) . . . . ?
C20A C39A C40A C41A -176.3(3) . . . . ?
C44A C39A C40A N6A -175.6(2) . . . . ?
C20A C39A C40A N6A 2.5(4) . . . . ?
N6A C40A C41A C42A 179.7(3) . . . . ?
C39A C40A C41A C42A -1.5(4) . . . . ?
C40A C41A C42A C43A -2.7(5) . . . . ?
C41A C42A C43A C44A 2.5(5) . . . . ?
C42A C43A C44A C39A 1.9(5) . . . . ?
C40A C39A C44A C43A -5.7(4) . . . . ?
C20A C39A C44A C43A 176.2(3) . . . . ?
C4D C5C C6C N2C -11.8(13) . . . . ?
C4C C5C C6C N2C -6.4(10) . . . . ?
C21C C5C C6C N2C 170.4(2) . . . . ?
C4D C5C C6C C7C 167.9(12) . . . . ?
C4C C5C C6C C7C 173.2(9) . . . . ?
C21C C5C C6C C7C -10.0(4) . . . . ?
N2C C6C C7C C8C 0.4(3) . . . . ?
C5C C6C C7C C8C -179.3(2) . . . . ?
C6C C7C C8C C9C -0.8(3) . . . . ?
C7C C8C C9C N2C 1.0(3) . . . . ?
C7C C8C C9C C10C -174.5(2) . . . . ?
N2C C9C C10C C11C 0.0(4) . . . . ?
C8C C9C C10C C11C 174.9(2) . . . . ?
N2C C9C C10C C27C -177.1(2) . . . . ?
C8C C9C C10C C27C -2.2(4) . . . . ?
C9C C10C C11C N3C -6.2(4) . . . . ?
C27C C10C C11C N3C 170.9(2) . . . . ?
C9C C10C C11C C12C 172.2(3) . . . . ?
C27C C10C C11C C12C -10.7(4) . . . . ?
N3C C11C C12C C13C -0.8(3) . . . . ?
C10C C11C C12C C13C -179.5(2) . . . . ?
C11C C12C C13C C14C -0.7(3) . . . . ?
C12C C13C C14C N3C 1.9(3) . . . . ?
C12C C13C C14C C15C -176.2(12) . . . . ?
C12C C13C C14C C15D 170.1(14) . . . . ?
C4D C5C C21C C22C -58.0(10) . . . . ?
C4C C5C C21C C22C -62.9(10) . . . . ?
C6C C5C C21C C22C 120.4(3) . . . . ?
C4D C5C C21C C26C 120.4(10) . . . . ?
C4C C5C C21C C26C 115.4(10) . . . . ?
C6C C5C C21C C26C -61.3(3) . . . . ?
C26C C21C C22C C23C -0.2(4) . . . . ?
C5C C21C C22C C23C 178.1(3) . . . . ?
C21C C22C C23C C24C -0.5(4) . . . . ?
C22C C23C C24C C25C 0.1(4) . . . . ?
C23C C24C C25C C26C 1.1(4) . . . . ?
C24C C25C C26C C21C -1.9(4) . . . . ?
C22C C21C C26C C25C 1.4(4) . . . . ?
C5C C21C C26C C25C -176.9(2) . . . . ?
C11C C10C C27C C32C -67.7(3) . . . . ?
C9C C10C C27C C32C 109.7(3) . . . . ?
C11C C10C C27C C28C 114.2(3) . . . . ?
C9C C10C C27C C28C -68.4(3) . . . . ?
C32C C27C C28C C29C 1.6(4) . . . . ?
C10C C27C C28C C29C 179.7(2) . . . . ?
C27C C28C C29C C30C -2.0(4) . . . . ?
C28C C29C C30C C31C 0.8(4) . . . . ?
C29C C30C C31C C32C 0.7(4) . . . . ?
C28C C27C C32C C31C -0.2(4) . . . . ?
C10C C27C C32C C31C -178.3(2) . . . . ?
C30C C31C C32C C27C -1.0(4) . . . . ?
N1C C1C C2C C3C 2(3) . . . . ?
C20C C1C C2C C3C 170(3) . . . . ?
C1C C2C C3C C4C -1(4) . . . . ?
C4D C5C C4C N1C 155(9) . . . . ?
C6C C5C C4C N1C -8(3) . . . . ?
C21C C5C C4C N1C 176(2) . . . . ?
C4D C5C C4C C3C -20(6) . . . . ?
C6C C5C C4C C3C 178(2) . . . . ?
C21C C5C C4C C3C 1(3) . . . . ?
C2C C3C C4C N1C 0(3) . . . . ?
C2C C3C C4C C5C 175(2) . . . . ?
C2C C1C N1C C4C -2(3) . . . . ?
C20C C1C N1C C4C -170(2) . . . . ?
C5C C4C N1C C1C -174(2) . . . . ?
C3C C4C N1C C1C 1(3) . . . . ?
N3C C14C C15C C16C 23(2) . . . . ?
C13C C14C C15C C16C -159.0(12) . . . . ?
C15D C14C C15C C16C -15(6) . . . . ?
N3C C14C C15C C33C -165.2(15) . . . . ?
C13C C14C C15C C33C 12(3) . . . . ?
C15D C14C C15C C33C 156(10) . . . . ?
C14C C15C C16C N4C -11(3) . . . . ?
C33C C15C C16C N4C 176.9(17) . . . . ?
C14C C15C C16C C17C 164.0(18) . . . . ?
C33C C15C C16C C17C -8(3) . . . . ?
N4C C16C C17C N5C -180(2) . . . . ?
C15C C16C C17C N5C 4(3) . . . . ?
N4C C16C C17C C18C 1(2) . . . . ?
C15C C16C C17C C18C -174.5(18) . . . . ?
N5C C17C C18C N6C -1(4) . . . . ?
C16C C17C C18C N6C 177.9(13) . . . . ?
N5C C17C C18C C19C -177(3) . . . . ?
C16C C17C C18C C19C 2(2) . . . . ?
N6C C18C C19C N4C 179.3(14) . . . . ?
C17C C18C C19C N4C -5(2) . . . . ?
N6C C18C C19C C20C 8(3) . . . . ?
C17C C18C C19C C20C -176.1(18) . . . . ?
N4C C19C C20C C1C -5(3) . . . . ?
C18C C19C C20C C1C 164.7(17) . . . . ?
N4C C19C C20C C39C 176.5(18) . . . . ?
C18C C19C C20C C39C -14(2) . . . . ?
N1C C1C C20C C19C 15(4) . . . . ?
C2C C1C C20C C19C -150(2) . . . . ?
N1C C1C C20C C39C -166(2) . . . . ?
C2C C1C C20C C39C 28(3) . . . . ?
C20C C19C N4C C16C 175.5(19) . . . . ?
C18C C19C N4C C16C 5(2) . . . . ?
C15C C16C N4C C19C 171(2) . . . . ?
C17C C16C N4C C19C -4(2) . . . . ?
C16C C15C C33C C34C -174.0(17) . . . . ?
C14C C15C C33C C34C 15(3) . . . . ?
C16C C15C C33C C38C 5(3) . . . . ?
C14C C15C C33C C38C -165.7(17) . . . . ?
C38C C33C C34C C35C -1(2) . . . . ?
C15C C33C C34C C35C 178.6(18) . . . . ?
C33C C34C C35C C36C 0(2) . . . . ?
C34C C35C C36C C37C -1(2) . . . . ?
C35C C36C C37C C38C 2(2) . . . . ?
C36C C37C C38C C33C -3(2) . . . . ?
C36C C37C C38C N5C 178.4(15) . . . . ?
C34C C33C C38C C37C 2(2) . . . . ?
C15C C33C C38C C37C -177.3(17) . . . . ?
C34C C33C C38C N5C -179.1(15) . . . . ?
C15C C33C C38C N5C 1(2) . . . . ?
C18C C17C N5C O1C 1(4) . . . . ?
C16C C17C N5C O1C -178.1(17) . . . . ?
C18C C17C N5C C38C -179(2) . . . . ?
C16C C17C N5C C38C 2(3) . . . . ?
C37C C38C N5C O1C -6(2) . . . . ?
C33C C38C N5C O1C 175.3(12) . . . . ?
C37C C38C N5C C17C 173.5(18) . . . . ?
C33C C38C N5C C17C -5(3) . . . . ?
C17C C18C N6C C40C -174.9(18) . . . . ?
C19C C18C N6C C40C 0(2) . . . . ?
C19C C20C C39C C44C -160.8(15) . . . . ?
C1C C20C C39C C44C 21(2) . . . . ?
C19C C20C C39C C40C 13.4(18) . . . . ?
C1C C20C C39C C40C -165.1(15) . . . . ?
C18C N6C C40C C41C 177.0(10) . . . . ?
C18C N6C C40C C39C -0.9(16) . . . . ?
C44C C39C C40C N6C 168.6(11) . . . . ?
C20C C39C C40C N6C -6.0(16) . . . . ?
C44C C39C C40C C41C -9.2(16) . . . . ?
C20C C39C C40C C41C 176.2(10) . . . . ?
N6C C40C C41C C42C -173.6(9) . . . . ?
C39C C40C C41C C42C 4.4(15) . . . . ?
C40C C41C C42C C43C 3.2(13) . . . . ?
C41C C42C C43C C44C -5.5(13) . . . . ?
C42C C43C C44C C39C 0.2(16) . . . . ?
C40C C39C C44C C43C 6.9(18) . . . . ?
C20C C39C C44C C43C -178.7(10) . . . . ?
N1D C1D C2D C3D 0(4) . . . . ?
C20D C1D C2D C3D 178(3) . . . . ?
C1D C2D C3D C4D 2(4) . . . . ?
C4C C5C C4D N1D -22(6) . . . . ?
C6C C5C C4D N1D -1(3) . . . . ?
C21C C5C C4D N1D 177(2) . . . . ?
C4C C5C C4D C3D 154(9) . . . . ?
C6C C5C C4D C3D 174(3) . . . . ?
C21C C5C C4D C3D -8(3) . . . . ?
C2D C3D C4D N1D -2(4) . . . . ?
C2D C3D C4D C5C -178(2) . . . . ?
C2D C1D N1D C4D -2(4) . . . . ?
C20D C1D N1D C4D -180(2) . . . . ?
C5C C4D N1D C1D 179(2) . . . . ?
C3D C4D N1D C1D 3(4) . . . . ?
N3C C14C C15D C16D 12(3) . . . . ?
C13C C14C C15D C16D -155.0(17) . . . . ?
C15C C14C C15D C16D 160(10) . . . . ?
N3C C14C C15D C33D -167.5(16) . . . . ?
C13C C14C C15D C33D 25(3) . . . . ?
C15C C14C C15D C33D -20(6) . . . . ?
C14C C15D C16D N4D -2(4) . . . . ?
C33D C15D C16D N4D 177.9(18) . . . . ?
C14C C15D C16D C17D 169(2) . . . . ?
C33D C15D C16D C17D -11(3) . . . . ?
N4D C16D C17D N5D -179(3) . . . . ?
C15D C16D C17D N5D 9(4) . . . . ?
N4D C16D C17D C18D 5(3) . . . . ?
C15D C16D C17D C18D -167.1(19) . . . . ?
N5D C17D C18D N6D 4(4) . . . . ?
C16D C17D C18D N6D 179.7(15) . . . . ?
N5D C17D C18D C19D 177(3) . . . . ?
C16D C17D C18D C19D -7(2) . . . . ?
N6D C18D C19D N4D -179.4(14) . . . . ?
C17D C18D C19D N4D 7(2) . . . . ?
N6D C18D C19D C20D -1(3) . . . . ?
C17D C18D C19D C20D -175(2) . . . . ?
N4D C19D C20D C1D -20(4) . . . . ?
C18D C19D C20D C1D 162(2) . . . . ?
N4D C19D C20D C39D 169(2) . . . . ?
C18D C19D C20D C39D -9(3) . . . . ?
N1D C1D C20D C19D 30(4) . . . . ?
C2D C1D C20D C19D -147(3) . . . . ?
N1D C1D C20D C39D -159(3) . . . . ?
C2D C1D C20D C39D 23(4) . . . . ?
C15D C16D N4D C19D 170(2) . . . . ?
C17D C16D N4D C19D -1(2) . . . . ?
C20D C19D N4D C16D 178(2) . . . . ?
C18D C19D N4D C16D -3(2) . . . . ?
C16D C15D C33D C34D -167.3(18) . . . . ?
C14C C15D C33D C34D 13(3) . . . . ?
C16D C15D C33D C38D 7(3) . . . . ?
C14C C15D C33D C38D -173.2(16) . . . . ?
C38D C33D C34D C35D 6(2) . . . . ?
C15D C33D C34D C35D -179(2) . . . . ?
C33D C34D C35D C36D -4(3) . . . . ?
C34D C35D C36D C37D 1(3) . . . . ?
C35D C36D C37D C38D 0(3) . . . . ?
C36D C37D C38D N5D -178.5(18) . . . . ?
C36D C37D C38D C33D 3(3) . . . . ?
C34D C33D C38D N5D 175.9(17) . . . . ?
C15D C33D C38D N5D 1(3) . . . . ?
C34D C33D C38D C37D -5(2) . . . . ?
C15D C33D C38D C37D 180(2) . . . . ?
C18D C17D N5D C38D 175(2) . . . . ?
C16D C17D N5D C38D 0(4) . . . . ?
C37D C38D N5D C17D 176(2) . . . . ?
C33D C38D N5D C17D -5(3) . . . . ?
C17D C18D N6D O1D -5(3) . . . . ?
C19D C18D N6D O1D -177.7(15) . . . . ?
C17D C18D N6D C40D 179(2) . . . . ?
C19D C18D N6D C40D 7(2) . . . . ?
C19D C20D C39D C44D -166.5(16) . . . . ?
C1D C20D C39D C44D 22(2) . . . . ?
C19D C20D C39D C40D 12(2) . . . . ?
C1D C20D C39D C40D -158.8(17) . . . . ?
O1D N6D C40D C41D -1.0(17) . . . . ?
C18D N6D C40D C41D 174.5(11) . . . . ?
O1D N6D C40D C39D -178.9(11) . . . . ?
C18D N6D C40D C39D -3.4(18) . . . . ?
C44D C39D C40D C41D -5.3(18) . . . . ?
C20D C39D C40D C41D 175.8(11) . . . . ?
C44D C39D C40D N6D 172.5(13) . . . . ?
C20D C39D C40D N6D -6.4(18) . . . . ?
N6D C40D C41D C42D -174.4(11) . . . . ?
C39D C40D C41D C42D 3.5(17) . . . . ?
C40D C41D C42D C43D 0.9(15) . . . . ?
C41D C42D C43D C44D -3.2(15) . . . . ?
C42D C43D C44D C39D 1.3(19) . . . . ?
C40D C39D C44D C43D 3(2) . . . . ?
C20D C39D C44D C43D -178.3(12) . . . . ?
C20A C1A N1A C4A 172.6(3) . . . . ?
C2A C1A N1A C4A 0.9(3) . . . . ?
C5A C4A N1A C1A -179.0(3) . . . . ?
C3A C4A N1A C1A -0.8(3) . . . . ?
C5A C6A N2A C9A -178.7(3) . . . . ?
C7A C6A N2A C9A 0.1(3) . . . . ?
C10A C9A N2A C6A -176.6(3) . . . . ?
C8A C9A N2A C6A 0.3(3) . . . . ?
C13A C14A N3A C11A 2.1(3) . . . . ?
C15A C14A N3A C11A 178.3(2) . . . . ?
C10A C11A N3A C14A 174.9(3) . . . . ?
C12A C11A N3A C14A -2.7(3) . . . . ?
C20A C19A N4A C16A -168.8(3) . . . . ?
C18A C19A N4A C16A 2.8(3) . . . . ?
C15A C16A N4A C19A 178.6(3) . . . . ?
C17A C16A N4A C19A -0.8(3) . . . . ?
C18A C17A N5A O1A -12.0(7) . . . . ?
C16A C17A N5A O1A 173.2(6) . . . . ?
C18A C17A N5A C38A 171.0(2) . . . . ?
C16A C17A N5A C38A -3.8(4) . . . . ?
C37A C38A N5A O1A 10.9(5) . . . . ?
C33A C38A N5A O1A -173.1(5) . . . . ?
C37A C38A N5A C17A -171.7(2) . . . . ?
C33A C38A N5A C17A 4.4(4) . . . . ?
C17A C18A N6A O1B 5.2(4) . . . . ?
C19A C18A N6A O1B 178.2(3) . . . . ?
C17A C18A N6A C40A -176.8(3) . . . . ?
C19A C18A N6A C40A -3.8(4) . . . . ?
C41A C40A N6A O1B 2.2(4) . . . . ?
C39A C40A N6A O1B -176.6(3) . . . . ?
C41A C40A N6A C18A -175.9(2) . . . . ?
C39A C40A N6A C18A 5.3(4) . . . . ?
C10C C9C N2C C6C 174.7(2) . . . . ?
C8C C9C N2C C6C -0.7(3) . . . . ?
C5C C6C N2C C9C 179.9(2) . . . . ?
C7C C6C N2C C9C 0.2(3) . . . . ?
C13C C14C N3C C11C -2.5(3) . . . . ?
C15C C14C N3C C11C 175.6(12) . . . . ?
C15D C14C N3C C11C -173.4(12) . . . . ?
C10C C11C N3C C14C -179.3(2) . . . . ?
C12C C11C N3C C14C 2.0(3) . . . . ?
 
_refine_diff_density_max    0.329
_refine_diff_density_min   -0.251
_refine_diff_density_rms    0.052

_shelxl_version_number 2013-4

 
data_12mz111_0m 
  
_audit_creation_method            SHELXL-97 
_chemical_name_systematic 
; 
 ? 
; 
_chemical_name_common             ? 
_chemical_melting_point           ? 
_chemical_formula_moiety          
 '2(C44 H25 N5 Ni O2), 0.2935(C5 H12), 0.2065(C H2 Cl2)' 
_chemical_formula_sum 
 'C89.674 H53.935 Cl0.413 N10 Ni2 O4' 
_chemical_formula_weight          1467.47 
  
loop_ 
 _atom_type_symbol 
 _atom_type_description 
 _atom_type_scat_dispersion_real 
 _atom_type_scat_dispersion_imag 
 _atom_type_scat_source 
 'C'  'C'   0.0033   0.0016 
 'International Tables Vol C Tables 4.2.6.8 and 6.1.1.4' 
 'H'  'H'   0.0000   0.0000 
 'International Tables Vol C Tables 4.2.6.8 and 6.1.1.4' 
 'N'  'N'   0.0061   0.0033 
 'International Tables Vol C Tables 4.2.6.8 and 6.1.1.4' 
 'O'  'O'   0.0106   0.0060 
 'International Tables Vol C Tables 4.2.6.8 and 6.1.1.4' 
 'Ni'  'Ni'   0.3393   1.1124 
 'International Tables Vol C Tables 4.2.6.8 and 6.1.1.4' 
 'Cl'  'Cl'   0.1484   0.1585 
 'International Tables Vol C Tables 4.2.6.8 and 6.1.1.4' 
  
_symmetry_cell_setting            Monoclinic 
_symmetry_space_group_name_H-M    C2/c 
  
loop_ 
 _symmetry_equiv_pos_as_xyz 
 'x, y, z' 
 '-x, y, -z+1/2' 
 'x+1/2, y+1/2, z' 
 '-x+1/2, y+1/2, -z+1/2' 
 '-x, -y, -z' 
 'x, -y, z-1/2' 
 '-x+1/2, -y+1/2, -z' 
 'x+1/2, -y+1/2, z-1/2' 
  
_cell_length_a                    30.029(18) 
_cell_length_b                    14.388(9) 
_cell_length_c                    32.622(19) 
_cell_angle_alpha                 90.00 
_cell_angle_beta                  111.519(9) 
_cell_angle_gamma                 90.00 
_cell_volume                      13112(14) 
_cell_formula_units_Z             8 
_cell_measurement_temperature     100(2) 
_cell_measurement_reflns_used     517 
_cell_measurement_theta_min       2.70 
_cell_measurement_theta_max       28.31 
  
_exptl_crystal_description        needle 
_exptl_crystal_colour             red 
_exptl_crystal_size_max           0.26 
_exptl_crystal_size_mid           0.04 
_exptl_crystal_size_min           0.04 
_exptl_crystal_density_meas       ? 
_exptl_crystal_density_diffrn     1.487 
_exptl_crystal_density_method     'not measured' 
_exptl_crystal_F_000              6056 
_exptl_absorpt_coefficient_mu     0.660 
_exptl_absorpt_correction_type    'multi-scan'
_exptl_absorpt_correction_T_min   0.5945  
_exptl_absorpt_correction_T_max   0.7457 
_exptl_absorpt_process_details    'Apex2  v2011.2-0 (Bruker, 2011)'
  
_exptl_special_details 
; 
A site occupied by solvate molecules was refined as disordered between methylene 
chloride and pentane. Pentane C-C bonds were restrained to be 1.45(2) Angstroms, 
1,3-C...C distances to be 2.5(2) Angstroms or larger. ADPs within the pentane and 
dichloromethane molecules were restrained to be each similar (SIMU and DELU commands 
in Shexltl, su of 0.001 each). 
Two reflections, 0 0 2 and 1 1 0, were partially obstructed by the beam stop and 
were omitted from the refinement. 
; 
  
_diffrn_ambient_temperature       100(2) 
_diffrn_radiation_wavelength      0.71073 
_diffrn_radiation_type            MoK\a 
_diffrn_radiation_source          'fine-focus sealed tube' 
_diffrn_radiation_monochromator   graphite 
_diffrn_measurement_device_type   'Bruker AXS SMART APEX CCD diffractometer'  
_diffrn_measurement_method        '\w scans' 
_diffrn_detector_area_resol_mean  ? 
_diffrn_standards_number          0 
_diffrn_standards_interval_count  . 
_diffrn_standards_interval_time   . 
_diffrn_standards_decay_%         ?
_diffrn_reflns_number             45748 
_diffrn_reflns_av_R_equivalents   0.1282 
_diffrn_reflns_av_sigmaI/netI     0.1994 
_diffrn_reflns_limit_h_min        -39 
_diffrn_reflns_limit_h_max        30 
_diffrn_reflns_limit_k_min        -17 
_diffrn_reflns_limit_k_max        19 
_diffrn_reflns_limit_l_min        -43 
_diffrn_reflns_limit_l_max        43 
_diffrn_reflns_theta_min          1.58 
_diffrn_reflns_theta_max          28.33 
_reflns_number_total              15855 
_reflns_number_gt                 7111 
_reflns_threshold_expression      I>2\s(I) 
  
_computing_data_collection        'Apex2 v2011.2-0 (Bruker, 2011)' 
_computing_cell_refinement        'Apex2 v2011.2-0' 
_computing_data_reduction         'Apex2 v2011.2-0'
_computing_structure_solution     
'SHELXTL 6.14 (Bruker, 2003; Sheldrick, 2008)'  
_computing_structure_refinement   
;  
SHELXLE Rev548, Shelxle (H\"ubschle et al., 2011)
; 
_computing_molecular_graphics     'SHELXTL 6.14' 
_computing_publication_material   'SHELXTL 6.14' 
  
_refine_special_details 
; 
 Refinement of F^2^ against ALL reflections.  The weighted R-factor wR and 
 goodness of fit S are based on F^2^, conventional R-factors R are based 
 on F, with F set to zero for negative F^2^. The threshold expression of 
 F^2^ > 2sigma(F^2^) is used only for calculating R-factors(gt) etc. and is 
 not relevant to the choice of reflections for refinement.  R-factors based 
 on F^2^ are statistically about twice as large as those based on F, and R- 
 factors based on ALL data will be even larger. 
; 
  
_refine_ls_structure_factor_coef  Fsqd 
_refine_ls_matrix_type            full 
_refine_ls_weighting_scheme       calc 
_refine_ls_weighting_details 
 'calc w=1/[\s^2^(Fo^2^)+(0.0480P)^2^+0.0000P] where P=(Fo^2^+2Fc^2^)/3' 
_atom_sites_solution_primary      direct 
_atom_sites_solution_secondary    difmap 
_atom_sites_solution_hydrogens    geom 
_refine_ls_hydrogen_treatment     constr
_refine_ls_extinction_method      none 
_refine_ls_extinction_coef        ? 
_refine_ls_number_reflns          15855 
_refine_ls_number_parameters      975 
_refine_ls_number_restraints      26 
_refine_ls_R_factor_all           0.1822 
_refine_ls_R_factor_gt            0.0652 
_refine_ls_wR_factor_ref          0.1445 
_refine_ls_wR_factor_gt           0.1148 
_refine_ls_goodness_of_fit_ref    0.950 
_refine_ls_restrained_S_all       0.951 
_refine_ls_shift/su_max           0.001 
_refine_ls_shift/su_mean          0.000 
  
loop_ 
 _atom_site_label 
 _atom_site_type_symbol 
 _atom_site_fract_x 
 _atom_site_fract_y 
 _atom_site_fract_z 
 _atom_site_U_iso_or_equiv 
 _atom_site_adp_type 
 _atom_site_occupancy 
 _atom_site_symmetry_multiplicity 
 _atom_site_calc_flag 
 _atom_site_refinement_flags 
 _atom_site_disorder_assembly 
 _atom_site_disorder_group 
C1 C 0.0000 0.308(2) 0.2500 0.110(3) Uani 0.413(9) 2 d SPU . 1 
H1A H -0.0003 0.3489 0.2742 0.132 Uiso 0.206(4) 1 calc PR . 1 
H1B H 0.0003 0.3489 0.2258 0.132 Uiso 0.206(4) 1 calc PR . 1 
Cl1 Cl -0.05217(17) 0.2532(4) 0.23193(19) 0.107(3) Uani 0.413(9) 1 d PU . 1 
C2 C -0.0409(7) 0.2366(13) 0.2849(8) 0.223(8) Uani 0.587(9) 1 d PDU . 2 
H2A H -0.0713 0.2027 0.2754 0.335 Uiso 0.587(9) 1 calc PR . 2 
H2B H -0.0370 0.2724 0.3115 0.335 Uiso 0.587(9) 1 calc PR . 2 
H2C H -0.0144 0.1923 0.2912 0.335 Uiso 0.587(9) 1 calc PR . 2 
C3 C -0.0407(5) 0.2962(17) 0.2519(10) 0.223(8) Uani 0.587(9) 1 d PDU . 2 
H3A H -0.0636 0.3465 0.2509 0.268 Uiso 0.587(9) 1 calc PR . 2 
H3B H -0.0550 0.2612 0.2239 0.268 Uiso 0.587(9) 1 calc PR . 2 
C4 C 0.0000 0.3398(19) 0.2500 0.223(8) Uani 0.587(9) 2 d SPDU . 2 
H4A H 0.0116 0.3811 0.2760 0.268 Uiso 0.294(4) 1 calc PR . 2 
H4B H -0.0116 0.3811 0.2240 0.268 Uiso 0.294(4) 1 calc PR . 2 
Ni1A Ni 0.284217(19) 0.32535(3) 0.212896(14) 0.02116(14) Uani 1 1 d . . . 
O1A O 0.40181(11) 0.4274(2) 0.37482(8) 0.0368(8) Uani 1 1 d . . . 
O2A O 0.32977(12) 0.4189(2) 0.41740(8) 0.0437(9) Uani 1 1 d . . . 
N1A N 0.31281(12) 0.3501(2) 0.27520(9) 0.0229(8) Uani 1 1 d . . . 
N2A N 0.22125(11) 0.3404(2) 0.21469(9) 0.0211(8) Uani 1 1 d . . . 
N3A N 0.25681(11) 0.3052(2) 0.15026(9) 0.0200(8) Uani 1 1 d . . . 
N4A N 0.34658(12) 0.3092(2) 0.21134(9) 0.0234(8) Uani 1 1 d . . . 
N5A N 0.30365(14) 0.3855(2) 0.38018(10) 0.0318(9) Uani 1 1 d . . . 
C1A C 0.35910(16) 0.3769(3) 0.29872(11) 0.0248(10) Uani 1 1 d . . . 
C2A C 0.36526(17) 0.3977(3) 0.34566(12) 0.0269(10) Uani 1 1 d . . . 
C3A C 0.31919(16) 0.3738(3) 0.34727(11) 0.0245(10) Uani 1 1 d . . . 
C4A C 0.28863(15) 0.3479(3) 0.30398(11) 0.0225(10) Uani 1 1 d . . . 
C5A C 0.24080(16) 0.3338(3) 0.29449(11) 0.0240(10) Uani 1 1 d . . . 
C6A C 0.20786(15) 0.3414(3) 0.25052(11) 0.0240(10) Uani 1 1 d . . . 
C7A C 0.15868(16) 0.3642(3) 0.23808(12) 0.0295(10) Uani 1 1 d . . . 
H7A H 0.1413 0.3691 0.2572 0.035 Uiso 1 1 calc R . . 
C8A C 0.14124(16) 0.3777(3) 0.19414(12) 0.0290(10) Uani 1 1 d . . . 
H8A H 0.1095 0.3958 0.1766 0.035 Uiso 1 1 calc R . . 
C9A C 0.17896(14) 0.3600(3) 0.17892(12) 0.0227(9) Uani 1 1 d . . . 
C10A C 0.17454(14) 0.3566(3) 0.13541(11) 0.0219(9) Uani 1 1 d . . . 
C11A C 0.21127(14) 0.3269(3) 0.12222(11) 0.0207(9) Uani 1 1 d . . . 
C12A C 0.20504(15) 0.3035(3) 0.07804(11) 0.0254(10) Uani 1 1 d . . . 
H12A H 0.1768 0.3122 0.0527 0.030 Uiso 1 1 calc R . . 
C13A C 0.24625(15) 0.2672(3) 0.07891(11) 0.0272(10) Uani 1 1 d . . . 
H13A H 0.2525 0.2437 0.0543 0.033 Uiso 1 1 calc R . . 
C14A C 0.27933(15) 0.2698(3) 0.12338(11) 0.0225(10) Uani 1 1 d . . . 
C15A C 0.32695(15) 0.2474(3) 0.13670(11) 0.0226(10) Uani 1 1 d . . . 
C16A C 0.35943(15) 0.2695(3) 0.17823(11) 0.0220(9) Uani 1 1 d . . . 
C17A C 0.40977(16) 0.2690(3) 0.18988(12) 0.0311(11) Uani 1 1 d . . . 
H17A H 0.4271 0.2429 0.1735 0.037 Uiso 1 1 calc R . . 
C18A C 0.42810(16) 0.3132(3) 0.22910(12) 0.0343(11) Uani 1 1 d . . . 
H18A H 0.4609 0.3265 0.2449 0.041 Uiso 1 1 calc R . . 
C19A C 0.38958(15) 0.3361(3) 0.24234(11) 0.0247(10) Uani 1 1 d . . . 
C20A C 0.39575(15) 0.3766(3) 0.28355(11) 0.0270(10) Uani 1 1 d . . . 
C21A C 0.22518(16) 0.3273(3) 0.33184(11) 0.0258(10) Uani 1 1 d . . . 
C22A C 0.25583(17) 0.3580(3) 0.37375(12) 0.0335(11) Uani 1 1 d . . . 
C23A C 0.24102(18) 0.3613(3) 0.40919(13) 0.0392(12) Uani 1 1 d . . . 
H23A H 0.2619 0.3847 0.4368 0.047 Uiso 1 1 calc R . . 
C24A C 0.19607(19) 0.3305(4) 0.40437(14) 0.0467(14) Uani 1 1 d . . . 
H24A H 0.1853 0.3352 0.4283 0.056 Uiso 1 1 calc R . . 
C25A C 0.16667(19) 0.2929(3) 0.36501(14) 0.0432(13) Uani 1 1 d . . . 
H25A H 0.1362 0.2688 0.3622 0.052 Uiso 1 1 calc R . . 
C26A C 0.18148(17) 0.2904(3) 0.32939(13) 0.0349(12) Uani 1 1 d . . . 
H26A H 0.1612 0.2626 0.3026 0.042 Uiso 1 1 calc R . . 
C27A C 0.12778(15) 0.3784(3) 0.09990(12) 0.0257(10) Uani 1 1 d . . . 
C28A C 0.08871(16) 0.3220(4) 0.09091(13) 0.0404(12) Uani 1 1 d . . . 
H28A H 0.0903 0.2698 0.1092 0.049 Uiso 1 1 calc R . . 
C29A C 0.04685(17) 0.3402(4) 0.05540(14) 0.0480(14) Uani 1 1 d . . . 
H29A H 0.0202 0.2996 0.0490 0.058 Uiso 1 1 calc R . . 
C30A C 0.04384(18) 0.4163(4) 0.02959(14) 0.0446(14) Uani 1 1 d . . . 
H30A H 0.0152 0.4283 0.0051 0.053 Uiso 1 1 calc R . . 
C31A C 0.08194(18) 0.4757(3) 0.03878(13) 0.0390(13) Uani 1 1 d . . . 
H31A H 0.0794 0.5302 0.0216 0.047 Uiso 1 1 calc R . . 
C32A C 0.12417(16) 0.4553(3) 0.07330(12) 0.0307(11) Uani 1 1 d . . . 
H32A H 0.1511 0.4946 0.0788 0.037 Uiso 1 1 calc R . . 
C33A C 0.34544(15) 0.2083(3) 0.10348(12) 0.0294(11) Uani 1 1 d . . . 
C34A C 0.35821(18) 0.2680(4) 0.07639(13) 0.0487(14) Uani 1 1 d . . . 
H34A H 0.3554 0.3333 0.0791 0.058 Uiso 1 1 calc R . . 
C35A C 0.37501(19) 0.2326(5) 0.04540(14) 0.0577(16) Uani 1 1 d . . . 
H35A H 0.3839 0.2738 0.0269 0.069 Uiso 1 1 calc R . . 
C36A C 0.37897(18) 0.1390(5) 0.04124(14) 0.0557(16) Uani 1 1 d . . . 
H36A H 0.3910 0.1149 0.0202 0.067 Uiso 1 1 calc R . . 
C37A C 0.3656(2) 0.0802(4) 0.06731(15) 0.0618(17) Uani 1 1 d . . . 
H37A H 0.3681 0.0151 0.0641 0.074 Uiso 1 1 calc R . . 
C38A C 0.34838(19) 0.1137(4) 0.09853(14) 0.0492(14) Uani 1 1 d . . . 
H38A H 0.3387 0.0719 0.1163 0.059 Uiso 1 1 calc R . . 
C39A C 0.44514(17) 0.4116(3) 0.30860(13) 0.0357(12) Uani 1 1 d . . . 
C40A C 0.4609(2) 0.4914(4) 0.29520(15) 0.0584(16) Uani 1 1 d . . . 
H40A H 0.4388 0.5280 0.2726 0.070 Uiso 1 1 calc R . . 
C41A C 0.5085(2) 0.5201(5) 0.31397(18) 0.077(2) Uani 1 1 d . . . 
H41A H 0.5188 0.5747 0.3036 0.092 Uiso 1 1 calc R . . 
C42A C 0.5400(2) 0.4694(6) 0.3470(2) 0.084(2) Uani 1 1 d . . . 
H42A H 0.5725 0.4882 0.3601 0.101 Uiso 1 1 calc R . . 
C43A C 0.5245(2) 0.3908(5) 0.36150(18) 0.069(2) Uani 1 1 d . . . 
H43A H 0.5465 0.3557 0.3848 0.083 Uiso 1 1 calc R . . 
C44A C 0.47743(18) 0.3616(4) 0.34288(14) 0.0512(14) Uani 1 1 d . . . 
H44A H 0.4673 0.3074 0.3536 0.061 Uiso 1 1 calc R . . 
Ni1B Ni 0.16913(2) 0.64264(4) 0.127191(15) 0.02480(15) Uani 1 1 d . . . 
O1B O 0.10054(13) 0.5495(2) 0.25138(10) 0.0540(10) Uani 1 1 d . . . 
O2B O 0.19201(13) 0.5497(2) 0.32606(9) 0.0546(10) Uani 1 1 d . . . 
N1B N 0.16087(13) 0.6158(2) 0.18101(10) 0.0292(9) Uani 1 1 d . . . 
N2B N 0.23459(12) 0.6015(2) 0.15171(9) 0.0247(8) Uani 1 1 d . . . 
N3B N 0.17662(12) 0.6698(2) 0.07268(9) 0.0232(8) Uani 1 1 d . . . 
N4B N 0.10340(13) 0.6767(2) 0.10165(10) 0.0284(8) Uani 1 1 d . . . 
N5B N 0.20859(17) 0.5753(2) 0.29734(11) 0.0407(11) Uani 1 1 d . . . 
C1B C 0.11881(17) 0.5973(3) 0.18708(13) 0.0303(11) Uani 1 1 d . . . 
C2B C 0.12893(19) 0.5744(3) 0.23466(14) 0.0387(13) Uani 1 1 d . . . 
C3B C 0.17971(19) 0.5899(3) 0.25503(13) 0.0350(12) Uani 1 1 d . . . 
C4B C 0.19815(17) 0.6088(3) 0.22137(12) 0.0296(11) Uani 1 1 d . . . 
C5B C 0.24625(17) 0.6050(3) 0.22959(12) 0.0282(10) Uani 1 1 d . . . 
C6B C 0.26231(16) 0.5867(3) 0.19466(12) 0.0285(11) Uani 1 1 d . . . 
C7B C 0.30496(16) 0.5384(3) 0.19822(12) 0.0291(11) Uani 1 1 d . . . 
H7B H 0.3301 0.5212 0.2248 0.035 Uiso 1 1 calc R . . 
C8B C 0.30329(15) 0.5217(3) 0.15728(12) 0.0277(10) Uani 1 1 d . . . 
H8B H 0.3260 0.4877 0.1493 0.033 Uiso 1 1 calc R . . 
C9B C 0.26089(15) 0.5647(3) 0.12799(12) 0.0246(10) Uani 1 1 d . . . 
C10B C 0.25013(15) 0.5798(3) 0.08362(12) 0.0236(10) Uani 1 1 d . . . 
C11B C 0.21222(15) 0.6390(3) 0.05922(11) 0.0230(9) Uani 1 1 d . . . 
C12B C 0.20804(15) 0.6812(3) 0.01866(11) 0.0255(10) Uani 1 1 d . . . 
H12B H 0.2285 0.6714 0.0027 0.031 Uiso 1 1 calc R . . 
C13B C 0.16957(15) 0.7377(3) 0.00694(12) 0.0273(10) Uani 1 1 d . . . 
H13B H 0.1586 0.7768 -0.0183 0.033 Uiso 1 1 calc R . . 
C14B C 0.14834(15) 0.7279(3) 0.03941(11) 0.0234(10) Uani 1 1 d . . . 
C15B C 0.10351(16) 0.7584(3) 0.03583(12) 0.0271(10) Uani 1 1 d . . . 
C16B C 0.08125(16) 0.7287(3) 0.06384(12) 0.0268(10) Uani 1 1 d . . . 
C17B C 0.03169(17) 0.7325(3) 0.05482(13) 0.0342(11) Uani 1 1 d . . . 
H17B H 0.0088 0.7665 0.0316 0.041 Uiso 1 1 calc R . . 
C18B C 0.02224(16) 0.6793(3) 0.08488(13) 0.0367(11) Uani 1 1 d . . . 
H18B H -0.0083 0.6659 0.0858 0.044 Uiso 1 1 calc R . . 
C19B C 0.06750(16) 0.6472(3) 0.11487(12) 0.0292(10) Uani 1 1 d . . . 
C20B C 0.07394(18) 0.6024(3) 0.15478(14) 0.0336(11) Uani 1 1 d . . . 
C21B C 0.27733(19) 0.6042(3) 0.27585(12) 0.0338(12) Uani 1 1 d . . . 
C22B C 0.2589(2) 0.5920(3) 0.30908(13) 0.0390(13) Uani 1 1 d . . . 
C23B C 0.2866(2) 0.5936(3) 0.35385(14) 0.0485(15) Uani 1 1 d . . . 
H23B H 0.2727 0.5845 0.3754 0.058 Uiso 1 1 calc R . . 
C24B C 0.3348(2) 0.6089(3) 0.36565(15) 0.0487(15) Uani 1 1 d . . . 
H24B H 0.3547 0.6096 0.3960 0.058 Uiso 1 1 calc R . . 
C25B C 0.3547(2) 0.6231(3) 0.33417(14) 0.0480(14) Uani 1 1 d . . . 
H25B H 0.3881 0.6333 0.3430 0.058 Uiso 1 1 calc R . . 
C26B C 0.32652(19) 0.6228(3) 0.29024(13) 0.0405(13) Uani 1 1 d . . . 
H26B H 0.3406 0.6354 0.2691 0.049 Uiso 1 1 calc R . . 
C27B C 0.28002(16) 0.5413(3) 0.05985(12) 0.0248(10) Uani 1 1 d . . . 
C28B C 0.32827(16) 0.5612(3) 0.07220(12) 0.0284(11) Uani 1 1 d . . . 
H28B H 0.3439 0.5969 0.0980 0.034 Uiso 1 1 calc R . . 
C29B C 0.35425(17) 0.5299(3) 0.04744(14) 0.0356(12) Uani 1 1 d . . . 
H29B H 0.3874 0.5437 0.0564 0.043 Uiso 1 1 calc R . . 
C30B C 0.33203(19) 0.4791(3) 0.01013(14) 0.0425(13) Uani 1 1 d . . . 
H30B H 0.3495 0.4592 -0.0074 0.051 Uiso 1 1 calc R . . 
C31B C 0.28404(19) 0.4565(3) -0.00222(14) 0.0394(12) Uani 1 1 d . . . 
H31B H 0.2688 0.4198 -0.0278 0.047 Uiso 1 1 calc R . . 
C32B C 0.25837(17) 0.4870(3) 0.02249(12) 0.0313(11) Uani 1 1 d . . . 
H32B H 0.2255 0.4708 0.0140 0.038 Uiso 1 1 calc R . . 
C33B C 0.07430(15) 0.8170(3) -0.00282(12) 0.0302(10) Uani 1 1 d . . . 
C34B C 0.06009(16) 0.7818(3) -0.04561(13) 0.0385(12) Uani 1 1 d . . . 
H34B H 0.0714 0.7228 -0.0506 0.046 Uiso 1 1 calc R . . 
C35B C 0.02961(18) 0.8323(4) -0.08080(14) 0.0504(14) Uani 1 1 d . . . 
H35B H 0.0195 0.8073 -0.1097 0.060 Uiso 1 1 calc R . . 
C36B C 0.01389(18) 0.9186(4) -0.07391(16) 0.0546(16) Uani 1 1 d . . . 
H36B H -0.0076 0.9525 -0.0980 0.066 Uiso 1 1 calc R . . 
C37B C 0.02925(17) 0.9557(4) -0.03227(15) 0.0486(14) Uani 1 1 d . . . 
H37B H 0.0191 1.0161 -0.0277 0.058 Uiso 1 1 calc R . . 
C38B C 0.05970(16) 0.9048(3) 0.00338(14) 0.0378(12) Uani 1 1 d . . . 
H38B H 0.0704 0.9309 0.0321 0.045 Uiso 1 1 calc R . . 
C39B C 0.03036(17) 0.5641(3) 0.16046(13) 0.0358(12) Uani 1 1 d . . . 
C40B C 0.00820(19) 0.6023(3) 0.18702(15) 0.0444(13) Uani 1 1 d . . . 
H40B H 0.0210 0.6570 0.2034 0.053 Uiso 1 1 calc R . . 
C41B C -0.03248(19) 0.5620(4) 0.19005(16) 0.0481(14) Uani 1 1 d . . . 
H41B H -0.0468 0.5888 0.2088 0.058 Uiso 1 1 calc R . . 
C42B C -0.05196(19) 0.4848(4) 0.16654(17) 0.0546(15) Uani 1 1 d . . . 
H42B H -0.0797 0.4576 0.1690 0.066 Uiso 1 1 calc R . . 
C43B C -0.0314(2) 0.4454(4) 0.13894(16) 0.0578(15) Uani 1 1 d . . . 
H43B H -0.0450 0.3915 0.1223 0.069 Uiso 1 1 calc R . . 
C44B C 0.00938(19) 0.4855(4) 0.13589(15) 0.0479(14) Uani 1 1 d . . . 
H44B H 0.0232 0.4589 0.1167 0.057 Uiso 1 1 calc R . . 
  
loop_ 
 _atom_site_aniso_label 
 _atom_site_aniso_U_11 
 _atom_site_aniso_U_22 
 _atom_site_aniso_U_33 
 _atom_site_aniso_U_23 
 _atom_site_aniso_U_13 
 _atom_site_aniso_U_12 
C1 0.052(3) 0.093(5) 0.164(6) 0.000 0.014(4) 0.000 
Cl1 0.046(3) 0.092(4) 0.165(6) -0.0043(17) 0.017(3) 0.0063(13) 
C2 0.192(14) 0.144(15) 0.310(17) 0.0005(18) 0.064(15) 0.001(2) 
C3 0.192(14) 0.144(15) 0.310(17) 0.0002(10) 0.063(15) 0.0004(9) 
C4 0.192(14) 0.144(15) 0.310(17) 0.000 0.063(15) 0.000 
Ni1A 0.0225(3) 0.0254(3) 0.0147(2) 0.0002(2) 0.0057(2) 0.0014(3) 
O1A 0.035(2) 0.043(2) 0.0274(15) -0.0064(13) 0.0052(15) 0.0003(16) 
O2A 0.061(2) 0.046(2) 0.0177(15) -0.0030(13) 0.0060(15) 0.0098(17) 
N1A 0.026(2) 0.024(2) 0.0206(16) 0.0006(14) 0.0098(15) 0.0022(16) 
N2A 0.020(2) 0.024(2) 0.0181(15) 0.0021(13) 0.0061(14) 0.0017(15) 
N3A 0.016(2) 0.0252(19) 0.0191(16) 0.0029(13) 0.0073(15) -0.0009(15) 
N4A 0.025(2) 0.026(2) 0.0172(16) 0.0012(14) 0.0058(15) 0.0028(16) 
N5A 0.042(3) 0.036(2) 0.0156(17) 0.0022(15) 0.0079(17) 0.0085(19) 
C1A 0.030(3) 0.020(2) 0.0192(19) -0.0009(16) 0.0034(19) 0.005(2) 
C2A 0.037(3) 0.023(2) 0.021(2) 0.0004(17) 0.010(2) 0.007(2) 
C3A 0.031(3) 0.023(2) 0.020(2) 0.0032(16) 0.0099(19) 0.007(2) 
C4A 0.027(3) 0.020(2) 0.0192(19) 0.0025(16) 0.0071(18) 0.0042(19) 
C5A 0.031(3) 0.021(2) 0.022(2) 0.0007(16) 0.0133(19) 0.009(2) 
C6A 0.027(3) 0.020(2) 0.024(2) -0.0006(16) 0.0082(19) 0.0040(19) 
C7A 0.032(3) 0.039(3) 0.023(2) 0.0015(19) 0.0166(19) 0.008(2) 
C8A 0.027(3) 0.035(3) 0.026(2) 0.0022(18) 0.0103(19) 0.005(2) 
C9A 0.020(2) 0.026(2) 0.024(2) -0.0006(17) 0.0091(18) -0.001(2) 
C10A 0.015(2) 0.026(2) 0.022(2) 0.0065(17) 0.0048(18) -0.0038(19) 
C11A 0.017(2) 0.023(2) 0.0212(19) 0.0028(16) 0.0057(17) -0.0034(19) 
C12A 0.017(3) 0.036(3) 0.0180(19) -0.0002(17) 0.0007(17) -0.004(2) 
C13A 0.026(3) 0.037(3) 0.0172(19) -0.0050(17) 0.0065(19) -0.004(2) 
C14A 0.023(3) 0.024(2) 0.022(2) -0.0049(16) 0.0099(19) -0.004(2) 
C15A 0.024(3) 0.024(2) 0.0193(19) 0.0001(16) 0.0078(18) -0.0011(19) 
C16A 0.021(3) 0.030(2) 0.0150(18) 0.0016(16) 0.0066(18) 0.002(2) 
C17A 0.027(3) 0.046(3) 0.024(2) -0.0021(19) 0.012(2) 0.007(2) 
C18A 0.022(3) 0.053(3) 0.025(2) -0.002(2) 0.0043(19) 0.000(2) 
C19A 0.019(2) 0.035(3) 0.0202(19) -0.0021(17) 0.0070(18) 0.004(2) 
C20A 0.021(3) 0.038(3) 0.019(2) -0.0007(17) 0.0048(19) 0.001(2) 
C21A 0.033(3) 0.025(2) 0.022(2) 0.0050(17) 0.0139(19) 0.011(2) 
C22A 0.041(3) 0.035(3) 0.024(2) 0.0041(19) 0.012(2) 0.009(2) 
C23A 0.048(3) 0.049(3) 0.023(2) 0.003(2) 0.016(2) 0.016(3) 
C24A 0.048(4) 0.070(4) 0.029(2) 0.016(2) 0.023(2) 0.021(3) 
C25A 0.047(3) 0.050(3) 0.037(3) 0.012(2) 0.020(2) 0.009(3) 
C26A 0.041(3) 0.034(3) 0.029(2) 0.0052(19) 0.012(2) 0.010(2) 
C27A 0.023(3) 0.034(3) 0.021(2) 0.0008(18) 0.0095(19) 0.004(2) 
C28A 0.020(3) 0.068(3) 0.031(2) 0.009(2) 0.006(2) 0.000(3) 
C29A 0.028(3) 0.075(4) 0.038(3) 0.006(3) 0.008(2) -0.002(3) 
C30A 0.032(3) 0.066(4) 0.028(2) -0.001(2) 0.002(2) 0.024(3) 
C31A 0.045(3) 0.040(3) 0.024(2) 0.000(2) 0.004(2) 0.020(3) 
C32A 0.033(3) 0.029(3) 0.027(2) -0.0035(19) 0.008(2) 0.004(2) 
C33A 0.017(3) 0.049(3) 0.018(2) -0.0062(19) 0.0022(18) 0.000(2) 
C34A 0.053(4) 0.068(4) 0.031(2) -0.008(2) 0.023(2) -0.018(3) 
C35A 0.047(4) 0.106(5) 0.028(3) -0.008(3) 0.024(3) -0.017(4) 
C36A 0.031(3) 0.110(5) 0.021(2) -0.011(3) 0.005(2) 0.025(3) 
C37A 0.085(5) 0.068(4) 0.037(3) 0.003(3) 0.028(3) 0.037(3) 
C38A 0.064(4) 0.057(4) 0.029(2) 0.003(2) 0.020(3) 0.022(3) 
C39A 0.028(3) 0.055(3) 0.022(2) -0.011(2) 0.007(2) -0.001(2) 
C40A 0.053(4) 0.087(4) 0.033(3) -0.013(3) 0.013(3) -0.026(3) 
C41A 0.063(5) 0.127(6) 0.041(3) -0.036(4) 0.020(3) -0.053(4) 
C42A 0.041(4) 0.157(7) 0.061(4) -0.071(5) 0.025(4) -0.040(5) 
C43A 0.024(4) 0.114(6) 0.050(3) -0.043(4) -0.009(3) 0.019(4) 
C44A 0.038(3) 0.065(4) 0.037(3) -0.017(2) -0.002(2) 0.011(3) 
Ni1B 0.0305(4) 0.0285(3) 0.0186(2) 0.0022(2) 0.0127(2) 0.0033(3) 
O1B 0.060(3) 0.074(2) 0.0449(19) 0.0267(17) 0.0399(19) 0.032(2) 
O2B 0.091(3) 0.054(2) 0.0315(17) 0.0116(15) 0.0374(19) 0.023(2) 
N1B 0.038(2) 0.034(2) 0.0218(17) 0.0007(15) 0.0180(17) 0.0050(18) 
N2B 0.034(2) 0.0238(19) 0.0175(16) -0.0007(13) 0.0103(16) -0.0004(17) 
N3B 0.021(2) 0.028(2) 0.0209(16) 0.0008(14) 0.0077(15) 0.0012(17) 
N4B 0.037(2) 0.030(2) 0.0231(17) 0.0042(15) 0.0163(16) 0.0069(18) 
N5B 0.081(4) 0.029(2) 0.0218(19) 0.0039(15) 0.030(2) 0.019(2) 
C1B 0.040(3) 0.027(3) 0.034(2) 0.0086(18) 0.025(2) 0.014(2) 
C2B 0.061(4) 0.039(3) 0.037(3) 0.013(2) 0.043(3) 0.023(3) 
C3B 0.052(4) 0.027(3) 0.031(2) 0.0035(19) 0.022(2) 0.017(2) 
C4B 0.045(3) 0.024(2) 0.022(2) 0.0021(17) 0.015(2) 0.006(2) 
C5B 0.037(3) 0.024(2) 0.024(2) 0.0009(17) 0.011(2) 0.006(2) 
C6B 0.040(3) 0.025(2) 0.020(2) 0.0008(17) 0.010(2) -0.003(2) 
C7B 0.033(3) 0.030(3) 0.022(2) 0.0044(17) 0.0072(19) 0.004(2) 
C8B 0.029(3) 0.023(2) 0.033(2) 0.0046(18) 0.014(2) 0.000(2) 
C9B 0.027(3) 0.025(2) 0.019(2) 0.0015(17) 0.0065(19) -0.003(2) 
C10B 0.025(3) 0.023(2) 0.023(2) -0.0031(17) 0.0092(19) -0.008(2) 
C11B 0.022(3) 0.028(2) 0.0183(19) -0.0017(17) 0.0064(18) -0.006(2) 
C12B 0.025(3) 0.034(3) 0.022(2) 0.0011(18) 0.0145(18) 0.000(2) 
C13B 0.028(3) 0.033(3) 0.021(2) 0.0031(17) 0.0099(19) 0.000(2) 
C14B 0.025(3) 0.027(2) 0.0181(19) 0.0016(16) 0.0076(18) 0.003(2) 
C15B 0.028(3) 0.033(3) 0.021(2) 0.0003(17) 0.0094(19) -0.002(2) 
C16B 0.028(3) 0.033(3) 0.019(2) 0.0021(17) 0.0083(19) 0.006(2) 
C17B 0.035(3) 0.048(3) 0.025(2) 0.006(2) 0.018(2) 0.007(2) 
C18B 0.028(3) 0.053(3) 0.037(2) 0.003(2) 0.022(2) 0.005(2) 
C19B 0.036(3) 0.032(3) 0.029(2) 0.0051(19) 0.021(2) 0.007(2) 
C20B 0.046(3) 0.033(3) 0.038(2) 0.004(2) 0.035(2) 0.008(2) 
C21B 0.059(4) 0.016(2) 0.023(2) 0.0002(17) 0.011(2) 0.007(2) 
C22B 0.059(4) 0.029(3) 0.028(2) 0.0010(19) 0.015(2) 0.013(3) 
C23B 0.091(5) 0.028(3) 0.024(2) 0.0022(19) 0.019(3) 0.019(3) 
C24B 0.078(5) 0.028(3) 0.029(3) -0.005(2) 0.007(3) 0.013(3) 
C25B 0.068(4) 0.031(3) 0.031(3) -0.003(2) 0.001(3) 0.008(3) 
C26B 0.058(4) 0.028(3) 0.027(2) -0.0017(19) 0.006(2) 0.004(2) 
C27B 0.032(3) 0.021(2) 0.020(2) 0.0077(17) 0.0085(19) 0.009(2) 
C28B 0.026(3) 0.036(3) 0.022(2) 0.0070(18) 0.008(2) 0.001(2) 
C29B 0.033(3) 0.042(3) 0.037(3) 0.015(2) 0.018(2) 0.006(2) 
C30B 0.052(4) 0.049(3) 0.034(3) 0.009(2) 0.024(3) 0.018(3) 
C31B 0.048(4) 0.038(3) 0.029(2) -0.002(2) 0.011(2) 0.004(3) 
C32B 0.032(3) 0.037(3) 0.031(2) 0.0005(19) 0.018(2) 0.003(2) 
C33B 0.022(3) 0.042(3) 0.029(2) 0.009(2) 0.0125(19) 0.001(2) 
C34B 0.034(3) 0.051(3) 0.029(2) 0.006(2) 0.009(2) -0.003(2) 
C35B 0.033(3) 0.083(4) 0.032(3) 0.019(3) 0.008(2) -0.006(3) 
C36B 0.035(3) 0.089(5) 0.044(3) 0.039(3) 0.020(3) 0.019(3) 
C37B 0.044(3) 0.066(4) 0.052(3) 0.030(3) 0.037(3) 0.026(3) 
C38B 0.035(3) 0.050(3) 0.041(3) 0.014(2) 0.028(2) 0.009(3) 
C39B 0.041(3) 0.042(3) 0.035(2) 0.010(2) 0.025(2) 0.012(2) 
C40B 0.061(4) 0.038(3) 0.050(3) 0.008(2) 0.041(3) 0.010(3) 
C41B 0.052(4) 0.053(4) 0.059(3) 0.017(3) 0.043(3) 0.015(3) 
C42B 0.037(3) 0.073(4) 0.064(3) 0.020(3) 0.031(3) -0.001(3) 
C43B 0.048(4) 0.072(4) 0.055(3) 0.002(3) 0.020(3) -0.002(3) 
C44B 0.044(4) 0.067(4) 0.041(3) 0.008(3) 0.024(3) 0.013(3) 
  
_geom_special_details 
; 
 All esds (except the esd in the dihedral angle between two l.s. planes) 
 are estimated using the full covariance matrix.  The cell esds are taken 
 into account individually in the estimation of esds in distances, angles 
 and torsion angles; correlations between esds in cell parameters are only 
 used when they are defined by crystal symmetry.  An approximate (isotropic) 
 treatment of cell esds is used for estimating esds involving l.s. planes. 
; 
  
loop_ 
 _geom_bond_atom_site_label_1 
 _geom_bond_atom_site_label_2 
 _geom_bond_distance 
 _geom_bond_site_symmetry_2 
 _geom_bond_publ_flag 
C1 Cl1 1.655(15) . ? 
C1 Cl1 1.655(15) 2 ? 
C1 H1A 0.9900 . ? 
C1 H1B 0.9900 . ? 
C2 C3 1.378(16) . ? 
C2 H2A 0.9800 . ? 
C2 H2B 0.9800 . ? 
C2 H2C 0.9800 . ? 
C3 C4 1.395(13) . ? 
C3 H3A 0.9900 . ? 
C3 H3B 0.9900 . ? 
C4 C3 1.395(13) 2 ? 
C4 H4A 0.9900 . ? 
C4 H4B 0.9900 . ? 
Ni1A N4A 1.906(4) . ? 
Ni1A N3A 1.924(3) . ? 
Ni1A N2A 1.925(3) . ? 
Ni1A N1A 1.927(3) . ? 
O1A C2A 1.235(5) . ? 
O2A N5A 1.273(4) . ? 
N1A C1A 1.374(5) . ? 
N1A C4A 1.382(5) . ? 
N2A C6A 1.369(5) . ? 
N2A C9A 1.403(5) . ? 
N3A C11A 1.373(5) . ? 
N3A C14A 1.386(5) . ? 
N4A C19A 1.372(5) . ? 
N4A C16A 1.395(5) . ? 
N5A C3A 1.329(5) . ? 
N5A C22A 1.429(6) . ? 
C1A C20A 1.362(6) . ? 
C1A C2A 1.504(5) . ? 
C2A C3A 1.445(6) . ? 
C3A C4A 1.423(5) . ? 
C4A C5A 1.369(6) . ? 
C5A C6A 1.417(5) . ? 
C5A C21A 1.460(5) . ? 
C6A C7A 1.419(6) . ? 
C7A C8A 1.348(5) . ? 
C7A H7A 0.9500 . ? 
C8A C9A 1.417(6) . ? 
C8A H8A 0.9500 . ? 
C9A C10A 1.377(5) . ? 
C10A C11A 1.390(5) . ? 
C10A C27A 1.489(5) . ? 
C11A C12A 1.424(5) . ? 
C12A C13A 1.334(6) . ? 
C12A H12A 0.9500 . ? 
C13A C14A 1.427(5) . ? 
C13A H13A 0.9500 . ? 
C14A C15A 1.372(6) . ? 
C15A C16A 1.385(5) . ? 
C15A C33A 1.497(5) . ? 
C16A C17A 1.417(6) . ? 
C17A C18A 1.352(5) . ? 
C17A H17A 0.9500 . ? 
C18A C19A 1.414(6) . ? 
C18A H18A 0.9500 . ? 
C19A C20A 1.413(5) . ? 
C20A C39A 1.494(6) . ? 
C21A C26A 1.391(6) . ? 
C21A C22A 1.410(5) . ? 
C22A C23A 1.383(6) . ? 
C23A C24A 1.374(7) . ? 
C23A H23A 0.9500 . ? 
C24A C25A 1.374(6) . ? 
C24A H24A 0.9500 . ? 
C25A C26A 1.389(6) . ? 
C25A H25A 0.9500 . ? 
C26A H26A 0.9500 . ? 
C27A C28A 1.367(6) . ? 
C27A C32A 1.385(5) . ? 
C28A C29A 1.387(6) . ? 
C28A H28A 0.9500 . ? 
C29A C30A 1.365(7) . ? 
C29A H29A 0.9500 . ? 
C30A C31A 1.370(7) . ? 
C30A H30A 0.9500 . ? 
C31A C32A 1.384(6) . ? 
C31A H31A 0.9500 . ? 
C32A H32A 0.9500 . ? 
C33A C38A 1.377(6) . ? 
C33A C34A 1.384(6) . ? 
C34A C35A 1.382(6) . ? 
C34A H34A 0.9500 . ? 
C35A C36A 1.363(7) . ? 
C35A H35A 0.9500 . ? 
C36A C37A 1.360(7) . ? 
C36A H36A 0.9500 . ? 
C37A C38A 1.387(6) . ? 
C37A H37A 0.9500 . ? 
C38A H38A 0.9500 . ? 
C39A C40A 1.373(7) . ? 
C39A C44A 1.383(6) . ? 
C40A C41A 1.397(7) . ? 
C40A H40A 0.9500 . ? 
C41A C42A 1.357(9) . ? 
C41A H41A 0.9500 . ? 
C42A C43A 1.372(8) . ? 
C42A H42A 0.9500 . ? 
C43A C44A 1.382(7) . ? 
C43A H43A 0.9500 . ? 
C44A H44A 0.9500 . ? 
Ni1B N1B 1.901(3) . ? 
Ni1B N4B 1.904(4) . ? 
Ni1B N3B 1.913(3) . ? 
Ni1B N2B 1.924(4) . ? 
O1B C2B 1.222(5) . ? 
O2B N5B 1.266(4) . ? 
N1B C1B 1.374(5) . ? 
N1B C4B 1.384(5) . ? 
N2B C6B 1.358(5) . ? 
N2B C9B 1.397(5) . ? 
N3B C11B 1.370(5) . ? 
N3B C14B 1.386(5) . ? 
N4B C19B 1.367(5) . ? 
N4B C16B 1.386(5) . ? 
N5B C3B 1.350(5) . ? 
N5B C22B 1.435(6) . ? 
C1B C20B 1.375(6) . ? 
C1B C2B 1.504(5) . ? 
C2B C3B 1.440(7) . ? 
C3B C4B 1.425(6) . ? 
C4B C5B 1.370(6) . ? 
C5B C6B 1.416(6) . ? 
C5B C21B 1.454(5) . ? 
C6B C7B 1.424(6) . ? 
C7B C8B 1.340(5) . ? 
C7B H7B 0.9500 . ? 
C8B C9B 1.423(5) . ? 
C8B H8B 0.9500 . ? 
C9B C10B 1.380(5) . ? 
C10B C11B 1.411(5) . ? 
C10B C27B 1.491(6) . ? 
C11B C12B 1.419(5) . ? 
C12B C13B 1.348(6) . ? 
C12B H12B 0.9500 . ? 
C13B C14B 1.429(5) . ? 
C13B H13B 0.9500 . ? 
C14B C15B 1.380(6) . ? 
C15B C16B 1.383(5) . ? 
C15B C33B 1.502(5) . ? 
C16B C17B 1.408(6) . ? 
C17B C18B 1.354(6) . ? 
C17B H17B 0.9500 . ? 
C18B C19B 1.429(6) . ? 
C18B H18B 0.9500 . ? 
C19B C20B 1.401(5) . ? 
C20B C39B 1.493(6) . ? 
C21B C22B 1.398(6) . ? 
C21B C26B 1.402(7) . ? 
C22B C23B 1.391(6) . ? 
C23B C24B 1.372(7) . ? 
C23B H23B 0.9500 . ? 
C24B C25B 1.380(7) . ? 
C24B H24B 0.9500 . ? 
C25B C26B 1.371(6) . ? 
C25B H25B 0.9500 . ? 
C26B H26B 0.9500 . ? 
C27B C28B 1.384(6) . ? 
C27B C32B 1.393(5) . ? 
C28B C29B 1.388(6) . ? 
C28B H28B 0.9500 . ? 
C29B C30B 1.366(6) . ? 
C29B H29B 0.9500 . ? 
C30B C31B 1.385(6) . ? 
C30B H30B 0.9500 . ? 
C31B C32B 1.376(6) . ? 
C31B H31B 0.9500 . ? 
C32B H32B 0.9500 . ? 
C33B C38B 1.376(6) . ? 
C33B C34B 1.396(5) . ? 
C34B C35B 1.383(6) . ? 
C34B H34B 0.9500 . ? 
C35B C36B 1.376(7) . ? 
C35B H35B 0.9500 . ? 
C36B C37B 1.372(7) . ? 
C36B H36B 0.9500 . ? 
C37B C38B 1.394(6) . ? 
C37B H37B 0.9500 . ? 
C38B H38B 0.9500 . ? 
C39B C40B 1.385(6) . ? 
C39B C44B 1.395(6) . ? 
C40B C41B 1.388(7) . ? 
C40B H40B 0.9500 . ? 
C41B C42B 1.355(7) . ? 
C41B H41B 0.9500 . ? 
C42B C43B 1.387(7) . ? 
C42B H42B 0.9500 . ? 
C43B C44B 1.389(7) . ? 
C43B H43B 0.9500 . ? 
C44B H44B 0.9500 . ? 
  
loop_ 
 _geom_angle_atom_site_label_1 
 _geom_angle_atom_site_label_2 
 _geom_angle_atom_site_label_3 
 _geom_angle 
 _geom_angle_site_symmetry_1 
 _geom_angle_site_symmetry_3 
 _geom_angle_publ_flag 
Cl1 C1 Cl1 123.4(19) . 2 ? 
Cl1 C1 H1A 106.5 . . ? 
Cl1 C1 H1A 106.5 2 . ? 
Cl1 C1 H1B 106.5 . . ? 
Cl1 C1 H1B 106.5 2 . ? 
H1A C1 H1B 106.5 . . ? 
C3 C2 H2A 109.5 . . ? 
C3 C2 H2B 109.5 . . ? 
H2A C2 H2B 109.5 . . ? 
C3 C2 H2C 109.5 . . ? 
H2A C2 H2C 109.5 . . ? 
H2B C2 H2C 109.5 . . ? 
C2 C3 C4 124.6(18) . . ? 
C2 C3 H3A 106.2 . . ? 
C4 C3 H3A 106.2 . . ? 
C2 C3 H3B 106.2 . . ? 
C4 C3 H3B 106.2 . . ? 
H3A C3 H3B 106.4 . . ? 
C3 C4 C3 127(2) . 2 ? 
C3 C4 H4A 105.7 . . ? 
C3 C4 H4A 105.7 2 . ? 
C3 C4 H4B 105.7 . . ? 
C3 C4 H4B 105.7 2 . ? 
H4A C4 H4B 106.1 . . ? 
N4A Ni1A N3A 89.71(13) . . ? 
N4A Ni1A N2A 179.40(14) . . ? 
N3A Ni1A N2A 90.40(13) . . ? 
N4A Ni1A N1A 89.35(13) . . ? 
N3A Ni1A N1A 177.70(14) . . ? 
N2A Ni1A N1A 90.56(13) . . ? 
C1A N1A C4A 107.6(3) . . ? 
C1A N1A Ni1A 127.5(3) . . ? 
C4A N1A Ni1A 124.8(3) . . ? 
C6A N2A C9A 104.4(3) . . ? 
C6A N2A Ni1A 128.8(3) . . ? 
C9A N2A Ni1A 126.7(2) . . ? 
C11A N3A C14A 105.0(3) . . ? 
C11A N3A Ni1A 127.3(3) . . ? 
C14A N3A Ni1A 127.5(3) . . ? 
C19A N4A C16A 103.5(3) . . ? 
C19A N4A Ni1A 127.9(3) . . ? 
C16A N4A Ni1A 128.6(3) . . ? 
O2A N5A C3A 122.8(4) . . ? 
O2A N5A C22A 118.6(3) . . ? 
C3A N5A C22A 118.6(3) . . ? 
C20A C1A N1A 125.7(3) . . ? 
C20A C1A C2A 123.8(4) . . ? 
N1A C1A C2A 110.2(4) . . ? 
O1A C2A C3A 130.3(4) . . ? 
O1A C2A C1A 126.6(4) . . ? 
C3A C2A C1A 103.2(3) . . ? 
N5A C3A C4A 123.0(4) . . ? 
N5A C3A C2A 128.6(4) . . ? 
C4A C3A C2A 107.7(3) . . ? 
C5A C4A N1A 128.2(3) . . ? 
C5A C4A C3A 120.3(4) . . ? 
N1A C4A C3A 111.1(4) . . ? 
C4A C5A C6A 120.2(4) . . ? 
C4A C5A C21A 116.9(3) . . ? 
C6A C5A C21A 122.1(4) . . ? 
N2A C6A C5A 123.3(4) . . ? 
N2A C6A C7A 111.1(3) . . ? 
C5A C6A C7A 125.0(4) . . ? 
C8A C7A C6A 107.2(4) . . ? 
C8A C7A H7A 126.4 . . ? 
C6A C7A H7A 126.4 . . ? 
C7A C8A C9A 107.4(4) . . ? 
C7A C8A H8A 126.3 . . ? 
C9A C8A H8A 126.3 . . ? 
C10A C9A N2A 124.5(4) . . ? 
C10A C9A C8A 125.5(4) . . ? 
N2A C9A C8A 109.9(3) . . ? 
C9A C10A C11A 122.8(3) . . ? 
C9A C10A C27A 120.1(4) . . ? 
C11A C10A C27A 116.9(3) . . ? 
N3A C11A C10A 125.0(3) . . ? 
N3A C11A C12A 110.5(3) . . ? 
C10A C11A C12A 124.1(3) . . ? 
C13A C12A C11A 107.1(3) . . ? 
C13A C12A H12A 126.4 . . ? 
C11A C12A H12A 126.4 . . ? 
C12A C13A C14A 107.8(4) . . ? 
C12A C13A H13A 126.1 . . ? 
C14A C13A H13A 126.1 . . ? 
C15A C14A N3A 125.4(3) . . ? 
C15A C14A C13A 124.9(4) . . ? 
N3A C14A C13A 109.5(4) . . ? 
C14A C15A C16A 122.3(4) . . ? 
C14A C15A C33A 118.6(3) . . ? 
C16A C15A C33A 118.6(4) . . ? 
C15A C16A N4A 123.7(4) . . ? 
C15A C16A C17A 124.1(4) . . ? 
N4A C16A C17A 111.4(3) . . ? 
C18A C17A C16A 106.0(4) . . ? 
C18A C17A H17A 127.0 . . ? 
C16A C17A H17A 127.0 . . ? 
C17A C18A C19A 107.7(4) . . ? 
C17A C18A H18A 126.1 . . ? 
C19A C18A H18A 126.1 . . ? 
N4A C19A C20A 125.2(4) . . ? 
N4A C19A C18A 111.3(3) . . ? 
C20A C19A C18A 123.4(4) . . ? 
C1A C20A C19A 120.4(4) . . ? 
C1A C20A C39A 124.9(3) . . ? 
C19A C20A C39A 114.6(4) . . ? 
C26A C21A C22A 116.2(4) . . ? 
C26A C21A C5A 124.2(4) . . ? 
C22A C21A C5A 119.6(4) . . ? 
C23A C22A C21A 121.7(5) . . ? 
C23A C22A N5A 118.8(4) . . ? 
C21A C22A N5A 119.5(4) . . ? 
C24A C23A C22A 119.8(4) . . ? 
C24A C23A H23A 120.1 . . ? 
C22A C23A H23A 120.1 . . ? 
C23A C24A C25A 120.1(4) . . ? 
C23A C24A H24A 120.0 . . ? 
C25A C24A H24A 120.0 . . ? 
C24A C25A C26A 119.9(5) . . ? 
C24A C25A H25A 120.0 . . ? 
C26A C25A H25A 120.0 . . ? 
C25A C26A C21A 121.8(4) . . ? 
C25A C26A H26A 119.1 . . ? 
C21A C26A H26A 119.1 . . ? 
C28A C27A C32A 118.4(4) . . ? 
C28A C27A C10A 122.1(4) . . ? 
C32A C27A C10A 119.4(4) . . ? 
C27A C28A C29A 120.7(4) . . ? 
C27A C28A H28A 119.6 . . ? 
C29A C28A H28A 119.6 . . ? 
C30A C29A C28A 120.1(5) . . ? 
C30A C29A H29A 119.9 . . ? 
C28A C29A H29A 119.9 . . ? 
C29A C30A C31A 120.3(4) . . ? 
C29A C30A H30A 119.8 . . ? 
C31A C30A H30A 119.8 . . ? 
C30A C31A C32A 119.2(4) . . ? 
C30A C31A H31A 120.4 . . ? 
C32A C31A H31A 120.4 . . ? 
C31A C32A C27A 121.1(4) . . ? 
C31A C32A H32A 119.4 . . ? 
C27A C32A H32A 119.4 . . ? 
C38A C33A C34A 119.6(4) . . ? 
C38A C33A C15A 120.9(4) . . ? 
C34A C33A C15A 119.5(4) . . ? 
C35A C34A C33A 120.0(5) . . ? 
C35A C34A H34A 120.0 . . ? 
C33A C34A H34A 120.0 . . ? 
C36A C35A C34A 120.3(5) . . ? 
C36A C35A H35A 119.8 . . ? 
C34A C35A H35A 119.8 . . ? 
C37A C36A C35A 119.7(5) . . ? 
C37A C36A H36A 120.1 . . ? 
C35A C36A H36A 120.1 . . ? 
C36A C37A C38A 121.2(5) . . ? 
C36A C37A H37A 119.4 . . ? 
C38A C37A H37A 119.4 . . ? 
C33A C38A C37A 119.1(5) . . ? 
C33A C38A H38A 120.5 . . ? 
C37A C38A H38A 120.5 . . ? 
C40A C39A C44A 118.1(5) . . ? 
C40A C39A C20A 119.7(4) . . ? 
C44A C39A C20A 121.9(4) . . ? 
C39A C40A C41A 121.6(6) . . ? 
C39A C40A H40A 119.2 . . ? 
C41A C40A H40A 119.2 . . ? 
C42A C41A C40A 119.5(6) . . ? 
C42A C41A H41A 120.2 . . ? 
C40A C41A H41A 120.2 . . ? 
C41A C42A C43A 119.4(6) . . ? 
C41A C42A H42A 120.3 . . ? 
C43A C42A H42A 120.3 . . ? 
C42A C43A C44A 121.4(6) . . ? 
C42A C43A H43A 119.3 . . ? 
C44A C43A H43A 119.3 . . ? 
C43A C44A C39A 119.8(6) . . ? 
C43A C44A H44A 120.1 . . ? 
C39A C44A H44A 120.1 . . ? 
N1B Ni1B N4B 89.48(15) . . ? 
N1B Ni1B N3B 179.31(15) . . ? 
N4B Ni1B N3B 89.83(14) . . ? 
N1B Ni1B N2B 90.75(14) . . ? 
N4B Ni1B N2B 176.86(14) . . ? 
N3B Ni1B N2B 89.94(14) . . ? 
C1B N1B C4B 108.3(3) . . ? 
C1B N1B Ni1B 127.6(3) . . ? 
C4B N1B Ni1B 124.0(3) . . ? 
C6B N2B C9B 104.8(3) . . ? 
C6B N2B Ni1B 128.6(3) . . ? 
C9B N2B Ni1B 125.8(2) . . ? 
C11B N3B C14B 105.7(3) . . ? 
C11B N3B Ni1B 127.1(2) . . ? 
C14B N3B Ni1B 127.2(3) . . ? 
C19B N4B C16B 105.8(3) . . ? 
C19B N4B Ni1B 126.4(3) . . ? 
C16B N4B Ni1B 127.6(3) . . ? 
O2B N5B C3B 121.5(5) . . ? 
O2B N5B C22B 120.8(4) . . ? 
C3B N5B C22B 117.7(4) . . ? 
N1B C1B C20B 125.0(4) . . ? 
N1B C1B C2B 110.0(4) . . ? 
C20B C1B C2B 124.9(4) . . ? 
O1B C2B C3B 129.3(4) . . ? 
O1B C2B C1B 127.9(5) . . ? 
C3B C2B C1B 102.8(4) . . ? 
N5B C3B C4B 122.1(5) . . ? 
N5B C3B C2B 128.5(4) . . ? 
C4B C3B C2B 108.6(4) . . ? 
C5B C4B N1B 128.0(4) . . ? 
C5B C4B C3B 121.4(4) . . ? 
N1B C4B C3B 109.9(4) . . ? 
C4B C5B C6B 119.7(4) . . ? 
C4B C5B C21B 115.6(4) . . ? 
C6B C5B C21B 123.7(4) . . ? 
N2B C6B C5B 122.7(4) . . ? 
N2B C6B C7B 110.7(3) . . ? 
C5B C6B C7B 125.9(4) . . ? 
C8B C7B C6B 107.6(4) . . ? 
C8B C7B H7B 126.2 . . ? 
C6B C7B H7B 126.2 . . ? 
C7B C8B C9B 106.8(4) . . ? 
C7B C8B H8B 126.6 . . ? 
C9B C8B H8B 126.6 . . ? 
C10B C9B N2B 124.0(4) . . ? 
C10B C9B C8B 125.5(4) . . ? 
N2B C9B C8B 109.9(3) . . ? 
C9B C10B C11B 121.1(4) . . ? 
C9B C10B C27B 122.2(4) . . ? 
C11B C10B C27B 116.5(3) . . ? 
N3B C11B C10B 125.3(3) . . ? 
N3B C11B C12B 110.3(3) . . ? 
C10B C11B C12B 124.2(4) . . ? 
C13B C12B C11B 107.2(4) . . ? 
C13B C12B H12B 126.4 . . ? 
C11B C12B H12B 126.4 . . ? 
C12B C13B C14B 107.4(3) . . ? 
C12B C13B H13B 126.3 . . ? 
C14B C13B H13B 126.3 . . ? 
C15B C14B N3B 123.8(4) . . ? 
C15B C14B C13B 126.3(4) . . ? 
N3B C14B C13B 109.1(4) . . ? 
C14B C15B C16B 122.6(4) . . ? 
C14B C15B C33B 120.0(4) . . ? 
C16B C15B C33B 116.9(4) . . ? 
C15B C16B N4B 124.4(4) . . ? 
C15B C16B C17B 125.4(4) . . ? 
N4B C16B C17B 109.4(4) . . ? 
C18B C17B C16B 108.3(4) . . ? 
C18B C17B H17B 125.9 . . ? 
C16B C17B H17B 125.9 . . ? 
C17B C18B C19B 106.2(4) . . ? 
C17B C18B H18B 126.9 . . ? 
C19B C18B H18B 126.9 . . ? 
N4B C19B C20B 125.5(4) . . ? 
N4B C19B C18B 110.2(3) . . ? 
C20B C19B C18B 123.9(4) . . ? 
C1B C20B C19B 119.9(4) . . ? 
C1B C20B C39B 122.9(4) . . ? 
C19B C20B C39B 117.2(4) . . ? 
C22B C21B C26B 115.7(4) . . ? 
C22B C21B C5B 121.3(5) . . ? 
C26B C21B C5B 122.9(4) . . ? 
C23B C22B C21B 123.9(5) . . ? 
C23B C22B N5B 116.6(5) . . ? 
C21B C22B N5B 119.4(4) . . ? 
C24B C23B C22B 117.4(5) . . ? 
C24B C23B H23B 121.3 . . ? 
C22B C23B H23B 121.3 . . ? 
C23B C24B C25B 121.0(5) . . ? 
C23B C24B H24B 119.5 . . ? 
C25B C24B H24B 119.5 . . ? 
C26B C25B C24B 120.5(5) . . ? 
C26B C25B H25B 119.7 . . ? 
C24B C25B H25B 119.7 . . ? 
C25B C26B C21B 121.4(5) . . ? 
C25B C26B H26B 119.3 . . ? 
C21B C26B H26B 119.3 . . ? 
C28B C27B C32B 118.3(4) . . ? 
C28B C27B C10B 122.5(4) . . ? 
C32B C27B C10B 119.1(4) . . ? 
C27B C28B C29B 121.0(4) . . ? 
C27B C28B H28B 119.5 . . ? 
C29B C28B H28B 119.5 . . ? 
C30B C29B C28B 119.8(5) . . ? 
C30B C29B H29B 120.1 . . ? 
C28B C29B H29B 120.1 . . ? 
C29B C30B C31B 120.1(4) . . ? 
C29B C30B H30B 120.0 . . ? 
C31B C30B H30B 120.0 . . ? 
C32B C31B C30B 120.1(4) . . ? 
C32B C31B H31B 120.0 . . ? 
C30B C31B H31B 120.0 . . ? 
C31B C32B C27B 120.7(4) . . ? 
C31B C32B H32B 119.7 . . ? 
C27B C32B H32B 119.7 . . ? 
C38B C33B C34B 118.8(4) . . ? 
C38B C33B C15B 120.7(4) . . ? 
C34B C33B C15B 120.4(4) . . ? 
C35B C34B C33B 120.4(5) . . ? 
C35B C34B H34B 119.8 . . ? 
C33B C34B H34B 119.8 . . ? 
C36B C35B C34B 120.0(5) . . ? 
C36B C35B H35B 120.0 . . ? 
C34B C35B H35B 120.0 . . ? 
C37B C36B C35B 120.1(4) . . ? 
C37B C36B H36B 119.9 . . ? 
C35B C36B H36B 119.9 . . ? 
C36B C37B C38B 120.1(5) . . ? 
C36B C37B H37B 120.0 . . ? 
C38B C37B H37B 120.0 . . ? 
C33B C38B C37B 120.4(4) . . ? 
C33B C38B H38B 119.8 . . ? 
C37B C38B H38B 119.8 . . ? 
C40B C39B C44B 117.5(5) . . ? 
C40B C39B C20B 125.1(4) . . ? 
C44B C39B C20B 117.4(4) . . ? 
C39B C40B C41B 121.0(5) . . ? 
C39B C40B H40B 119.5 . . ? 
C41B C40B H40B 119.5 . . ? 
C42B C41B C40B 120.7(5) . . ? 
C42B C41B H41B 119.6 . . ? 
C40B C41B H41B 119.6 . . ? 
C41B C42B C43B 120.0(5) . . ? 
C41B C42B H42B 120.0 . . ? 
C43B C42B H42B 120.0 . . ? 
C42B C43B C44B 119.4(5) . . ? 
C42B C43B H43B 120.3 . . ? 
C44B C43B H43B 120.3 . . ? 
C43B C44B C39B 121.3(5) . . ? 
C43B C44B H44B 119.4 . . ? 
C39B C44B H44B 119.4 . . ? 
  
loop_ 
 _geom_torsion_atom_site_label_1 
 _geom_torsion_atom_site_label_2 
 _geom_torsion_atom_site_label_3 
 _geom_torsion_atom_site_label_4 
 _geom_torsion 
 _geom_torsion_site_symmetry_1 
 _geom_torsion_site_symmetry_2 
 _geom_torsion_site_symmetry_3 
 _geom_torsion_site_symmetry_4 
 _geom_torsion_publ_flag 
C2 C3 C4 C3 60(2) . . . 2 ? 
N4A Ni1A N1A C1A 19.7(3) . . . . ? 
N2A Ni1A N1A C1A -160.8(3) . . . . ? 
N4A Ni1A N1A C4A -163.6(3) . . . . ? 
N2A Ni1A N1A C4A 15.8(3) . . . . ? 
N3A Ni1A N2A C6A 166.9(3) . . . . ? 
N1A Ni1A N2A C6A -15.2(3) . . . . ? 
N3A Ni1A N2A C9A -18.4(3) . . . . ? 
N1A Ni1A N2A C9A 159.5(3) . . . . ? 
N4A Ni1A N3A C11A -163.1(3) . . . . ? 
N2A Ni1A N3A C11A 17.4(3) . . . . ? 
N4A Ni1A N3A C14A 13.5(3) . . . . ? 
N2A Ni1A N3A C14A -165.9(3) . . . . ? 
N3A Ni1A N4A C19A 161.6(3) . . . . ? 
N1A Ni1A N4A C19A -16.3(3) . . . . ? 
N3A Ni1A N4A C16A -16.7(3) . . . . ? 
N1A Ni1A N4A C16A 165.4(3) . . . . ? 
C4A N1A C1A C20A 171.5(4) . . . . ? 
Ni1A N1A C1A C20A -11.4(6) . . . . ? 
C4A N1A C1A C2A -2.6(4) . . . . ? 
Ni1A N1A C1A C2A 174.5(2) . . . . ? 
C20A C1A C2A O1A 9.1(6) . . . . ? 
N1A C1A C2A O1A -176.6(4) . . . . ? 
C20A C1A C2A C3A -170.3(4) . . . . ? 
N1A C1A C2A C3A 3.9(4) . . . . ? 
O2A N5A C3A C4A -171.8(3) . . . . ? 
C22A N5A C3A C4A 9.3(6) . . . . ? 
O2A N5A C3A C2A -2.4(6) . . . . ? 
C22A N5A C3A C2A 178.7(4) . . . . ? 
O1A C2A C3A N5A 6.3(7) . . . . ? 
C1A C2A C3A N5A -174.3(4) . . . . ? 
O1A C2A C3A C4A 176.9(4) . . . . ? 
C1A C2A C3A C4A -3.7(4) . . . . ? 
C1A N1A C4A C5A 173.1(4) . . . . ? 
Ni1A N1A C4A C5A -4.1(6) . . . . ? 
C1A N1A C4A C3A 0.2(4) . . . . ? 
Ni1A N1A C4A C3A -177.1(2) . . . . ? 
N5A C3A C4A C5A 0.1(6) . . . . ? 
C2A C3A C4A C5A -171.2(4) . . . . ? 
N5A C3A C4A N1A 173.7(3) . . . . ? 
C2A C3A C4A N1A 2.4(4) . . . . ? 
N1A C4A C5A C6A -15.3(6) . . . . ? 
C3A C4A C5A C6A 157.1(4) . . . . ? 
N1A C4A C5A C21A 175.2(4) . . . . ? 
C3A C4A C5A C21A -12.5(5) . . . . ? 
C9A N2A C6A C5A -173.5(4) . . . . ? 
Ni1A N2A C6A C5A 2.1(6) . . . . ? 
C9A N2A C6A C7A -2.0(4) . . . . ? 
Ni1A N2A C6A C7A 173.7(3) . . . . ? 
C4A C5A C6A N2A 16.2(6) . . . . ? 
C21A C5A C6A N2A -174.8(4) . . . . ? 
C4A C5A C6A C7A -154.2(4) . . . . ? 
C21A C5A C6A C7A 14.8(6) . . . . ? 
N2A C6A C7A C8A -0.1(5) . . . . ? 
C5A C6A C7A C8A 171.3(4) . . . . ? 
C6A C7A C8A C9A 2.1(5) . . . . ? 
C6A N2A C9A C10A -173.0(4) . . . . ? 
Ni1A N2A C9A C10A 11.2(6) . . . . ? 
C6A N2A C9A C8A 3.3(4) . . . . ? 
Ni1A N2A C9A C8A -172.5(3) . . . . ? 
C7A C8A C9A C10A 172.8(4) . . . . ? 
C7A C8A C9A N2A -3.4(5) . . . . ? 
N2A C9A C10A C11A 4.5(6) . . . . ? 
C8A C9A C10A C11A -171.2(4) . . . . ? 
N2A C9A C10A C27A 179.7(4) . . . . ? 
C8A C9A C10A C27A 4.0(6) . . . . ? 
C14A N3A C11A C10A 173.7(4) . . . . ? 
Ni1A N3A C11A C10A -9.0(6) . . . . ? 
C14A N3A C11A C12A 1.1(4) . . . . ? 
Ni1A N3A C11A C12A 178.3(3) . . . . ? 
C9A C10A C11A N3A -5.8(6) . . . . ? 
C27A C10A C11A N3A 178.9(4) . . . . ? 
C9A C10A C11A C12A 165.9(4) . . . . ? 
C27A C10A C11A C12A -9.4(6) . . . . ? 
N3A C11A C12A C13A 0.5(5) . . . . ? 
C10A C11A C12A C13A -172.3(4) . . . . ? 
C11A C12A C13A C14A -1.8(5) . . . . ? 
C11A N3A C14A C15A 173.2(4) . . . . ? 
Ni1A N3A C14A C15A -4.0(6) . . . . ? 
C11A N3A C14A C13A -2.2(4) . . . . ? 
Ni1A N3A C14A C13A -179.4(3) . . . . ? 
C12A C13A C14A C15A -172.9(4) . . . . ? 
C12A C13A C14A N3A 2.5(5) . . . . ? 
N3A C14A C15A C16A -8.6(6) . . . . ? 
C13A C14A C15A C16A 166.1(4) . . . . ? 
N3A C14A C15A C33A 179.0(4) . . . . ? 
C13A C14A C15A C33A -6.3(6) . . . . ? 
C14A C15A C16A N4A 5.4(6) . . . . ? 
C33A C15A C16A N4A 177.8(4) . . . . ? 
C14A C15A C16A C17A -163.8(4) . . . . ? 
C33A C15A C16A C17A 8.6(6) . . . . ? 
C19A N4A C16A C15A -168.0(4) . . . . ? 
Ni1A N4A C16A C15A 10.6(5) . . . . ? 
C19A N4A C16A C17A 2.4(4) . . . . ? 
Ni1A N4A C16A C17A -179.0(3) . . . . ? 
C15A C16A C17A C18A 166.9(4) . . . . ? 
N4A C16A C17A C18A -3.5(5) . . . . ? 
C16A C17A C18A C19A 3.0(5) . . . . ? 
C16A N4A C19A C20A -176.9(4) . . . . ? 
Ni1A N4A C19A C20A 4.4(6) . . . . ? 
C16A N4A C19A C18A -0.5(4) . . . . ? 
Ni1A N4A C19A C18A -179.1(3) . . . . ? 
C17A C18A C19A N4A -1.7(5) . . . . ? 
C17A C18A C19A C20A 174.9(4) . . . . ? 
N1A C1A C20A C19A -8.0(6) . . . . ? 
C2A C1A C20A C19A 165.4(4) . . . . ? 
N1A C1A C20A C39A 176.0(4) . . . . ? 
C2A C1A C20A C39A -10.7(7) . . . . ? 
N4A C19A C20A C1A 11.6(6) . . . . ? 
C18A C19A C20A C1A -164.4(4) . . . . ? 
N4A C19A C20A C39A -171.9(4) . . . . ? 
C18A C19A C20A C39A 12.0(6) . . . . ? 
C4A C5A C21A C26A -162.9(4) . . . . ? 
C6A C5A C21A C26A 27.8(6) . . . . ? 
C4A C5A C21A C22A 15.7(6) . . . . ? 
C6A C5A C21A C22A -153.7(4) . . . . ? 
C26A C21A C22A C23A -7.3(6) . . . . ? 
C5A C21A C22A C23A 174.0(4) . . . . ? 
C26A C21A C22A N5A 171.9(4) . . . . ? 
C5A C21A C22A N5A -6.8(6) . . . . ? 
O2A N5A C22A C23A -5.4(6) . . . . ? 
C3A N5A C22A C23A 173.6(4) . . . . ? 
O2A N5A C22A C21A 175.4(3) . . . . ? 
C3A N5A C22A C21A -5.7(6) . . . . ? 
C21A C22A C23A C24A 2.7(7) . . . . ? 
N5A C22A C23A C24A -176.5(4) . . . . ? 
C22A C23A C24A C25A 2.8(7) . . . . ? 
C23A C24A C25A C26A -3.2(7) . . . . ? 
C24A C25A C26A C21A -1.8(7) . . . . ? 
C22A C21A C26A C25A 6.9(6) . . . . ? 
C5A C21A C26A C25A -174.5(4) . . . . ? 
C9A C10A C27A C28A -68.1(6) . . . . ? 
C11A C10A C27A C28A 107.4(5) . . . . ? 
C9A C10A C27A C32A 115.8(4) . . . . ? 
C11A C10A C27A C32A -68.8(5) . . . . ? 
C32A C27A C28A C29A 1.4(7) . . . . ? 
C10A C27A C28A C29A -174.8(4) . . . . ? 
C27A C28A C29A C30A -1.7(7) . . . . ? 
C28A C29A C30A C31A -0.5(7) . . . . ? 
C29A C30A C31A C32A 2.9(7) . . . . ? 
C30A C31A C32A C27A -3.1(6) . . . . ? 
C28A C27A C32A C31A 0.9(6) . . . . ? 
C10A C27A C32A C31A 177.2(4) . . . . ? 
C14A C15A C33A C38A -94.1(5) . . . . ? 
C16A C15A C33A C38A 93.3(5) . . . . ? 
C14A C15A C33A C34A 83.8(5) . . . . ? 
C16A C15A C33A C34A -88.9(5) . . . . ? 
C38A C33A C34A C35A -1.7(7) . . . . ? 
C15A C33A C34A C35A -179.6(4) . . . . ? 
C33A C34A C35A C36A 0.2(8) . . . . ? 
C34A C35A C36A C37A 1.0(8) . . . . ? 
C35A C36A C37A C38A -0.6(8) . . . . ? 
C34A C33A C38A C37A 2.1(7) . . . . ? 
C15A C33A C38A C37A 179.9(4) . . . . ? 
C36A C37A C38A C33A -0.9(8) . . . . ? 
C1A C20A C39A C40A -110.3(5) . . . . ? 
C19A C20A C39A C40A 73.5(6) . . . . ? 
C1A C20A C39A C44A 75.5(6) . . . . ? 
C19A C20A C39A C44A -100.7(5) . . . . ? 
C44A C39A C40A C41A 2.9(7) . . . . ? 
C20A C39A C40A C41A -171.6(5) . . . . ? 
C39A C40A C41A C42A -1.7(8) . . . . ? 
C40A C41A C42A C43A 0.0(9) . . . . ? 
C41A C42A C43A C44A 0.5(9) . . . . ? 
C42A C43A C44A C39A 0.7(8) . . . . ? 
C40A C39A C44A C43A -2.3(7) . . . . ? 
C20A C39A C44A C43A 171.9(4) . . . . ? 
N4B Ni1B N1B C1B 20.5(3) . . . . ? 
N2B Ni1B N1B C1B -156.3(3) . . . . ? 
N4B Ni1B N1B C4B -161.8(3) . . . . ? 
N2B Ni1B N1B C4B 21.3(3) . . . . ? 
N1B Ni1B N2B C6B -15.3(3) . . . . ? 
N3B Ni1B N2B C6B 164.9(3) . . . . ? 
N1B Ni1B N2B C9B 152.5(3) . . . . ? 
N3B Ni1B N2B C9B -27.4(3) . . . . ? 
N4B Ni1B N3B C11B -160.2(3) . . . . ? 
N2B Ni1B N3B C11B 16.6(3) . . . . ? 
N4B Ni1B N3B C14B 22.7(3) . . . . ? 
N2B Ni1B N3B C14B -160.4(3) . . . . ? 
N1B Ni1B N4B C19B -24.2(3) . . . . ? 
N3B Ni1B N4B C19B 155.7(3) . . . . ? 
N1B Ni1B N4B C16B 162.3(3) . . . . ? 
N3B Ni1B N4B C16B -17.8(3) . . . . ? 
C4B N1B C1B C20B 176.5(4) . . . . ? 
Ni1B N1B C1B C20B -5.6(6) . . . . ? 
C4B N1B C1B C2B -1.2(4) . . . . ? 
Ni1B N1B C1B C2B 176.7(3) . . . . ? 
N1B C1B C2B O1B -175.5(4) . . . . ? 
C20B C1B C2B O1B 6.8(7) . . . . ? 
N1B C1B C2B C3B 4.9(4) . . . . ? 
C20B C1B C2B C3B -172.8(4) . . . . ? 
O2B N5B C3B C4B -173.0(4) . . . . ? 
C22B N5B C3B C4B 8.6(6) . . . . ? 
O2B N5B C3B C2B -4.7(7) . . . . ? 
C22B N5B C3B C2B 177.0(4) . . . . ? 
O1B C2B C3B N5B 4.2(8) . . . . ? 
C1B C2B C3B N5B -176.2(4) . . . . ? 
O1B C2B C3B C4B 173.9(4) . . . . ? 
C1B C2B C3B C4B -6.6(4) . . . . ? 
C1B N1B C4B C5B 167.2(4) . . . . ? 
Ni1B N1B C4B C5B -10.9(6) . . . . ? 
C1B N1B C4B C3B -3.1(5) . . . . ? 
Ni1B N1B C4B C3B 178.9(3) . . . . ? 
N5B C3B C4B C5B 5.8(6) . . . . ? 
C2B C3B C4B C5B -164.6(4) . . . . ? 
N5B C3B C4B N1B 176.8(4) . . . . ? 
C2B C3B C4B N1B 6.3(5) . . . . ? 
N1B C4B C5B C6B -14.6(7) . . . . ? 
C3B C4B C5B C6B 154.6(4) . . . . ? 
N1B C4B C5B C21B 175.8(4) . . . . ? 
C3B C4B C5B C21B -15.0(6) . . . . ? 
C9B N2B C6B C5B -173.0(4) . . . . ? 
Ni1B N2B C6B C5B -3.2(6) . . . . ? 
C9B N2B C6B C7B -1.9(4) . . . . ? 
Ni1B N2B C6B C7B 167.9(3) . . . . ? 
C4B C5B C6B N2B 21.6(6) . . . . ? 
C21B C5B C6B N2B -169.7(4) . . . . ? 
C4B C5B C6B C7B -148.0(4) . . . . ? 
C21B C5B C6B C7B 20.7(7) . . . . ? 
N2B C6B C7B C8B -1.1(5) . . . . ? 
C5B C6B C7B C8B 169.6(4) . . . . ? 
C6B C7B C8B C9B 3.6(5) . . . . ? 
C6B N2B C9B C10B -167.7(4) . . . . ? 
Ni1B N2B C9B C10B 22.2(5) . . . . ? 
C6B N2B C9B C8B 4.1(4) . . . . ? 
Ni1B N2B C9B C8B -166.0(3) . . . . ? 
C7B C8B C9B C10B 166.7(4) . . . . ? 
C7B C8B C9B N2B -4.9(5) . . . . ? 
N2B C9B C10B C11B 3.4(6) . . . . ? 
C8B C9B C10B C11B -167.1(4) . . . . ? 
N2B C9B C10B C27B 178.2(4) . . . . ? 
C8B C9B C10B C27B 7.7(6) . . . . ? 
C14B N3B C11B C10B 178.2(4) . . . . ? 
Ni1B N3B C11B C10B 0.6(6) . . . . ? 
C14B N3B C11B C12B 3.1(4) . . . . ? 
Ni1B N3B C11B C12B -174.5(3) . . . . ? 
C9B C10B C11B N3B -15.3(6) . . . . ? 
C27B C10B C11B N3B 169.6(4) . . . . ? 
C9B C10B C11B C12B 159.2(4) . . . . ? 
C27B C10B C11B C12B -16.0(6) . . . . ? 
N3B C11B C12B C13B -0.4(5) . . . . ? 
C10B C11B C12B C13B -175.6(4) . . . . ? 
C11B C12B C13B C14B -2.4(4) . . . . ? 
C11B N3B C14B C15B 166.4(4) . . . . ? 
Ni1B N3B C14B C15B -16.1(5) . . . . ? 
C11B N3B C14B C13B -4.5(4) . . . . ? 
Ni1B N3B C14B C13B 173.0(3) . . . . ? 
C12B C13B C14B C15B -166.2(4) . . . . ? 
C12B C13B C14B N3B 4.4(4) . . . . ? 
N3B C14B C15B C16B -4.2(6) . . . . ? 
C13B C14B C15B C16B 165.1(4) . . . . ? 
N3B C14B C15B C33B -176.5(4) . . . . ? 
C13B C14B C15B C33B -7.2(6) . . . . ? 
C14B C15B C16B N4B 9.5(6) . . . . ? 
C33B C15B C16B N4B -178.0(4) . . . . ? 
C14B C15B C16B C17B -159.1(4) . . . . ? 
C33B C15B C16B C17B 13.4(6) . . . . ? 
C19B N4B C16B C15B -168.7(4) . . . . ? 
Ni1B N4B C16B C15B 5.9(6) . . . . ? 
C19B N4B C16B C17B 1.4(4) . . . . ? 
Ni1B N4B C16B C17B 176.0(3) . . . . ? 
C15B C16B C17B C18B 166.5(4) . . . . ? 
N4B C16B C17B C18B -3.5(5) . . . . ? 
C16B C17B C18B C19B 3.9(5) . . . . ? 
C16B N4B C19B C20B -171.3(4) . . . . ? 
Ni1B N4B C19B C20B 14.0(6) . . . . ? 
C16B N4B C19B C18B 1.0(4) . . . . ? 
Ni1B N4B C19B C18B -173.6(3) . . . . ? 
C17B C18B C19B N4B -3.2(5) . . . . ? 
C17B C18B C19B C20B 169.3(4) . . . . ? 
N1B C1B C20B C19B -14.1(7) . . . . ? 
C2B C1B C20B C19B 163.2(4) . . . . ? 
N1B C1B C20B C39B 167.6(4) . . . . ? 
C2B C1B C20B C39B -15.1(7) . . . . ? 
N4B C19B C20B C1B 9.8(7) . . . . ? 
C18B C19B C20B C1B -161.6(4) . . . . ? 
N4B C19B C20B C39B -171.8(4) . . . . ? 
C18B C19B C20B C39B 16.8(6) . . . . ? 
C4B C5B C21B C22B 10.5(6) . . . . ? 
C6B C5B C21B C22B -158.6(4) . . . . ? 
C4B C5B C21B C26B -164.3(4) . . . . ? 
C6B C5B C21B C26B 26.6(6) . . . . ? 
C26B C21B C22B C23B -2.7(6) . . . . ? 
C5B C21B C22B C23B -177.9(4) . . . . ? 
C26B C21B C22B N5B 178.3(4) . . . . ? 
C5B C21B C22B N5B 3.2(6) . . . . ? 
O2B N5B C22B C23B -10.1(6) . . . . ? 
C3B N5B C22B C23B 168.3(4) . . . . ? 
O2B N5B C22B C21B 168.9(4) . . . . ? 
C3B N5B C22B C21B -12.7(6) . . . . ? 
C21B C22B C23B C24B 0.5(7) . . . . ? 
N5B C22B C23B C24B 179.5(4) . . . . ? 
C22B C23B C24B C25B 0.8(7) . . . . ? 
C23B C24B C25B C26B 0.3(7) . . . . ? 
C24B C25B C26B C21B -2.7(7) . . . . ? 
C22B C21B C26B C25B 3.8(6) . . . . ? 
C5B C21B C26B C25B 178.8(4) . . . . ? 
C9B C10B C27B C28B -58.1(6) . . . . ? 
C11B C10B C27B C28B 116.9(4) . . . . ? 
C9B C10B C27B C32B 125.1(4) . . . . ? 
C11B C10B C27B C32B -59.9(5) . . . . ? 
C32B C27B C28B C29B 1.6(6) . . . . ? 
C10B C27B C28B C29B -175.2(4) . . . . ? 
C27B C28B C29B C30B 0.4(6) . . . . ? 
C28B C29B C30B C31B -2.0(6) . . . . ? 
C29B C30B C31B C32B 1.5(7) . . . . ? 
C30B C31B C32B C27B 0.6(6) . . . . ? 
C28B C27B C32B C31B -2.1(6) . . . . ? 
C10B C27B C32B C31B 174.9(4) . . . . ? 
C14B C15B C33B C38B -120.5(5) . . . . ? 
C16B C15B C33B C38B 66.8(5) . . . . ? 
C14B C15B C33B C34B 61.8(6) . . . . ? 
C16B C15B C33B C34B -110.9(5) . . . . ? 
C38B C33B C34B C35B -3.7(7) . . . . ? 
C15B C33B C34B C35B 174.1(4) . . . . ? 
C33B C34B C35B C36B 1.4(7) . . . . ? 
C34B C35B C36B C37B 1.5(8) . . . . ? 
C35B C36B C37B C38B -2.0(8) . . . . ? 
C34B C33B C38B C37B 3.2(7) . . . . ? 
C15B C33B C38B C37B -174.5(4) . . . . ? 
C36B C37B C38B C33B -0.4(7) . . . . ? 
C1B C20B C39B C40B 72.3(6) . . . . ? 
C19B C20B C39B C40B -106.1(5) . . . . ? 
C1B C20B C39B C44B -110.1(5) . . . . ? 
C19B C20B C39B C44B 71.5(5) . . . . ? 
C44B C39B C40B C41B 2.0(7) . . . . ? 
C20B C39B C40B C41B 179.6(4) . . . . ? 
C39B C40B C41B C42B -1.0(7) . . . . ? 
C40B C41B C42B C43B -0.3(8) . . . . ? 
C41B C42B C43B C44B 0.4(8) . . . . ? 
C42B C43B C44B C39B 0.8(7) . . . . ? 
C40B C39B C44B C43B -1.9(7) . . . . ? 
C20B C39B C44B C43B -179.7(4) . . . . ? 
  
_diffrn_measured_fraction_theta_max    0.970 
_diffrn_reflns_theta_full              28.00 
_diffrn_measured_fraction_theta_full   0.984 
_refine_diff_density_max    0.508 
_refine_diff_density_min   -0.570 
_refine_diff_density_rms    0.087 

 
data_12mz193_0m 
  
_audit_creation_method            SHELXL-97 
_chemical_name_systematic 
; 
 ? 
; 
_chemical_name_common             ? 
_chemical_melting_point           ? 
_chemical_formula_moiety          ? 
_chemical_formula_sum 
 'C44 H27 N5 Ni O2' 
_chemical_formula_weight          716.42 
  
loop_ 
 _atom_type_symbol 
 _atom_type_description 
 _atom_type_scat_dispersion_real 
 _atom_type_scat_dispersion_imag 
 _atom_type_scat_source 
 'C'  'C'   0.0033   0.0016 
 'International Tables Vol C Tables 4.2.6.8 and 6.1.1.4' 
 'H'  'H'   0.0000   0.0000 
 'International Tables Vol C Tables 4.2.6.8 and 6.1.1.4' 
 'N'  'N'   0.0061   0.0033 
 'International Tables Vol C Tables 4.2.6.8 and 6.1.1.4' 
 'O'  'O'   0.0106   0.0060 
 'International Tables Vol C Tables 4.2.6.8 and 6.1.1.4' 
 'Ni'  'Ni'   0.3393   1.1124 
 'International Tables Vol C Tables 4.2.6.8 and 6.1.1.4' 
  
_symmetry_cell_setting            Tetragonal 
_symmetry_space_group_name_H-M    I4(1)/a 
  
loop_ 
 _symmetry_equiv_pos_as_xyz 
 'x, y, z' 
 '-x+1/2, -y, z+1/2' 
 '-y+3/4, x+1/4, z+1/4' 
 'y+3/4, -x+3/4, z+3/4' 
 'x+1/2, y+1/2, z+1/2' 
 '-x+1, -y+1/2, z+1' 
 '-y+5/4, x+3/4, z+3/4' 
 'y+5/4, -x+5/4, z+5/4' 
 '-x, -y, -z' 
 'x-1/2, y, -z-1/2' 
 'y-3/4, -x-1/4, -z-1/4' 
 '-y-3/4, x-3/4, -z-3/4' 
 '-x+1/2, -y+1/2, -z+1/2' 
 'x, y+1/2, -z' 
 'y-1/4, -x+1/4, -z+1/4' 
 '-y-1/4, x-1/4, -z-1/4' 
  
_cell_length_a                    15.424(2) 
_cell_length_b                    15.424(2) 
_cell_length_c                    13.692(4) 
_cell_angle_alpha                 90.00 
_cell_angle_beta                  90.00 
_cell_angle_gamma                 90.00 
_cell_volume                      3257.5(11) 
_cell_formula_units_Z             4 
_cell_measurement_temperature     100(2) 
_cell_measurement_reflns_used     719 
_cell_measurement_theta_min       3.31 
_cell_measurement_theta_max       24.77 
  
_exptl_crystal_description        plate 
_exptl_crystal_colour             black
_exptl_crystal_size_max           0.34
_exptl_crystal_size_mid           0.19
_exptl_crystal_size_min           0.09
_exptl_crystal_density_meas       ? 
_exptl_crystal_density_diffrn     1.461 
_exptl_crystal_density_method     'not measured' 
_exptl_crystal_F_000              1480 
_exptl_absorpt_coefficient_mu     0.645 
_exptl_absorpt_correction_type    'multi-scan'
_exptl_absorpt_correction_T_min   0.5800  
_exptl_absorpt_correction_T_max   0.7461 
_exptl_absorpt_process_details    'Apex2  v2011.2-0 (Bruker, 2011)'
  
_exptl_special_details 
; 
The structure shows multiple disorder. The four fold crystallographic 
symmetry is not obeyed by the molecule, leading to 3:1 disorder of the 
three pyrrole units with the one substituted heterocylce. Within the 
non-pyrrole unit the keto-oxime moiety in addition flip disordered. The 
occupancies are for the two keto-oxime moieties are refined to 0.176(4) 
and 0.074(4). 
All overlapping disordered atoms were constrained to have identical ADPs. 
Hydroxyl O and oxim N atoms were restrained to be approximately isotropic. 
The keto-oxime units were restrained to be approximately flat, and 
equivalent bond distances were restrained to be similar. The pyrrole 
C(H)-C(H) distance was restrained to be 1.35(2) Angstroms, the 
equivalent distance in the substituted rings to be 1.40(2) Angstroms.  
; 
  
_diffrn_ambient_temperature       100(2) 
_diffrn_radiation_wavelength      0.71073 
_diffrn_radiation_type            MoK\a 
_diffrn_radiation_source          'fine-focus sealed tube' 
_diffrn_radiation_monochromator   graphite 
_diffrn_measurement_device_type   'Bruker AXS SMART APEX CCD diffractometer'  
_diffrn_measurement_method        '\w scans' 
_diffrn_detector_area_resol_mean  ? 
_diffrn_standards_number          0 
_diffrn_standards_interval_count  . 
_diffrn_standards_interval_time   . 
_diffrn_standards_decay_%         ?
_diffrn_reflns_number             4766 
_diffrn_reflns_av_R_equivalents   0.0391 
_diffrn_reflns_av_sigmaI/netI     0.0777 
_diffrn_reflns_limit_h_min        -21 
_diffrn_reflns_limit_h_max        18 
_diffrn_reflns_limit_k_min        -21 
_diffrn_reflns_limit_k_max        5 
_diffrn_reflns_limit_l_min        -19 
_diffrn_reflns_limit_l_max        8 
_diffrn_reflns_theta_min          1.99 
_diffrn_reflns_theta_max          30.49 
_reflns_number_total              2409 
_reflns_number_gt                 1113 
_reflns_threshold_expression      I>2\s(I) 
  
_computing_data_collection        'Apex2 v2011.2-0 (Bruker, 2011)' 
_computing_cell_refinement        'Apex2 v2011.2-0' 
_computing_data_reduction         'Apex2 v2011.2-0'
_computing_structure_solution     
'SHELXTL 6.14 (Bruker, 2003; Sheldrick, 2008)'  
_computing_structure_refinement   
;  
SHELXLE Rev548, Shelxle (H\"ubschle et al., 2011)
; 
_computing_molecular_graphics     'SHELXTL 6.14' 
_computing_publication_material   'SHELXTL 6.14'
  
_refine_special_details 
; 
 Refinement of F^2^ against ALL reflections.  The weighted R-factor wR and 
 goodness of fit S are based on F^2^, conventional R-factors R are based 
 on F, with F set to zero for negative F^2^. The threshold expression of 
 F^2^ > 2sigma(F^2^) is used only for calculating R-factors(gt) etc. and is 
 not relevant to the choice of reflections for refinement.  R-factors based 
 on F^2^ are statistically about twice as large as those based on F, and R- 
 factors based on ALL data will be even larger. 
; 
  
_refine_ls_structure_factor_coef  Fsqd 
_refine_ls_matrix_type            full 
_refine_ls_weighting_scheme       calc 
_refine_ls_weighting_details 
 'calc w=1/[\s^2^(Fo^2^)+(0.0622P)^2^+0.7544P] where P=(Fo^2^+2Fc^2^)/3' 
_atom_sites_solution_primary      direct 
_atom_sites_solution_secondary    difmap 
_atom_sites_solution_hydrogens    geom 
_refine_ls_hydrogen_treatment     constr 
_refine_ls_extinction_method      none 
_refine_ls_extinction_coef        ? 
_refine_ls_number_reflns          2409 
_refine_ls_number_parameters      162 
_refine_ls_number_restraints      44 
_refine_ls_R_factor_all           0.1318 
_refine_ls_R_factor_gt            0.0504 
_refine_ls_wR_factor_ref          0.1478 
_refine_ls_wR_factor_gt           0.1189 
_refine_ls_goodness_of_fit_ref    1.012 
_refine_ls_restrained_S_all       1.019 
_refine_ls_shift/su_max           0.000 
_refine_ls_shift/su_mean          0.000 
  
loop_ 
 _atom_site_label 
 _atom_site_type_symbol 
 _atom_site_fract_x 
 _atom_site_fract_y 
 _atom_site_fract_z 
 _atom_site_U_iso_or_equiv 
 _atom_site_adp_type 
 _atom_site_occupancy 
 _atom_site_symmetry_multiplicity 
 _atom_site_calc_flag 
 _atom_site_refinement_flags 
 _atom_site_disorder_assembly 
 _atom_site_disorder_group 
C1 C 0.34770(17) 0.63238(17) 0.1078(2) 0.0516(7) Uani 1 1 d D . . 
C2 C 0.3237(6) 0.5450(8) 0.1234(14) 0.0550(19) Uani 0.75 1 d PD A 1 
H2 H 0.2673 0.5210 0.1157 0.066 Uiso 0.75 1 calc PR A 1 
C3 C 0.3969(6) 0.5013(10) 0.1517(14) 0.0594(13) Uani 0.75 1 d PD A 1 
H3 H 0.4007 0.4414 0.1672 0.071 Uiso 0.75 1 calc PR A 1 
C4 C 0.46549(18) 0.56146(17) 0.1537(2) 0.0504(7) Uani 1 1 d D . . 
C5 C 0.55203(17) 0.53972(17) 0.1647(2) 0.0500(7) Uani 1 1 d . A . 
C6 C 0.57648(17) 0.44837(18) 0.1921(2) 0.0525(7) Uani 1 1 d . . . 
C7 C 0.5710(2) 0.38243(19) 0.1241(3) 0.0646(8) Uani 1 1 d . A . 
H7 H 0.5482 0.3940 0.0609 0.077 Uiso 1 1 calc R . . 
C8 C 0.5986(2) 0.2995(2) 0.1476(3) 0.0701(9) Uani 1 1 d . . . 
H8 H 0.5959 0.2548 0.1000 0.084 Uiso 1 1 calc R A . 
C9 C 0.6294(2) 0.2816(2) 0.2380(3) 0.0707(10) Uani 1 1 d . A . 
H9 H 0.6479 0.2246 0.2538 0.085 Uiso 1 1 calc R . . 
C10 C 0.6338(3) 0.3466(2) 0.3074(3) 0.0907(12) Uani 1 1 d . . . 
H10 H 0.6553 0.3343 0.3709 0.109 Uiso 1 1 calc R A . 
C11 C 0.6069(2) 0.4300(2) 0.2839(3) 0.0769(10) Uani 1 1 d . A . 
H11 H 0.6095 0.4746 0.3317 0.092 Uiso 1 1 calc R . . 
N1 N 0.43511(14) 0.64322(13) 0.12783(16) 0.0463(6) Uani 1 1 d . A . 
C2A C 0.321(2) 0.537(3) 0.116(6) 0.0550(19) Uani 0.176(4) 1 d PD A 2 
C3A C 0.391(2) 0.495(3) 0.156(6) 0.0594(13) Uani 0.176(4) 1 d PD A 2 
N2A N 0.3951(13) 0.4269(12) 0.1892(15) 0.066(5) Uani 0.176(4) 1 d PDU A 2 
O1A O 0.2438(9) 0.5152(9) 0.1030(12) 0.067(4) Uani 0.176(4) 1 d PDU A 2 
O2A O 0.3102(12) 0.3918(11) 0.2046(15) 0.123(5) Uani 0.176(4) 1 d PD A 2 
H2A H 0.2774 0.4076 0.1590 0.184 Uiso 0.176(4) 1 calc PRD A 2 
C2B C 0.3307(16) 0.534(3) 0.093(3) 0.0550(19) Uani 0.074(4) 1 d PD A 3 
C3B C 0.3866(19) 0.500(3) 0.166(3) 0.0594(13) Uani 0.074(4) 1 d PD A 3 
N2B N 0.264(2) 0.505(2) 0.071(3) 0.067(4) Uani 0.074(4) 1 d PD A 3 
O1B O 0.391(3) 0.440(2) 0.227(3) 0.066(5) Uani 0.074(4) 1 d PD A 3 
O2B O 0.259(3) 0.417(2) 0.106(3) 0.123(5) Uani 0.074(4) 1 d PDU A 3 
H2B H 0.3046 0.4037 0.1353 0.184 Uiso 0.074(4) 1 calc PRD A 3 
Ni01 Ni 0.5000 0.7500 0.1250 0.0454(3) Uani 1 4 d S . . 
 
loop_ 
 _atom_site_aniso_label 
 _atom_site_aniso_U_11 
 _atom_site_aniso_U_22 
 _atom_site_aniso_U_33 
 _atom_site_aniso_U_23 
 _atom_site_aniso_U_13 
 _atom_site_aniso_U_12 
C1 0.0468(15) 0.0433(15) 0.0647(18) 0.0008(13) -0.0014(14) -0.0015(12) 
C2 0.0461(17) 0.047(3) 0.072(4) 0.002(3) 0.001(2) -0.0052(15) 
C3 0.049(2) 0.044(2) 0.086(3) 0.020(2) 0.000(2) -0.002(2) 
C4 0.0484(16) 0.0443(15) 0.0586(16) 0.0087(13) -0.0014(13) -0.0003(12) 
C5 0.0500(16) 0.0474(16) 0.0525(16) 0.0056(13) -0.0014(13) 0.0043(12) 
C6 0.0391(15) 0.0513(16) 0.0669(18) 0.0101(15) 0.0009(14) 0.0022(12) 
C7 0.068(2) 0.0584(19) 0.0668(19) 0.0019(17) 0.0006(17) 0.0079(15) 
C8 0.069(2) 0.0512(19) 0.090(3) -0.0019(18) 0.0076(19) 0.0052(15) 
C9 0.063(2) 0.0524(19) 0.097(3) 0.020(2) 0.0132(19) 0.0103(15) 
C10 0.112(3) 0.073(2) 0.087(3) 0.021(2) -0.009(2) 0.029(2) 
C11 0.091(3) 0.065(2) 0.074(2) 0.0078(18) -0.016(2) 0.0180(18) 
N1 0.0427(12) 0.0427(12) 0.0535(14) 0.0053(11) -0.0024(10) 0.0026(9) 
C2A 0.0461(17) 0.047(3) 0.072(4) 0.002(3) 0.001(2) -0.0052(15) 
C3A 0.049(2) 0.044(2) 0.086(3) 0.020(2) 0.000(2) -0.002(2) 
N2A 0.057(6) 0.054(7) 0.086(10) 0.012(7) 0.000(8) -0.004(5) 
O1A 0.061(7) 0.043(5) 0.098(9) 0.019(6) 0.000(6) -0.010(5) 
O2A 0.114(9) 0.102(8) 0.152(9) 0.029(8) -0.017(8) 0.004(7) 
C2B 0.0461(17) 0.047(3) 0.072(4) 0.002(3) 0.001(2) -0.0052(15) 
C3B 0.049(2) 0.044(2) 0.086(3) 0.020(2) 0.000(2) -0.002(2) 
N2B 0.061(7) 0.043(5) 0.098(9) 0.019(6) 0.000(6) -0.010(5) 
O1B 0.057(6) 0.054(7) 0.086(10) 0.012(7) 0.000(8) -0.004(5) 
O2B 0.114(9) 0.102(8) 0.152(9) 0.029(8) -0.017(8) 0.004(7) 
Ni01 0.0427(3) 0.0427(3) 0.0508(4) 0.000 0.000 0.000 
 
_geom_special_details 
; 
 All esds (except the esd in the dihedral angle between two l.s. planes) 
 are estimated using the full covariance matrix.  The cell esds are taken 
 into account individually in the estimation of esds in distances, angles 
 and torsion angles; correlations between esds in cell parameters are only 
 used when they are defined by crystal symmetry.  An approximate (isotropic) 
 treatment of cell esds is used for estimating esds involving l.s. planes. 
; 
 
loop_ 
 _geom_bond_atom_site_label_1 
 _geom_bond_atom_site_label_2 
 _geom_bond_distance 
 _geom_bond_site_symmetry_2 
 _geom_bond_publ_flag 
C1 C5 1.385(4) 15_565 ? 
C1 N1 1.386(3) . ? 
C1 C2 1.414(14) . ? 
C1 C2A 1.52(5) . ? 
C1 C2B 1.55(5) . ? 
C2 C3 1.372(7) . ? 
C2 H2 0.9500 . ? 
C3 C4 1.407(15) . ? 
C3 H3 0.9500 . ? 
C4 C5 1.384(4) . ? 
C4 N1 1.391(3) . ? 
C4 C3A 1.53(5) . ? 
C4 C3B 1.55(5) . ? 
C5 C1 1.385(4) 12_766 ? 
C5 C6 1.506(4) . ? 
C6 C11 1.371(4) . ? 
C6 C7 1.381(4) . ? 
C7 C8 1.387(4) . ? 
C7 H7 0.9500 . ? 
C8 C9 1.354(5) . ? 
C8 H8 0.9500 . ? 
C9 C10 1.382(5) . ? 
C9 H9 0.9500 . ? 
C10 C11 1.390(4) . ? 
C10 H10 0.9500 . ? 
C11 H11 0.9500 . ? 
N1 Ni01 1.928(2) . ? 
C2A O1A 1.25(4) . ? 
C2A C3A 1.378(18) . ? 
C3A N2A 1.15(4) . ? 
N2A O2A 1.43(2) . ? 
O2A H2A 0.8400 . ? 
C2B N2B 1.15(4) . ? 
C2B C3B 1.427(18) . ? 
C3B O1B 1.25(4) . ? 
N2B O2B 1.45(3) . ? 
O2B H2B 0.8400 . ? 
Ni01 N1 1.928(2) 12_766 ? 
Ni01 N1 1.928(2) 6_564 ? 
Ni01 N1 1.928(2) 15_565 ? 
 
loop_ 
 _geom_angle_atom_site_label_1 
 _geom_angle_atom_site_label_2 
 _geom_angle_atom_site_label_3 
 _geom_angle 
 _geom_angle_site_symmetry_1 
 _geom_angle_site_symmetry_3 
 _geom_angle_publ_flag 
C5 C1 N1 125.7(2) 15_565 . ? 
C5 C1 C2 124.1(3) 15_565 . ? 
N1 C1 C2 109.9(3) . . ? 
C5 C1 C2A 123.0(7) 15_565 . ? 
N1 C1 C2A 111.3(7) . . ? 
C5 C1 C2B 125.1(7) 15_565 . ? 
N1 C1 C2B 108.0(7) . . ? 
C3 C2 C1 107.1(4) . . ? 
C3 C2 H2 126.4 . . ? 
C1 C2 H2 126.4 . . ? 
C2 C3 C4 107.5(5) . . ? 
C2 C3 H3 126.2 . . ? 
C4 C3 H3 126.2 . . ? 
C5 C4 N1 124.9(2) . . ? 
C5 C4 C3 124.5(4) . . ? 
N1 C4 C3 109.8(4) . . ? 
C5 C4 C3A 123.8(10) . . ? 
N1 C4 C3A 110.9(8) . . ? 
C5 C4 C3B 126.6(9) . . ? 
N1 C4 C3B 108.5(9) . . ? 
C4 C5 C1 121.6(2) . 12_766 ? 
C4 C5 C6 119.7(2) . . ? 
C1 C5 C6 118.5(2) 12_766 . ? 
C11 C6 C7 119.1(3) . . ? 
C11 C6 C5 120.4(3) . . ? 
C7 C6 C5 120.4(3) . . ? 
C6 C7 C8 120.3(3) . . ? 
C6 C7 H7 119.9 . . ? 
C8 C7 H7 119.9 . . ? 
C9 C8 C7 120.5(3) . . ? 
C9 C8 H8 119.7 . . ? 
C7 C8 H8 119.7 . . ? 
C8 C9 C10 119.9(3) . . ? 
C8 C9 H9 120.1 . . ? 
C10 C9 H9 120.1 . . ? 
C9 C10 C11 119.8(4) . . ? 
C9 C10 H10 120.1 . . ? 
C11 C10 H10 120.1 . . ? 
C6 C11 C10 120.4(3) . . ? 
C6 C11 H11 119.8 . . ? 
C10 C11 H11 119.8 . . ? 
C1 N1 C4 105.6(2) . . ? 
C1 N1 Ni01 127.17(18) . . ? 
C4 N1 Ni01 127.21(18) . . ? 
O1A C2A C3A 133(2) . . ? 
O1A C2A C1 120.5(18) . . ? 
C3A C2A C1 105.5(10) . . ? 
N2A C3A C2A 129(2) . . ? 
N2A C3A C4 126(2) . . ? 
C2A C3A C4 105.5(10) . . ? 
C3A N2A O2A 111(2) . . ? 
N2A O2A H2A 109.5 . . ? 
N2B C2B C3B 125(3) . . ? 
N2B C2B C1 124(2) . . ? 
C3B C2B C1 99.3(10) . . ? 
O1B C3B C2B 141(3) . . ? 
O1B C3B C4 119(2) . . ? 
C2B C3B C4 99.9(11) . . ? 
C2B N2B O2B 109(3) . . ? 
N1 Ni01 N1 90.025(3) 12_766 6_564 ? 
N1 Ni01 N1 90.024(3) 12_766 . ? 
N1 Ni01 N1 177.70(13) 6_564 . ? 
N1 Ni01 N1 177.70(13) 12_766 15_565 ? 
N1 Ni01 N1 90.020(3) 6_564 15_565 ? 
N1 Ni01 N1 90.024(3) . 15_565 ? 
 
loop_ 
 _geom_torsion_atom_site_label_1 
 _geom_torsion_atom_site_label_2 
 _geom_torsion_atom_site_label_3 
 _geom_torsion_atom_site_label_4 
 _geom_torsion 
 _geom_torsion_site_symmetry_1 
 _geom_torsion_site_symmetry_2 
 _geom_torsion_site_symmetry_3 
 _geom_torsion_site_symmetry_4 
 _geom_torsion_publ_flag 
C5 C1 C2 C3 -175.1(5) 15_565 . . . ? 
N1 C1 C2 C3 -0.9(7) . . . . ? 
C2B C1 C2 C3 86(3) . . . . ? 
C1 C2 C3 C4 0.1(5) . . . . ? 
C2 C3 C4 C5 -169.9(4) . . . . ? 
C2 C3 C4 N1 0.7(7) . . . . ? 
N1 C4 C5 C1 -5.6(5) . . . 12_766 ? 
C3 C4 C5 C1 163.7(10) . . . 12_766 ? 
C3A C4 C5 C1 166(4) . . . 12_766 ? 
C3B C4 C5 C1 173(2) . . . 12_766 ? 
N1 C4 C5 C6 -179.4(3) . . . . ? 
C3 C4 C5 C6 -10.1(11) . . . . ? 
C3A C4 C5 C6 -7(4) . . . . ? 
C3B C4 C5 C6 0(2) . . . . ? 
C4 C5 C6 C11 -107.7(3) . . . . ? 
C1 C5 C6 C11 78.3(4) 12_766 . . . ? 
C4 C5 C6 C7 74.2(4) . . . . ? 
C1 C5 C6 C7 -99.8(3) 12_766 . . . ? 
C11 C6 C7 C8 -2.1(5) . . . . ? 
C5 C6 C7 C8 176.0(3) . . . . ? 
C6 C7 C8 C9 1.5(5) . . . . ? 
C7 C8 C9 C10 -0.4(6) . . . . ? 
C8 C9 C10 C11 -0.1(6) . . . . ? 
C7 C6 C11 C10 1.6(5) . . . . ? 
C5 C6 C11 C10 -176.5(3) . . . . ? 
C9 C10 C11 C6 -0.5(6) . . . . ? 
C5 C1 N1 C4 175.4(3) 15_565 . . . ? 
C2 C1 N1 C4 1.3(9) . . . . ? 
C2A C1 N1 C4 -3(4) . . . . ? 
C2B C1 N1 C4 -16.8(17) . . . . ? 
C5 C1 N1 Ni01 -2.5(4) 15_565 . . . ? 
C2 C1 N1 Ni01 -176.6(9) . . . . ? 
C2A C1 N1 Ni01 179(4) . . . . ? 
C2B C1 N1 Ni01 165.2(17) . . . . ? 
C5 C4 N1 C1 169.4(3) . . . . ? 
C3 C4 N1 C1 -1.3(9) . . . . ? 
C3A C4 N1 C1 -4(4) . . . . ? 
C3B C4 N1 C1 -9.9(18) . . . . ? 
C5 C4 N1 Ni01 -12.7(4) . . . . ? 
C3 C4 N1 Ni01 176.7(9) . . . . ? 
C3A C4 N1 Ni01 174(3) . . . . ? 
C3B C4 N1 Ni01 168.1(17) . . . . ? 
C5 C1 C2A O1A -1(9) 15_565 . . . ? 
N1 C1 C2A O1A 178(5) . . . . ? 
C5 C1 C2A C3A -169.3(12) 15_565 . . . ? 
N1 C1 C2A C3A 10(2) . . . . ? 
O1A C2A C3A N2A 0.00(5) . . . . ? 
C1 C2A C3A N2A 166(9) . . . . ? 
O1A C2A C3A C4 -177(9) . . . . ? 
C1 C2A C3A C4 -10.8(10) . . . . ? 
C5 C4 C3A N2A 20(9) . . . . ? 
N1 C4 C3A N2A -167(6) . . . . ? 
C5 C4 C3A C2A -163.3(14) . . . . ? 
N1 C4 C3A C2A 10(2) . . . . ? 
C2A C3A N2A O2A -13(5) . . . . ? 
C4 C3A N2A O2A 163(6) . . . . ? 
C5 C1 C2B N2B -9(5) 15_565 . . . ? 
N1 C1 C2B N2B -177(4) . . . . ? 
C5 C1 C2B C3B -153.5(12) 15_565 . . . ? 
N1 C1 C2B C3B 38.6(19) . . . . ? 
N2B C2B C3B O1B 0.00(6) . . . . ? 
C1 C2B C3B O1B 144(5) . . . . ? 
N2B C2B C3B C4 176(5) . . . . ? 
C1 C2B C3B C4 -40.3(18) . . . . ? 
C5 C4 C3B O1B 32(4) . . . . ? 
N1 C4 C3B O1B -149(3) . . . . ? 
C5 C4 C3B C2B -144.8(13) . . . . ? 
N1 C4 C3B C2B 34.4(17) . . . . ? 
C3B C2B N2B O2B -18(5) . . . . ? 
C1 C2B N2B O2B -153(4) . . . . ? 
C1 N1 Ni01 N1 -163.6(3) . . . 12_766 ? 
C4 N1 Ni01 N1 18.90(19) . . . 12_766 ? 
C1 N1 Ni01 N1 14.11(18) . . . 15_565 ? 
C4 N1 Ni01 N1 -163.4(3) . . . 15_565 ? 
 
_diffrn_measured_fraction_theta_max    0.971 
_diffrn_reflns_theta_full              28.00 
_diffrn_measured_fraction_theta_full   0.985 
_refine_diff_density_max    0.408 
_refine_diff_density_min   -0.206 
_refine_diff_density_rms    0.054 


 
data_Prosp14mz008_0m
 
_audit_creation_method            SHELXL-2013
_chemical_name_systematic
;
 ?
;
_chemical_name_common             ?
_chemical_melting_point           ?
_chemical_formula_moiety          
 'C44 H24 N6 Pd, 0.3(C6 H14), 0.34(C H2 Cl2)'
_chemical_formula_sum
 'C46.13 H28.86 Cl0.68 N6 Pd' 
_chemical_formula_weight          797.52

loop_
 _atom_type_symbol
 _atom_type_description
 _atom_type_scat_dispersion_real
 _atom_type_scat_dispersion_imag
 _atom_type_scat_source
 'C'  'C'   0.0181   0.0091
 'International Tables Vol C Tables 4.2.6.8 and 6.1.1.4'
 'H'  'H'   0.0000   0.0000
 'International Tables Vol C Tables 4.2.6.8 and 6.1.1.4'
 'N'  'N'   0.0311   0.0180
 'International Tables Vol C Tables 4.2.6.8 and 6.1.1.4'
 'Pd'  'Pd'   0.1215   3.9337
 'International Tables Vol C Tables 4.2.6.8 and 6.1.1.4'
 'Cl'  'Cl'   0.3639   0.7018
 'International Tables Vol C Tables 4.2.6.8 and 6.1.1.4'
 
_space_group_crystal_system       monoclinic
_space_group_IT_number            14
_space_group_name_H-M_alt         'P 21/c'
_space_group_name_Hall            '-P 2ybc'
 
_shelx_space_group_comment
;
The symmetry employed for this shelxl refinement is uniquely defined
by the following loop, which should always be used as a source of
symmetry information in preference to the above space-group names.
They are only intended as comments.
;
 
loop_
 _space_group_symop_operation_xyz
 'x, y, z'
 '-x, y+1/2, -z+1/2'
 '-x, -y, -z'
 'x, -y-1/2, z-1/2'
 
_cell_length_a                    14.6776(5)
_cell_length_b                    7.0794(2)
_cell_length_c                    32.3824(11)
_cell_angle_alpha                 90
_cell_angle_beta                  91.9060(13)
_cell_angle_gamma                 90
_cell_volume                      3362.95(19)
_cell_formula_units_Z             4
_cell_measurement_temperature     100(2)
_cell_measurement_reflns_used     9942
_cell_measurement_theta_min       3.0124
_cell_measurement_theta_max       66.9367
 
_exptl_crystal_description        rod 
_exptl_crystal_colour             black
_exptl_crystal_density_meas       ? 
_exptl_crystal_density_method     ?              
_exptl_crystal_density_diffrn     1.575          
_exptl_crystal_F_000              1620.5
_exptl_transmission_factor_min    ?                                             
_exptl_transmission_factor_max    ?                                             
_exptl_crystal_size_max           0.170
_exptl_crystal_size_mid           0.070
_exptl_crystal_size_min           0.050
_exptl_absorpt_coefficient_mu     5.307
_shelx_estimated_absorpt_T_min    0.466
_shelx_estimated_absorpt_T_max    0.777
_exptl_absorpt_correction_type    'multi-scan'
_exptl_absorpt_correction_T_min   0.6249  
_exptl_absorpt_correction_T_max   0.7529
_exptl_absorpt_process_details    'Apex2 v2014.1-0 (Bruker, 2014)'
 
_exptl_special_details
;
A hexane molecule located on an inversion center is disordered with 
two methylene chloride molecules. The geometries of the two CH2Cl2 molecules 
were restrained to be similar (SADI commands in Shelxl), and rigid bond 
restraints (RIGU in Shelxl) were applied for all disordered molecules. The 
two carbon atoms of the CH2Cl2 molecules were constrained to have identical 
ADPs. 
;
 
_diffrn_ambient_temperature       100(2)
_diffrn_radiation_wavelength      1.54178
_diffrn_radiation_type            CuK\a
_diffrn_source                    'I-mu-S microsource X-ray tube'
_diffrn_radiation_monochromator   'laterally graded multilayer (Goebel) mirror'   
_diffrn_measurement_device_type   'Bruker AXS Prospector CCD diffractometer' 
_diffrn_measurement_method        'omega and phi scans'
_diffrn_detector_area_resol_mean  ? 
_diffrn_reflns_number             15657
_diffrn_reflns_av_unetI/netI      0.0218
_diffrn_reflns_av_R_equivalents   0.0184
_diffrn_reflns_limit_h_min        -17
_diffrn_reflns_limit_h_max        15
_diffrn_reflns_limit_k_min        -8
_diffrn_reflns_limit_k_max        8
_diffrn_reflns_limit_l_min        -38
_diffrn_reflns_limit_l_max        38
_diffrn_reflns_theta_min          2.730
_diffrn_reflns_theta_max          67.070
_diffrn_reflns_theta_full         67.679
_diffrn_measured_fraction_theta_max   0.982
_diffrn_measured_fraction_theta_full  0.971
_diffrn_reflns_Laue_measured_fraction_max    0.982
_diffrn_reflns_Laue_measured_fraction_full   0.971
_diffrn_reflns_point_group_measured_fraction_max   0.982
_diffrn_reflns_point_group_measured_fraction_full  0.971
_reflns_number_total              5917
_reflns_number_gt                 5604
_reflns_threshold_expression      'I > 2\s(I)'
_reflns_Friedel_coverage          0.000
_reflns_Friedel_fraction_max      .
_reflns_Friedel_fraction_full     .
 
_reflns_special_details
;
 Reflections were merged by SHELXL according to the crystal
 class for the calculation of statistics and refinement.
 
 _reflns_Friedel_fraction is defined as the number of unique
 Friedel pairs measured divided by the number that would be
 possible theoretically, ignoring centric projections and
 systematic absences.
;
 
_computing_data_collection        'Apex2 v2014.1-0 (Bruker, 2014)' 
_computing_cell_refinement        'SAINT V8.34A (Bruker, 2014)' 
_computing_data_reduction         'SAINT V8.34A (Bruker, 2014)'
_computing_structure_solution     'SHELXS-97 (Sheldrick, 2008)' 
_computing_structure_refinement   
;  
SHELXL-2013 (Sheldrick, 2013), 
SHELXLE Rev645 (H\"ubschle et al., 2011)
; 
_computing_molecular_graphics     ? 
_computing_publication_material   ?
 
_refine_special_details
;
 ?
;
_refine_ls_structure_factor_coef  Fsqd
_refine_ls_matrix_type            full
_refine_ls_weighting_scheme       calc
_refine_ls_weighting_details
'w=1/[\s^2^(Fo^2^)+(0.0266P)^2^+7.0357P] where P=(Fo^2^+2Fc^2^)/3'
_atom_sites_solution_primary      direct 
_atom_sites_solution_secondary    difmap
_atom_sites_solution_hydrogens    geom
_refine_ls_hydrogen_treatment     constr
_refine_ls_extinction_method      none
_refine_ls_extinction_coef        .
_refine_ls_number_reflns          5917
_refine_ls_number_parameters      539
_refine_ls_number_restraints      36
_refine_ls_R_factor_all           0.0355
_refine_ls_R_factor_gt            0.0333
_refine_ls_wR_factor_ref          0.0799
_refine_ls_wR_factor_gt           0.0786
_refine_ls_goodness_of_fit_ref    1.105
_refine_ls_restrained_S_all       1.113
_refine_ls_shift/su_max           0.001
_refine_ls_shift/su_mean          0.000
 
loop_
 _atom_site_label
 _atom_site_type_symbol
 _atom_site_fract_x
 _atom_site_fract_y
 _atom_site_fract_z
 _atom_site_U_iso_or_equiv
 _atom_site_adp_type
 _atom_site_occupancy
 _atom_site_site_symmetry_order  
 _atom_site_calc_flag
 _atom_site_refinement_flags_posn
 _atom_site_refinement_flags_adp
 _atom_site_refinement_flags_occupancy
 _atom_site_disorder_assembly
 _atom_site_disorder_group
C1 C -0.0983(2) 0.6152(4) 0.24905(8) 0.0220(6) Uani 1 1 d . . . . .
C2 C -0.1936(2) 0.5735(4) 0.24380(9) 0.0254(6) Uani 1 1 d . . . . .
H2 H -0.2257 0.5525 0.2182 0.031 Uiso 1 1 calc R U . . .
C3 C -0.2297(2) 0.5695(5) 0.28161(9) 0.0263(6) Uani 1 1 d . . . . .
H3 H -0.2919 0.5486 0.2875 0.032 Uiso 1 1 calc R U . . .
C4 C -0.15669(19) 0.6025(4) 0.31122(9) 0.0226(6) Uani 1 1 d . . . . .
C5 C -0.16576(19) 0.6095(4) 0.35352(9) 0.0241(6) Uani 1 1 d . . . . .
C6 C -0.0949(2) 0.6359(4) 0.38297(9) 0.0243(6) Uani 1 1 d . . . . .
C7 C -0.1046(2) 0.6316(5) 0.42688(9) 0.0278(7) Uani 1 1 d . . . . .
H7 H -0.1594 0.6099 0.4410 0.033 Uiso 1 1 calc R U . . .
C8 C -0.0211(2) 0.6643(5) 0.44455(9) 0.0266(6) Uani 1 1 d . . . . .
H8 H -0.0065 0.6696 0.4733 0.032 Uiso 1 1 calc R U . . .
C9 C 0.0411(2) 0.6895(4) 0.41184(9) 0.0235(6) Uani 1 1 d . . . . .
C10 C 0.1345(2) 0.7267(4) 0.41718(9) 0.0232(6) Uani 1 1 d . . . . .
C11 C 0.19624(19) 0.7274(4) 0.38550(8) 0.0228(6) Uani 1 1 d . . . . .
C12 C 0.2917(2) 0.7635(5) 0.39026(9) 0.0278(7) Uani 1 1 d . . . . .
H12 H 0.3227 0.8093 0.4145 0.033 Uiso 1 1 calc R U . . .
C13 C 0.3298(2) 0.7206(5) 0.35405(9) 0.0268(6) Uani 1 1 d . . . . .
H13 H 0.3926 0.7311 0.3481 0.032 Uiso 1 1 calc R U . . .
C14 C 0.25867(19) 0.6564(4) 0.32632(9) 0.0232(6) Uani 1 1 d . . . . .
C15 C 0.26836(19) 0.5906(4) 0.28496(9) 0.0224(6) Uani 1 1 d . . . . .
C16 C 0.19501(19) 0.5887(4) 0.25687(9) 0.0220(6) Uani 1 1 d . . . . .
C17 C 0.2103(2) 0.5732(4) 0.21332(9) 0.0244(6) Uani 1 1 d . . . . .
C18 C 0.1218(2) 0.6042(4) 0.19309(9) 0.0244(6) Uani 1 1 d . . . . .
C19 C 0.05859(19) 0.6252(4) 0.22585(8) 0.0211(6) Uani 1 1 d . . . . .
C20 C -0.0338(2) 0.6364(4) 0.21731(8) 0.0222(6) Uani 1 1 d . . . . .
C21 C -0.2606(2) 0.5972(5) 0.36952(9) 0.0293(7) Uani 1 1 d . . . . .
C22 C -0.3096(2) 0.4306(6) 0.36784(9) 0.0353(8) Uani 1 1 d . . . . .
H22 H -0.2837 0.3195 0.3567 0.042 Uiso 1 1 calc R U . . .
C23 C -0.3981(2) 0.4277(7) 0.38279(10) 0.0493(11) Uani 1 1 d . . . . .
H23 H -0.4327 0.3143 0.3816 0.059 Uiso 1 1 calc R U . . .
C24 C -0.4351(2) 0.5899(8) 0.39921(11) 0.0560(13) Uani 1 1 d . . . . .
H24 H -0.4951 0.5869 0.4094 0.067 Uiso 1 1 calc R U . . .
C25 C -0.3861(3) 0.7553(7) 0.40092(12) 0.0531(11) Uani 1 1 d . . . . .
H25 H -0.4119 0.8657 0.4124 0.064 Uiso 1 1 calc R U . . .
C26 C -0.2991(2) 0.7605(6) 0.38595(10) 0.0404(8) Uani 1 1 d . . . . .
H26 H -0.2653 0.8750 0.3868 0.048 Uiso 1 1 calc R U . . .
C27 C 0.1713(2) 0.7551(4) 0.46045(9) 0.0254(6) Uani 1 1 d . . . . .
C28 C 0.2379(2) 0.6338(5) 0.47702(9) 0.0293(7) Uani 1 1 d . . . . .
H28 H 0.2603 0.5338 0.4606 0.035 Uiso 1 1 calc R U . . .
C29 C 0.2720(2) 0.6576(5) 0.51727(10) 0.0349(8) Uani 1 1 d . . . . .
H29 H 0.3169 0.5734 0.5283 0.042 Uiso 1 1 calc R U . . .
C30 C 0.2405(2) 0.8035(5) 0.54122(10) 0.0363(8) Uani 1 1 d . . . . .
H30 H 0.2645 0.8212 0.5686 0.044 Uiso 1 1 calc R U . . .
C31 C 0.1741(2) 0.9234(5) 0.52531(10) 0.0366(8) Uani 1 1 d . . . . .
H31 H 0.1526 1.0239 0.5418 0.044 Uiso 1 1 calc R U . . .
C32 C 0.1386(2) 0.8982(5) 0.48534(9) 0.0312(7) Uani 1 1 d . . . . .
H32 H 0.0916 0.9793 0.4750 0.037 Uiso 1 1 calc R U . . .
C33 C 0.3545(2) 0.5319(4) 0.26809(9) 0.0254(6) Uani 1 1 d . . . . .
C34 C 0.4318(2) 0.4802(4) 0.29259(10) 0.0279(7) Uani 1 1 d . . . . .
H34 H 0.4272 0.4740 0.3217 0.034 Uiso 1 1 calc R U . . .
C35 C 0.5138(2) 0.4387(5) 0.27529(10) 0.0322(7) Uani 1 1 d . . . . .
H35 H 0.5650 0.4065 0.2926 0.039 Uiso 1 1 calc R U . . .
C36 C 0.5225(2) 0.4434(5) 0.23231(10) 0.0334(7) Uani 1 1 d . . . . .
H36 H 0.5800 0.4224 0.2206 0.040 Uiso 1 1 calc R U . . .
C37 C 0.4470(2) 0.4788(5) 0.20734(10) 0.0317(7) Uani 1 1 d . . . . .
H37 H 0.4521 0.4760 0.1782 0.038 Uiso 1 1 calc R U . . .
C38 C 0.3621(2) 0.5191(4) 0.22430(9) 0.0257(6) Uani 1 1 d . . . . .
C39 C -0.0584(2) 0.6653(4) 0.17354(9) 0.0241(6) Uani 1 1 d . . . . .
C40 C 0.0112(2) 0.6521(4) 0.14371(9) 0.0262(6) Uani 1 1 d . . . . .
C41 C -0.0102(2) 0.6885(5) 0.10168(9) 0.0307(7) Uani 1 1 d . . . . .
H41 H 0.0360 0.6773 0.0820 0.037 Uiso 1 1 calc R U . . .
C42 C -0.0965(2) 0.7396(5) 0.08870(9) 0.0328(7) Uani 1 1 d . . . . .
H42 H -0.1102 0.7629 0.0603 0.039 Uiso 1 1 calc R U . . .
C43 C -0.1642(2) 0.7572(5) 0.11782(9) 0.0314(7) Uani 1 1 d . . . . .
H43 H -0.2240 0.7942 0.1091 0.038 Uiso 1 1 calc R U . . .
C44 C -0.1455(2) 0.7215(4) 0.15897(9) 0.0275(6) Uani 1 1 d . . . . .
H44 H -0.1928 0.7353 0.1781 0.033 Uiso 1 1 calc R U . . .
C45 C 0.6405(7) 0.6738(13) 0.0510(3) 0.056(2) Uani 0.597(8) 1 d . U P A 1
H45A H 0.6750 0.6071 0.0300 0.083 Uiso 0.597(8) 1 calc DR U P A 1
H45B H 0.6375 0.5954 0.0758 0.083 Uiso 0.597(8) 1 calc DR U P A 1
H45C H 0.6709 0.7935 0.0579 0.083 Uiso 0.597(8) 1 calc DR U P A 1
C46 C 0.5417(5) 0.7144(12) 0.0336(3) 0.058(2) Uani 0.597(8) 1 d . U P A 1
H46A H 0.5387 0.8163 0.0126 0.070 Uiso 0.597(8) 1 calc R U P A 1
H46B H 0.4971 0.7370 0.0553 0.070 Uiso 0.597(8) 1 calc R U P A 1
C47 C 0.5359(5) 0.5079(12) 0.0143(2) 0.0491(19) Uani 0.597(8) 1 d . U P A 1
H47A H 0.5937 0.4786 0.0007 0.059 Uiso 0.597(8) 1 calc R U P A 1
H47B H 0.5280 0.4147 0.0367 0.059 Uiso 0.597(8) 1 calc R U P A 1
C48 C 0.6020(16) 0.647(4) 0.0109(6) 0.088(6) Uani 0.245(4) 1 d D U P B 2
H48A H 0.5962 0.5078 0.0085 0.105 Uiso 0.245(4) 1 calc R U P B 2
H48B H 0.6551 0.6905 -0.0046 0.105 Uiso 0.245(4) 1 calc R U P B 2
Cl1 Cl 0.4933(3) 0.7730(8) -0.00598(13) 0.0648(18) Uani 0.245(4) 1 d D U P B 2
Cl2 Cl 0.6076(6) 0.7267(16) 0.0659(3) 0.085(2) Uani 0.245(4) 1 d D U P B 2
C49 C 0.550(5) 0.538(8) 0.0285(8) 0.088(6) Uani 0.093(4) 1 d D U P C 3
H49A H 0.5762 0.4094 0.0261 0.105 Uiso 0.093(4) 1 calc R U P C 3
H49B H 0.4834 0.5336 0.0233 0.105 Uiso 0.093(4) 1 calc R U P C 3
Cl3 Cl 0.6076(15) 0.714(3) -0.0059(6) 0.106(7) Uani 0.093(4) 1 d D U P C 3
Cl4 Cl 0.5827(15) 0.654(3) 0.0797(7) 0.104(6) Uani 0.093(4) 1 d D U P C 3
N1 N -0.07584(16) 0.6254(3) 0.29042(7) 0.0214(5) Uani 1 1 d . . . . .
N2 N -0.00513(16) 0.6675(3) 0.37454(7) 0.0220(5) Uani 1 1 d . . . . .
N3 N 0.17726(16) 0.6719(3) 0.34502(7) 0.0214(5) Uani 1 1 d . . . . .
N4 N 0.10438(16) 0.6196(3) 0.26360(7) 0.0217(5) Uani 1 1 d . . . . .
N5 N 0.28950(17) 0.5472(4) 0.19675(7) 0.0271(5) Uani 1 1 d . . . . .
N6 N 0.10139(17) 0.6123(4) 0.15350(7) 0.0262(5) Uani 1 1 d . . . . .
Pd1 Pd 0.04974(2) 0.64794(3) 0.31843(2) 0.01914(8) Uani 1 1 d . . . . .
 
loop_
 _atom_site_aniso_label
 _atom_site_aniso_U_11
 _atom_site_aniso_U_22
 _atom_site_aniso_U_33
 _atom_site_aniso_U_23
 _atom_site_aniso_U_13
 _atom_site_aniso_U_12
C1 0.0304(15) 0.0137(14) 0.0219(13) 0.0000(11) 0.0000(11) 0.0036(12)
C2 0.0300(15) 0.0219(16) 0.0241(14) 0.0005(12) -0.0033(12) 0.0025(13)
C3 0.0233(14) 0.0249(16) 0.0305(15) 0.0015(13) -0.0002(12) 0.0006(12)
C4 0.0229(14) 0.0185(15) 0.0263(14) 0.0017(12) 0.0013(11) 0.0036(11)
C5 0.0229(14) 0.0227(16) 0.0269(14) 0.0030(12) 0.0050(11) 0.0045(12)
C6 0.0266(15) 0.0226(16) 0.0237(14) 0.0012(12) 0.0023(11) 0.0040(12)
C7 0.0262(15) 0.0318(18) 0.0257(15) 0.0020(13) 0.0051(12) 0.0038(13)
C8 0.0304(15) 0.0296(18) 0.0200(13) 0.0002(12) 0.0011(11) 0.0030(13)
C9 0.0269(15) 0.0199(16) 0.0236(14) 0.0019(12) 0.0012(11) 0.0048(12)
C10 0.0273(15) 0.0197(15) 0.0227(14) 0.0008(12) 0.0005(11) 0.0019(12)
C11 0.0260(14) 0.0197(15) 0.0226(14) 0.0003(12) -0.0011(11) 0.0001(12)
C12 0.0280(15) 0.0297(18) 0.0257(15) 0.0011(13) -0.0016(12) -0.0048(13)
C13 0.0262(15) 0.0266(17) 0.0277(15) 0.0030(13) 0.0010(12) -0.0034(13)
C14 0.0262(14) 0.0189(15) 0.0245(14) 0.0051(12) 0.0021(11) 0.0007(12)
C15 0.0256(14) 0.0152(14) 0.0264(14) 0.0029(11) 0.0031(11) -0.0022(12)
C16 0.0265(14) 0.0152(14) 0.0247(14) 0.0005(11) 0.0056(11) -0.0009(11)
C17 0.0312(15) 0.0170(15) 0.0251(14) -0.0022(12) 0.0041(12) -0.0011(12)
C18 0.0313(15) 0.0188(16) 0.0233(14) -0.0017(12) 0.0045(12) -0.0017(12)
C19 0.0274(14) 0.0131(14) 0.0230(13) -0.0006(11) 0.0023(11) 0.0000(11)
C20 0.0324(15) 0.0135(14) 0.0207(14) -0.0001(11) 0.0005(11) 0.0006(12)
C21 0.0240(15) 0.042(2) 0.0215(14) 0.0060(13) 0.0008(11) 0.0050(14)
C22 0.0278(16) 0.058(2) 0.0201(14) -0.0021(15) -0.0010(12) -0.0031(16)
C23 0.0308(18) 0.090(3) 0.0271(17) 0.0066(19) -0.0038(14) -0.019(2)
C24 0.0229(17) 0.111(4) 0.0346(19) 0.011(2) 0.0044(14) 0.018(2)
C25 0.042(2) 0.071(3) 0.047(2) 0.017(2) 0.0143(17) 0.025(2)
C26 0.0385(19) 0.047(2) 0.0366(18) 0.0089(16) 0.0086(14) 0.0153(17)
C27 0.0288(15) 0.0243(17) 0.0232(14) 0.0007(12) 0.0013(12) -0.0042(13)
C28 0.0299(16) 0.0324(18) 0.0257(15) -0.0011(13) 0.0015(12) -0.0003(14)
C29 0.0327(17) 0.041(2) 0.0304(16) 0.0032(15) -0.0024(13) -0.0006(15)
C30 0.0433(19) 0.041(2) 0.0240(15) -0.0024(14) -0.0023(13) -0.0092(16)
C31 0.051(2) 0.0322(19) 0.0271(16) -0.0070(14) 0.0066(14) -0.0050(16)
C32 0.0377(17) 0.0283(18) 0.0277(15) 0.0007(13) 0.0020(13) 0.0009(14)
C33 0.0285(15) 0.0181(16) 0.0300(15) -0.0003(12) 0.0057(12) -0.0029(12)
C34 0.0283(15) 0.0232(17) 0.0323(16) 0.0002(13) 0.0019(12) -0.0014(13)
C35 0.0276(16) 0.0285(18) 0.0405(18) -0.0022(15) 0.0014(13) 0.0031(14)
C36 0.0289(16) 0.0286(18) 0.0433(18) -0.0063(15) 0.0080(14) 0.0034(14)
C37 0.0355(17) 0.0275(18) 0.0327(16) -0.0048(14) 0.0099(13) 0.0015(14)
C38 0.0274(15) 0.0189(15) 0.0310(15) -0.0019(12) 0.0039(12) -0.0008(12)
C39 0.0330(16) 0.0167(15) 0.0224(14) -0.0023(11) -0.0013(12) 0.0025(12)
C40 0.0373(17) 0.0158(15) 0.0255(15) -0.0022(12) 0.0007(12) -0.0008(13)
C41 0.0439(18) 0.0249(17) 0.0236(15) -0.0027(12) 0.0030(13) -0.0003(14)
C42 0.052(2) 0.0246(18) 0.0212(14) -0.0019(13) -0.0048(13) 0.0014(15)
C43 0.0405(18) 0.0230(17) 0.0301(16) -0.0023(13) -0.0062(13) 0.0053(14)
C44 0.0399(17) 0.0172(15) 0.0254(14) -0.0016(12) -0.0002(12) -0.0018(13)
C45 0.060(5) 0.038(5) 0.066(6) 0.021(4) -0.033(4) -0.008(4)
C46 0.047(4) 0.058(5) 0.070(5) -0.009(4) 0.001(3) 0.010(3)
C47 0.048(4) 0.057(5) 0.042(3) 0.010(3) 0.008(3) -0.005(3)
C48 0.067(9) 0.060(12) 0.136(10) 0.015(8) 0.011(7) 0.022(8)
Cl1 0.061(3) 0.084(4) 0.049(2) 0.012(2) 0.0092(18) 0.031(2)
Cl2 0.067(5) 0.089(7) 0.099(6) 0.016(4) 0.004(4) 0.009(4)
C49 0.067(9) 0.060(12) 0.136(10) 0.015(8) 0.011(7) 0.022(8)
Cl3 0.110(13) 0.068(13) 0.139(14) 0.024(9) -0.032(10) -0.013(10)
Cl4 0.068(11) 0.079(14) 0.166(13) 0.002(9) 0.024(9) 0.024(9)
N1 0.0243(12) 0.0191(13) 0.0210(11) -0.0010(9) 0.0029(9) 0.0018(10)
N2 0.0231(12) 0.0200(13) 0.0228(12) 0.0024(10) 0.0016(9) 0.0026(10)
N3 0.0238(12) 0.0182(13) 0.0224(11) 0.0012(10) 0.0023(9) 0.0009(10)
N4 0.0255(12) 0.0180(13) 0.0216(11) 0.0008(9) 0.0012(9) -0.0008(10)
N5 0.0323(13) 0.0217(14) 0.0275(12) -0.0029(11) 0.0060(10) -0.0004(11)
N6 0.0338(14) 0.0211(14) 0.0237(12) -0.0018(10) 0.0024(10) -0.0023(11)
Pd1 0.02212(12) 0.01666(12) 0.01872(11) 0.00085(8) 0.00184(7) 0.00124(8)
 
_geom_special_details
;
 All esds (except the esd in the dihedral angle between two l.s. planes)
 are estimated using the full covariance matrix.  The cell esds are taken
 into account individually in the estimation of esds in distances, angles
 and torsion angles; correlations between esds in cell parameters are only
 used when they are defined by crystal symmetry.  An approximate (isotropic)
 treatment of cell esds is used for estimating esds involving l.s. planes.
;
 
loop_
 _geom_bond_atom_site_label_1
 _geom_bond_atom_site_label_2
 _geom_bond_distance
 _geom_bond_site_symmetry_2
 _geom_bond_publ_flag
C1 N1 1.371(4) . ?
C1 C20 1.429(4) . ?
C1 C2 1.434(4) . ?
C2 C3 1.350(4) . ?
C2 H2 0.9500 . ?
C3 C4 1.433(4) . ?
C3 H3 0.9500 . ?
C4 C5 1.381(4) . ?
C4 N1 1.393(4) . ?
C5 C6 1.400(4) . ?
C5 C21 1.505(4) . ?
C6 N2 1.373(4) . ?
C6 C7 1.434(4) . ?
C7 C8 1.355(4) . ?
C7 H7 0.9500 . ?
C8 C9 1.433(4) . ?
C8 H8 0.9500 . ?
C9 N2 1.375(4) . ?
C9 C10 1.400(4) . ?
C10 C11 1.391(4) . ?
C10 C27 1.498(4) . ?
C11 N3 1.388(4) . ?
C11 C12 1.427(4) . ?
C12 C13 1.351(4) . ?
C12 H12 0.9500 . ?
C13 C14 1.429(4) . ?
C13 H13 0.9500 . ?
C14 N3 1.362(4) . ?
C14 C15 1.430(4) . ?
C15 C16 1.386(4) . ?
C15 C33 1.455(4) . ?
C16 N4 1.372(4) . ?
C16 C17 1.440(4) . ?
C17 N5 1.309(4) . ?
C17 C18 1.453(4) . ?
C18 N6 1.308(4) . ?
C18 C19 1.440(4) . ?
C19 N4 1.376(4) . ?
C19 C20 1.378(4) . ?
C20 C39 1.465(4) . ?
C21 C22 1.381(5) . ?
C21 C26 1.400(5) . ?
C22 C23 1.401(5) . ?
C22 H22 0.9500 . ?
C23 C24 1.384(7) . ?
C23 H23 0.9500 . ?
C24 C25 1.375(7) . ?
C24 H24 0.9500 . ?
C25 C26 1.381(5) . ?
C25 H25 0.9500 . ?
C26 H26 0.9500 . ?
C27 C32 1.390(4) . ?
C27 C28 1.395(4) . ?
C28 C29 1.390(4) . ?
C28 H28 0.9500 . ?
C29 C30 1.380(5) . ?
C29 H29 0.9500 . ?
C30 C31 1.379(5) . ?
C30 H30 0.9500 . ?
C31 C32 1.391(4) . ?
C31 H31 0.9500 . ?
C32 H32 0.9500 . ?
C33 C34 1.411(4) . ?
C33 C38 1.429(4) . ?
C34 C35 1.376(4) . ?
C34 H34 0.9500 . ?
C35 C36 1.402(5) . ?
C35 H35 0.9500 . ?
C36 C37 1.373(5) . ?
C36 H36 0.9500 . ?
C37 C38 1.407(4) . ?
C37 H37 0.9500 . ?
C38 N5 1.381(4) . ?
C39 C44 1.406(4) . ?
C39 C40 1.431(4) . ?
C40 N6 1.381(4) . ?
C40 C41 1.410(4) . ?
C41 C42 1.370(5) . ?
C41 H41 0.9500 . ?
C42 C43 1.398(5) . ?
C42 H42 0.9500 . ?
C43 C44 1.375(4) . ?
C43 H43 0.9500 . ?
C44 H44 0.9500 . ?
C45 C46 1.566(11) . ?
C45 H45A 0.9800 . ?
C45 H45B 0.9800 . ?
C45 H45C 0.9800 . ?
C46 C47 1.591(12) . ?
C46 H46A 0.9900 . ?
C46 H46B 0.9900 . ?
C47 C47 1.383(14) 3_665 ?
C47 H47A 0.9900 . ?
C47 H47B 0.9900 . ?
C48 Cl2 1.87(2) . ?
C48 Cl1 1.893(19) . ?
C48 H48A 0.9900 . ?
C48 H48B 0.9900 . ?
C49 Cl3 1.89(2) . ?
C49 Cl4 1.90(2) . ?
C49 H49A 0.9900 . ?
C49 H49B 0.9900 . ?
N1 Pd1 2.033(2) . ?
N2 Pd1 2.017(2) . ?
N3 Pd1 2.041(2) . ?
N4 Pd1 1.983(2) . ?
 
loop_
 _geom_angle_atom_site_label_1
 _geom_angle_atom_site_label_2
 _geom_angle_atom_site_label_3
 _geom_angle
 _geom_angle_site_symmetry_1
 _geom_angle_site_symmetry_3
 _geom_angle_publ_flag
N1 C1 C20 123.6(3) . . ?
N1 C1 C2 109.2(2) . . ?
C20 C1 C2 127.1(3) . . ?
C3 C2 C1 107.9(3) . . ?
C3 C2 H2 126.1 . . ?
C1 C2 H2 126.1 . . ?
C2 C3 C4 107.2(3) . . ?
C2 C3 H3 126.4 . . ?
C4 C3 H3 126.4 . . ?
C5 C4 N1 125.9(3) . . ?
C5 C4 C3 125.1(3) . . ?
N1 C4 C3 109.0(2) . . ?
C4 C5 C6 125.9(3) . . ?
C4 C5 C21 117.4(3) . . ?
C6 C5 C21 116.6(3) . . ?
N2 C6 C5 125.6(3) . . ?
N2 C6 C7 109.1(3) . . ?
C5 C6 C7 125.2(3) . . ?
C8 C7 C6 107.3(3) . . ?
C8 C7 H7 126.4 . . ?
C6 C7 H7 126.4 . . ?
C7 C8 C9 107.4(3) . . ?
C7 C8 H8 126.3 . . ?
C9 C8 H8 126.3 . . ?
N2 C9 C10 125.6(3) . . ?
N2 C9 C8 109.1(2) . . ?
C10 C9 C8 125.3(3) . . ?
C11 C10 C9 124.6(3) . . ?
C11 C10 C27 117.7(3) . . ?
C9 C10 C27 117.5(2) . . ?
N3 C11 C10 125.5(3) . . ?
N3 C11 C12 108.6(2) . . ?
C10 C11 C12 125.6(3) . . ?
C13 C12 C11 107.4(3) . . ?
C13 C12 H12 126.3 . . ?
C11 C12 H12 126.3 . . ?
C12 C13 C14 107.6(3) . . ?
C12 C13 H13 126.2 . . ?
C14 C13 H13 126.2 . . ?
N3 C14 C13 109.2(3) . . ?
N3 C14 C15 124.0(3) . . ?
C13 C14 C15 126.8(3) . . ?
C16 C15 C14 121.2(3) . . ?
C16 C15 C33 114.6(3) . . ?
C14 C15 C33 124.0(3) . . ?
N4 C16 C15 129.0(3) . . ?
N4 C16 C17 110.6(2) . . ?
C15 C16 C17 120.0(3) . . ?
N5 C17 C16 125.6(3) . . ?
N5 C17 C18 129.0(3) . . ?
C16 C17 C18 105.3(2) . . ?
N6 C18 C19 125.9(3) . . ?
N6 C18 C17 128.4(3) . . ?
C19 C18 C17 105.8(2) . . ?
N4 C19 C20 129.0(3) . . ?
N4 C19 C18 110.1(2) . . ?
C20 C19 C18 120.8(3) . . ?
C19 C20 C1 121.4(3) . . ?
C19 C20 C39 114.3(3) . . ?
C1 C20 C39 124.3(3) . . ?
C22 C21 C26 120.3(3) . . ?
C22 C21 C5 121.5(3) . . ?
C26 C21 C5 118.2(3) . . ?
C21 C22 C23 119.1(4) . . ?
C21 C22 H22 120.5 . . ?
C23 C22 H22 120.5 . . ?
C24 C23 C22 120.1(4) . . ?
C24 C23 H23 120.0 . . ?
C22 C23 H23 120.0 . . ?
C25 C24 C23 120.7(3) . . ?
C25 C24 H24 119.7 . . ?
C23 C24 H24 119.7 . . ?
C24 C25 C26 119.8(4) . . ?
C24 C25 H25 120.1 . . ?
C26 C25 H25 120.1 . . ?
C25 C26 C21 120.0(4) . . ?
C25 C26 H26 120.0 . . ?
C21 C26 H26 120.0 . . ?
C32 C27 C28 118.5(3) . . ?
C32 C27 C10 121.2(3) . . ?
C28 C27 C10 120.2(3) . . ?
C29 C28 C27 120.8(3) . . ?
C29 C28 H28 119.6 . . ?
C27 C28 H28 119.6 . . ?
C30 C29 C28 120.1(3) . . ?
C30 C29 H29 120.0 . . ?
C28 C29 H29 120.0 . . ?
C31 C30 C29 119.7(3) . . ?
C31 C30 H30 120.1 . . ?
C29 C30 H30 120.1 . . ?
C30 C31 C32 120.5(3) . . ?
C30 C31 H31 119.8 . . ?
C32 C31 H31 119.8 . . ?
C27 C32 C31 120.4(3) . . ?
C27 C32 H32 119.8 . . ?
C31 C32 H32 119.8 . . ?
C34 C33 C38 117.0(3) . . ?
C34 C33 C15 123.8(3) . . ?
C38 C33 C15 119.2(3) . . ?
C35 C34 C33 121.6(3) . . ?
C35 C34 H34 119.2 . . ?
C33 C34 H34 119.2 . . ?
C34 C35 C36 120.5(3) . . ?
C34 C35 H35 119.7 . . ?
C36 C35 H35 119.7 . . ?
C37 C36 C35 119.4(3) . . ?
C37 C36 H36 120.3 . . ?
C35 C36 H36 120.3 . . ?
C36 C37 C38 121.0(3) . . ?
C36 C37 H37 119.5 . . ?
C38 C37 H37 119.5 . . ?
N5 C38 C37 116.8(3) . . ?
N5 C38 C33 123.2(3) . . ?
C37 C38 C33 120.0(3) . . ?
C44 C39 C40 116.9(3) . . ?
C44 C39 C20 123.8(3) . . ?
C40 C39 C20 119.1(3) . . ?
N6 C40 C41 116.1(3) . . ?
N6 C40 C39 123.9(3) . . ?
C41 C40 C39 119.9(3) . . ?
C42 C41 C40 121.2(3) . . ?
C42 C41 H41 119.4 . . ?
C40 C41 H41 119.4 . . ?
C41 C42 C43 119.2(3) . . ?
C41 C42 H42 120.4 . . ?
C43 C42 H42 120.4 . . ?
C44 C43 C42 120.9(3) . . ?
C44 C43 H43 119.5 . . ?
C42 C43 H43 119.5 . . ?
C43 C44 C39 121.8(3) . . ?
C43 C44 H44 119.1 . . ?
C39 C44 H44 119.1 . . ?
C46 C45 H45A 109.5 . . ?
C46 C45 H45B 109.5 . . ?
H45A C45 H45B 109.5 . . ?
C46 C45 H45C 109.5 . . ?
H45A C45 H45C 109.5 . . ?
H45B C45 H45C 109.5 . . ?
C45 C46 C47 90.5(6) . . ?
C45 C46 H46A 113.6 . . ?
C47 C46 H46A 113.6 . . ?
C45 C46 H46B 113.6 . . ?
C47 C46 H46B 113.6 . . ?
H46A C46 H46B 110.8 . . ?
C47 C47 C46 111.4(10) 3_665 . ?
C47 C47 H47A 109.3 3_665 . ?
C46 C47 H47A 109.3 . . ?
C47 C47 H47B 109.3 3_665 . ?
C46 C47 H47B 109.3 . . ?
H47A C47 H47B 108.0 . . ?
Cl2 C48 Cl1 98.1(12) . . ?
Cl2 C48 H48A 112.1 . . ?
Cl1 C48 H48A 112.1 . . ?
Cl2 C48 H48B 112.1 . . ?
Cl1 C48 H48B 112.1 . . ?
H48A C48 H48B 109.8 . . ?
Cl3 C49 Cl4 97.2(17) . . ?
Cl3 C49 H49A 112.3 . . ?
Cl4 C49 H49A 112.3 . . ?
Cl3 C49 H49B 112.3 . . ?
Cl4 C49 H49B 112.3 . . ?
H49A C49 H49B 109.9 . . ?
C1 N1 C4 106.6(2) . . ?
C1 N1 Pd1 128.70(19) . . ?
C4 N1 Pd1 124.57(19) . . ?
C6 N2 C9 107.1(2) . . ?
C6 N2 Pd1 125.63(19) . . ?
C9 N2 Pd1 126.81(19) . . ?
C14 N3 C11 106.9(2) . . ?
C14 N3 Pd1 127.70(19) . . ?
C11 N3 Pd1 125.06(18) . . ?
C16 N4 C19 108.1(2) . . ?
C16 N4 Pd1 125.54(19) . . ?
C19 N4 Pd1 126.34(19) . . ?
C17 N5 C38 115.6(2) . . ?
C18 N6 C40 114.9(3) . . ?
N4 Pd1 N2 178.08(10) . . ?
N4 Pd1 N1 88.87(9) . . ?
N2 Pd1 N1 91.38(9) . . ?
N4 Pd1 N3 89.64(9) . . ?
N2 Pd1 N3 90.13(9) . . ?
N1 Pd1 N3 178.45(9) . . ?
 
loop_
 _geom_torsion_atom_site_label_1
 _geom_torsion_atom_site_label_2
 _geom_torsion_atom_site_label_3
 _geom_torsion_atom_site_label_4
 _geom_torsion
 _geom_torsion_site_symmetry_1
 _geom_torsion_site_symmetry_2
 _geom_torsion_site_symmetry_3
 _geom_torsion_site_symmetry_4
 _geom_torsion_publ_flag
N1 C1 C2 C3 3.5(3) . . . . ?
C20 C1 C2 C3 -178.8(3) . . . . ?
C1 C2 C3 C4 -1.9(4) . . . . ?
C2 C3 C4 C5 179.9(3) . . . . ?
C2 C3 C4 N1 -0.3(4) . . . . ?
N1 C4 C5 C6 -1.8(5) . . . . ?
C3 C4 C5 C6 177.9(3) . . . . ?
N1 C4 C5 C21 175.0(3) . . . . ?
C3 C4 C5 C21 -5.2(5) . . . . ?
C4 C5 C6 N2 3.1(5) . . . . ?
C21 C5 C6 N2 -173.8(3) . . . . ?
C4 C5 C6 C7 -176.1(3) . . . . ?
C21 C5 C6 C7 7.1(5) . . . . ?
N2 C6 C7 C8 1.2(4) . . . . ?
C5 C6 C7 C8 -179.6(3) . . . . ?
C6 C7 C8 C9 0.1(4) . . . . ?
C7 C8 C9 N2 -1.3(4) . . . . ?
C7 C8 C9 C10 179.9(3) . . . . ?
N2 C9 C10 C11 -7.1(5) . . . . ?
C8 C9 C10 C11 171.5(3) . . . . ?
N2 C9 C10 C27 177.2(3) . . . . ?
C8 C9 C10 C27 -4.2(5) . . . . ?
C9 C10 C11 N3 -7.4(5) . . . . ?
C27 C10 C11 N3 168.3(3) . . . . ?
C9 C10 C11 C12 -179.5(3) . . . . ?
C27 C10 C11 C12 -3.8(5) . . . . ?
N3 C11 C12 C13 -3.3(4) . . . . ?
C10 C11 C12 C13 170.0(3) . . . . ?
C11 C12 C13 C14 -0.2(4) . . . . ?
C12 C13 C14 N3 3.7(4) . . . . ?
C12 C13 C14 C15 -178.0(3) . . . . ?
N3 C14 C15 C16 18.8(4) . . . . ?
C13 C14 C15 C16 -159.3(3) . . . . ?
N3 C14 C15 C33 -165.0(3) . . . . ?
C13 C14 C15 C33 16.9(5) . . . . ?
C14 C15 C16 N4 -9.8(5) . . . . ?
C33 C15 C16 N4 173.7(3) . . . . ?
C14 C15 C16 C17 162.7(3) . . . . ?
C33 C15 C16 C17 -13.8(4) . . . . ?
N4 C16 C17 N5 178.7(3) . . . . ?
C15 C16 C17 N5 4.9(5) . . . . ?
N4 C16 C17 C18 2.1(3) . . . . ?
C15 C16 C17 C18 -171.6(3) . . . . ?
N5 C17 C18 N6 0.3(5) . . . . ?
C16 C17 C18 N6 176.7(3) . . . . ?
N5 C17 C18 C19 -179.6(3) . . . . ?
C16 C17 C18 C19 -3.3(3) . . . . ?
N6 C18 C19 N4 -176.5(3) . . . . ?
C17 C18 C19 N4 3.4(3) . . . . ?
N6 C18 C19 C20 7.1(5) . . . . ?
C17 C18 C19 C20 -172.9(3) . . . . ?
N4 C19 C20 C1 -9.7(5) . . . . ?
C18 C19 C20 C1 165.9(3) . . . . ?
N4 C19 C20 C39 172.2(3) . . . . ?
C18 C19 C20 C39 -12.2(4) . . . . ?
N1 C1 C20 C19 15.3(4) . . . . ?
C2 C1 C20 C19 -162.0(3) . . . . ?
N1 C1 C20 C39 -166.7(3) . . . . ?
C2 C1 C20 C39 15.9(5) . . . . ?
C4 C5 C21 C22 71.3(4) . . . . ?
C6 C5 C21 C22 -111.6(3) . . . . ?
C4 C5 C21 C26 -108.1(3) . . . . ?
C6 C5 C21 C26 69.1(4) . . . . ?
C26 C21 C22 C23 0.0(5) . . . . ?
C5 C21 C22 C23 -179.3(3) . . . . ?
C21 C22 C23 C24 -0.5(5) . . . . ?
C22 C23 C24 C25 0.3(5) . . . . ?
C23 C24 C25 C26 0.3(6) . . . . ?
C24 C25 C26 C21 -0.7(5) . . . . ?
C22 C21 C26 C25 0.6(5) . . . . ?
C5 C21 C26 C25 179.9(3) . . . . ?
C11 C10 C27 C32 124.6(3) . . . . ?
C9 C10 C27 C32 -59.3(4) . . . . ?
C11 C10 C27 C28 -57.2(4) . . . . ?
C9 C10 C27 C28 118.8(3) . . . . ?
C32 C27 C28 C29 -1.1(5) . . . . ?
C10 C27 C28 C29 -179.4(3) . . . . ?
C27 C28 C29 C30 -0.6(5) . . . . ?
C28 C29 C30 C31 1.1(5) . . . . ?
C29 C30 C31 C32 0.1(5) . . . . ?
C28 C27 C32 C31 2.4(5) . . . . ?
C10 C27 C32 C31 -179.4(3) . . . . ?
C30 C31 C32 C27 -1.9(5) . . . . ?
C16 C15 C33 C34 -164.3(3) . . . . ?
C14 C15 C33 C34 19.3(5) . . . . ?
C16 C15 C33 C38 13.7(4) . . . . ?
C14 C15 C33 C38 -162.7(3) . . . . ?
C38 C33 C34 C35 6.7(5) . . . . ?
C15 C33 C34 C35 -175.3(3) . . . . ?
C33 C34 C35 C36 -1.1(5) . . . . ?
C34 C35 C36 C37 -3.9(5) . . . . ?
C35 C36 C37 C38 3.0(5) . . . . ?
C36 C37 C38 N5 -178.1(3) . . . . ?
C36 C37 C38 C33 2.7(5) . . . . ?
C34 C33 C38 N5 173.5(3) . . . . ?
C15 C33 C38 N5 -4.7(5) . . . . ?
C34 C33 C38 C37 -7.4(4) . . . . ?
C15 C33 C38 C37 174.4(3) . . . . ?
C19 C20 C39 C44 -165.6(3) . . . . ?
C1 C20 C39 C44 16.3(5) . . . . ?
C19 C20 C39 C40 8.8(4) . . . . ?
C1 C20 C39 C40 -169.3(3) . . . . ?
C44 C39 C40 N6 175.1(3) . . . . ?
C20 C39 C40 N6 0.4(4) . . . . ?
C44 C39 C40 C41 -2.2(4) . . . . ?
C20 C39 C40 C41 -176.9(3) . . . . ?
N6 C40 C41 C42 -176.4(3) . . . . ?
C39 C40 C41 C42 1.1(5) . . . . ?
C40 C41 C42 C43 0.4(5) . . . . ?
C41 C42 C43 C44 -0.8(5) . . . . ?
C42 C43 C44 C39 -0.3(5) . . . . ?
C40 C39 C44 C43 1.8(4) . . . . ?
C20 C39 C44 C43 176.3(3) . . . . ?
C45 C46 C47 C47 -165.0(8) . . . 3_665 ?
C20 C1 N1 C4 178.6(3) . . . . ?
C2 C1 N1 C4 -3.6(3) . . . . ?
C20 C1 N1 Pd1 -6.0(4) . . . . ?
C2 C1 N1 Pd1 171.8(2) . . . . ?
C5 C4 N1 C1 -177.7(3) . . . . ?
C3 C4 N1 C1 2.5(3) . . . . ?
C5 C4 N1 Pd1 6.6(4) . . . . ?
C3 C4 N1 Pd1 -173.2(2) . . . . ?
C5 C6 N2 C9 178.7(3) . . . . ?
C7 C6 N2 C9 -2.0(3) . . . . ?
C5 C6 N2 Pd1 -9.1(4) . . . . ?
C7 C6 N2 Pd1 170.2(2) . . . . ?
C10 C9 N2 C6 -179.2(3) . . . . ?
C8 C9 N2 C6 2.1(3) . . . . ?
C10 C9 N2 Pd1 8.7(4) . . . . ?
C8 C9 N2 Pd1 -170.0(2) . . . . ?
C13 C14 N3 C11 -5.7(3) . . . . ?
C15 C14 N3 C11 175.9(3) . . . . ?
C13 C14 N3 Pd1 168.2(2) . . . . ?
C15 C14 N3 Pd1 -10.2(4) . . . . ?
C10 C11 N3 C14 -167.7(3) . . . . ?
C12 C11 N3 C14 5.5(3) . . . . ?
C10 C11 N3 Pd1 18.2(4) . . . . ?
C12 C11 N3 Pd1 -168.6(2) . . . . ?
C15 C16 N4 C19 173.0(3) . . . . ?
C17 C16 N4 C19 0.0(3) . . . . ?
C15 C16 N4 Pd1 -7.6(4) . . . . ?
C17 C16 N4 Pd1 179.36(19) . . . . ?
C20 C19 N4 C16 173.8(3) . . . . ?
C18 C19 N4 C16 -2.2(3) . . . . ?
C20 C19 N4 Pd1 -5.6(4) . . . . ?
C18 C19 N4 Pd1 178.46(19) . . . . ?
C16 C17 N5 C38 5.0(4) . . . . ?
C18 C17 N5 C38 -179.3(3) . . . . ?
C37 C38 N5 C17 176.1(3) . . . . ?
C33 C38 N5 C17 -4.8(4) . . . . ?
C19 C18 N6 C40 2.7(4) . . . . ?
C17 C18 N6 C40 -177.3(3) . . . . ?
C41 C40 N6 C18 171.2(3) . . . . ?
C39 C40 N6 C18 -6.2(4) . . . . ?
 
_refine_diff_density_max    0.523
_refine_diff_density_min   -0.731
_refine_diff_density_rms    0.071

_shelxl_version_number 2013-4
